# Supplementary material for: Computational study on the NHC-catalyzed synthesis of 2,3-disubstituted indoles: mechanism, key intermediate and the role of the catalyst
Source: Royal Society of Chemistry journal article supplement (doi:10.1039/c8qo00139a), 2018-01-01
Supplement: c8qo00139a1.pdf [file c8qo00139a1.pdf]

# Supporting information

## Computational Study on the NHC-Catalyzed Synthesis of 2,3-Disubstituted Indoles: Mechanism, Key Intermediate and Role of Catalyst

Peng-Cheng Tu <sup>a</sup>, Lin Zhou <sup>a</sup>, Alexander M. Kirillov <sup>b</sup>, Ran Fang<sup>\*a</sup>, and Lizi Yang<sup>\*a</sup>

<sup>a</sup>State Key Laboratory of Applied Organic Chemistry and Key Laboratory of Nonferrous Metals Chemistry and Resources Utilization of Gansu Province, College of Chemistry and Chemical Engineering, Lanzhou University, Lanzhou 730000, P. R. China;

<sup>b</sup>Centro de Química Estrutural, Complexo I, Instituto Superior Técnico, Universidade de Lisboa, Av. Rovisco Pais, 1049-001, Lisbon, Portugal

### Table of Contents

|                                                                                                             |     |
|-------------------------------------------------------------------------------------------------------------|-----|
| 1. Energy profiles for the <i>Re</i> face.....                                                              | S2  |
| 2. Energy profiles for the first direct [1,2] proton migration and assisted by DBU .....                    | S3  |
| 3. Energy profiles for the first direct [1,2] proton migration of path a for series B .....                 | S4  |
| 4. Energy profiles for the second direct [1,2] proton migration and assisted by DBU, DBU-H <sup>+</sup> ... | S5  |
| 5. Energy profiles for the second direct [1,2] proton migration of path a for series B.....                 | S6  |
| 6. Energy profiles for the first, second direct [1,2] proton migration of path b for series A.....          | S7  |
| 7. Energy profiles for the first, second direct [1,2] proton migration of path b for series B.....          | S8  |
| 8. The calculation results of flexible scan to the N–H bond of A-11a.....                                   | S9  |
| 9. The electrostatic potential analysis and the NPA charge distributions.....                               | S10 |
| 10. Energy profiles for the first [1,2] proton migration assisted by H <sub>2</sub> O.....                  | S11 |
| 11. The energies for species of path a in series A.....                                                     | S12 |
| 12. The energies for species of path b in series A.....                                                     | S13 |
| 13. The Cartesian coordinates of the stationary points for series A.....                                    | S14 |
| 14. The energies for species of path a in series B.....                                                     | S66 |
| 15. The energies for species of path b in series B.....                                                     | S67 |
| 16. The Cartesian coordinates of the stationary points for series B.....                                    | S68 |

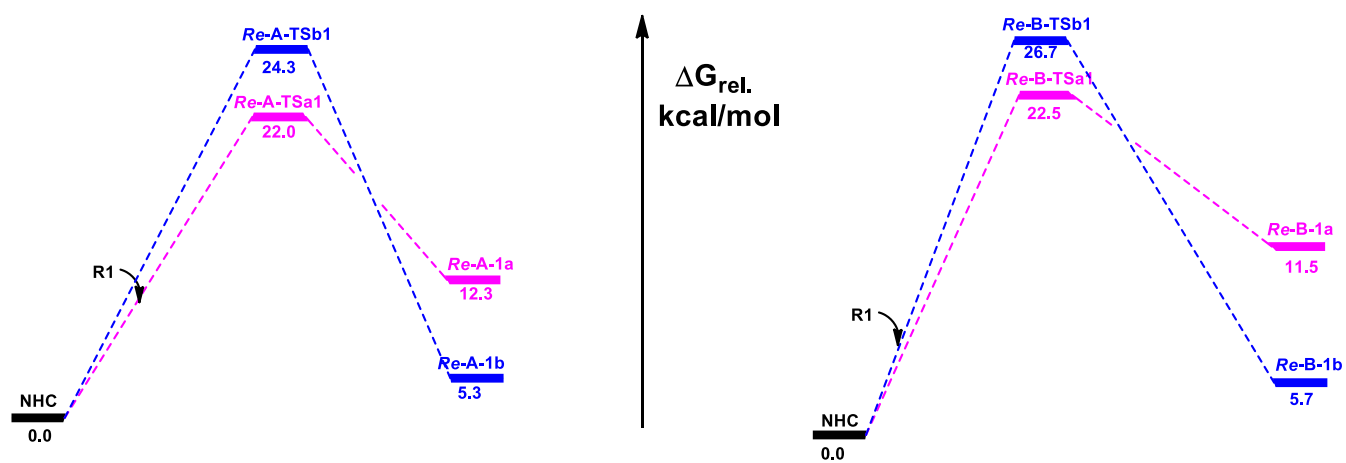

**Figure S1.** Energy profiles for the *Re* face of path **a** and **b**, the relative energies are given in kcal/mol.

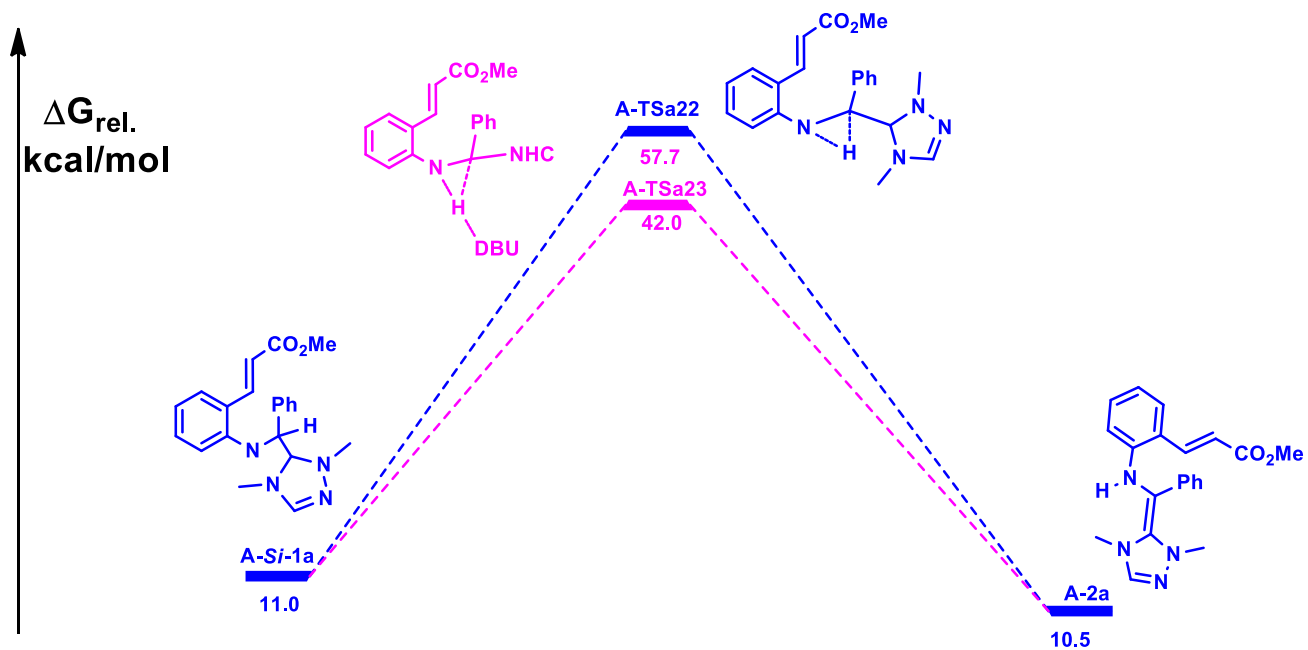

**Figure S2** Energy profiles for the first direct [1,2] proton migration and assisted by DBU of path **a** for series **A**; the relative energies are given in kcal/mol.

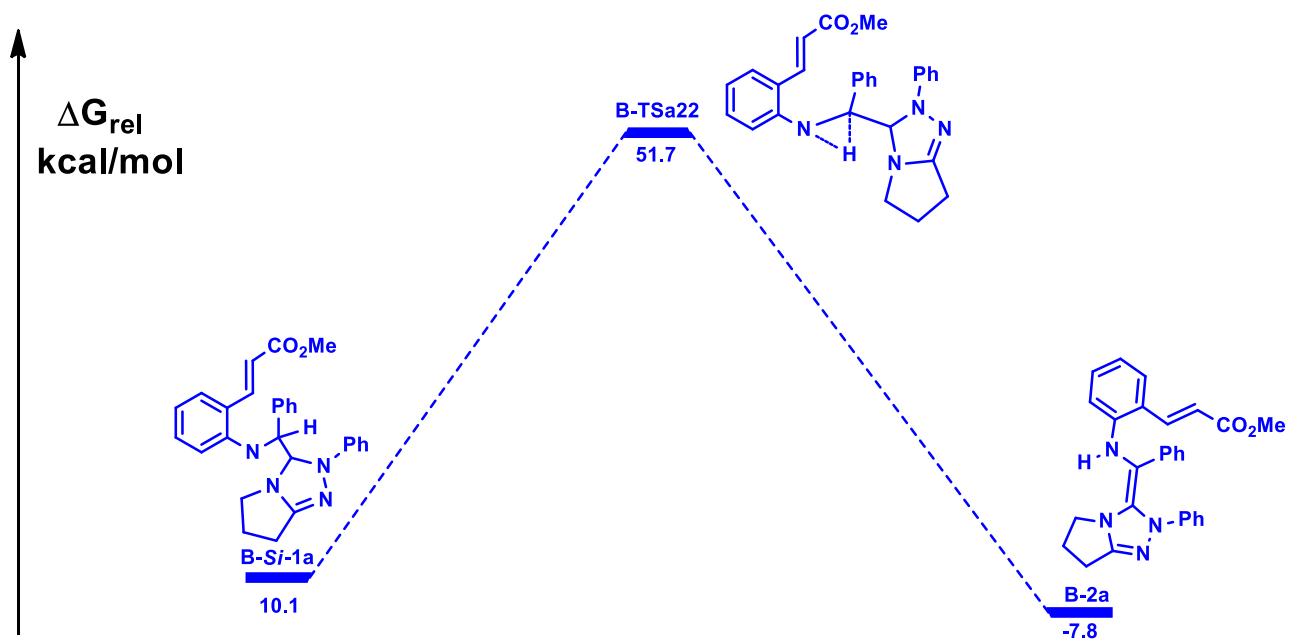

**Figure S3.** Energy profiles for the first direct [1,2] proton migration of path **a** for series **B**; the relative energies are given in kcal/mol.

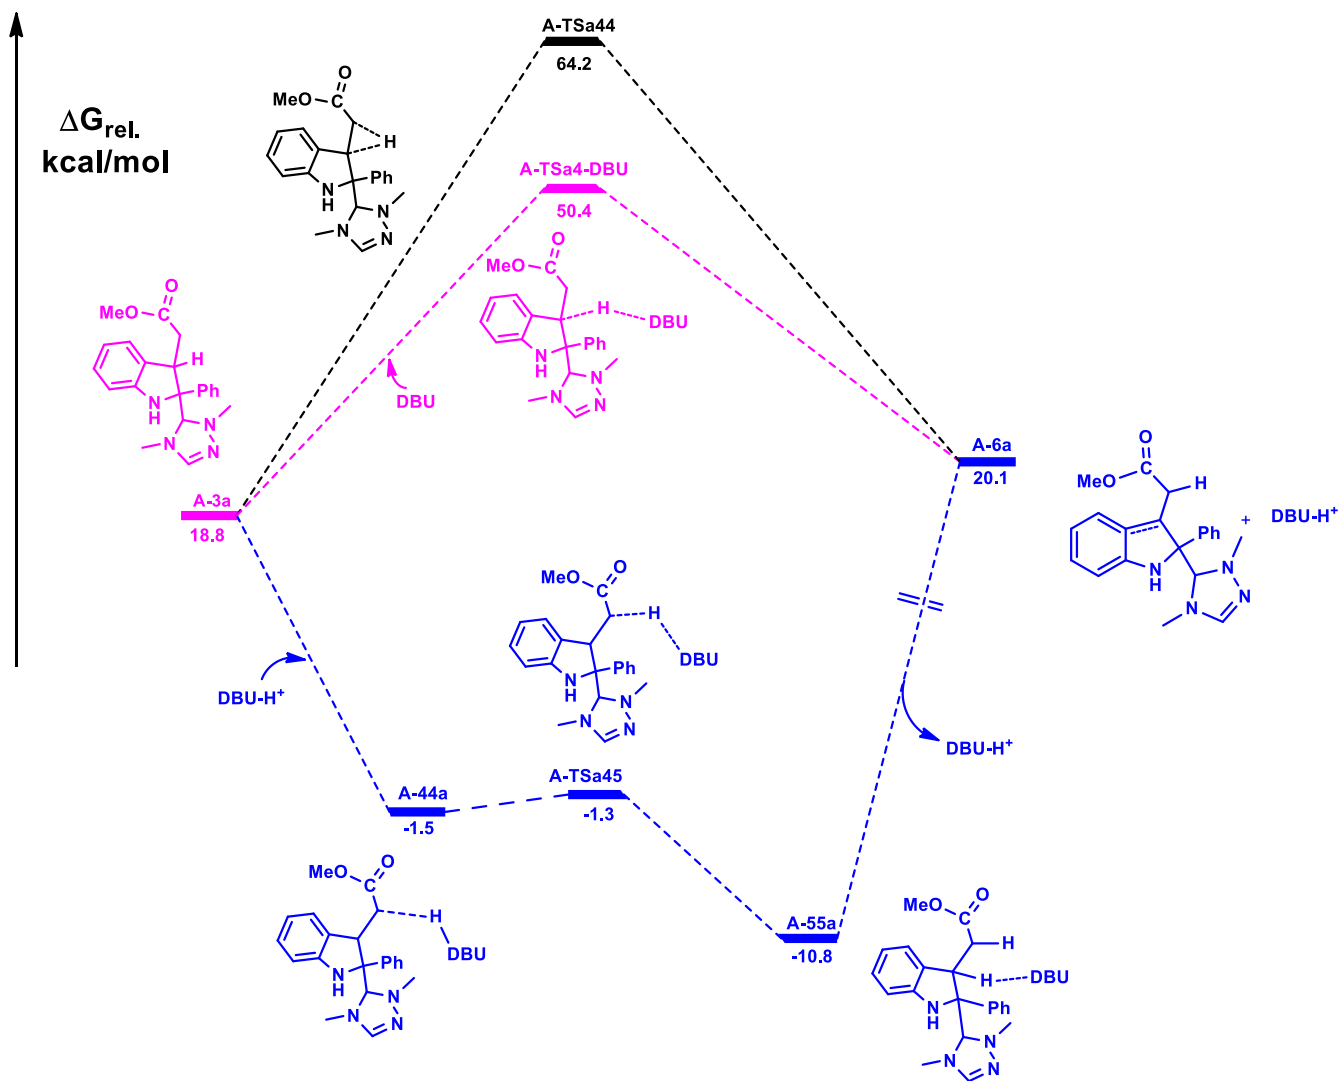

**Figure S4** Energy profiles for the second direct [1,2] proton migration and assisted by DBU, DBU-H<sup>+</sup> of path **a** for series **A**; the relative energies are given in kcal/mol.

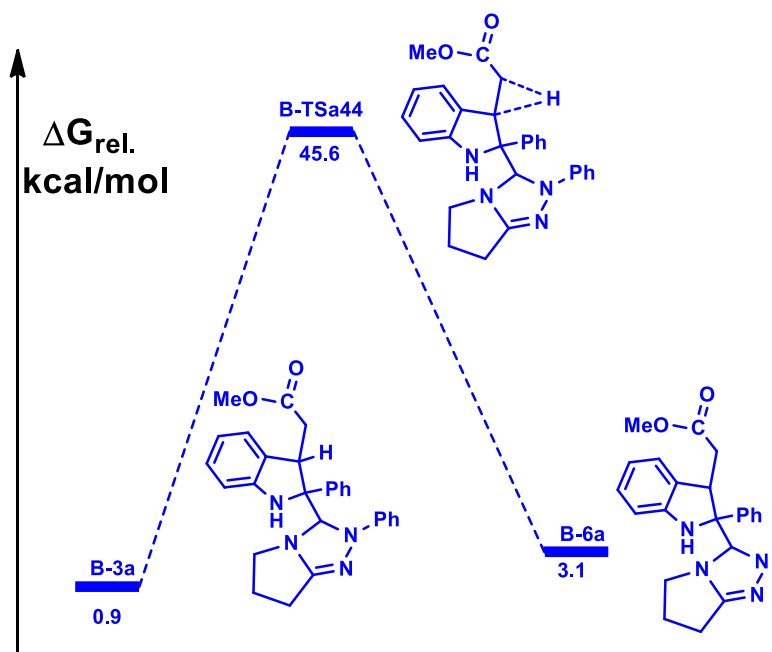

**Figure S5.** Energy profiles for the second direct [1,2] proton migration of path **a** for series **B**; the relative energies are given in kcal/mol.

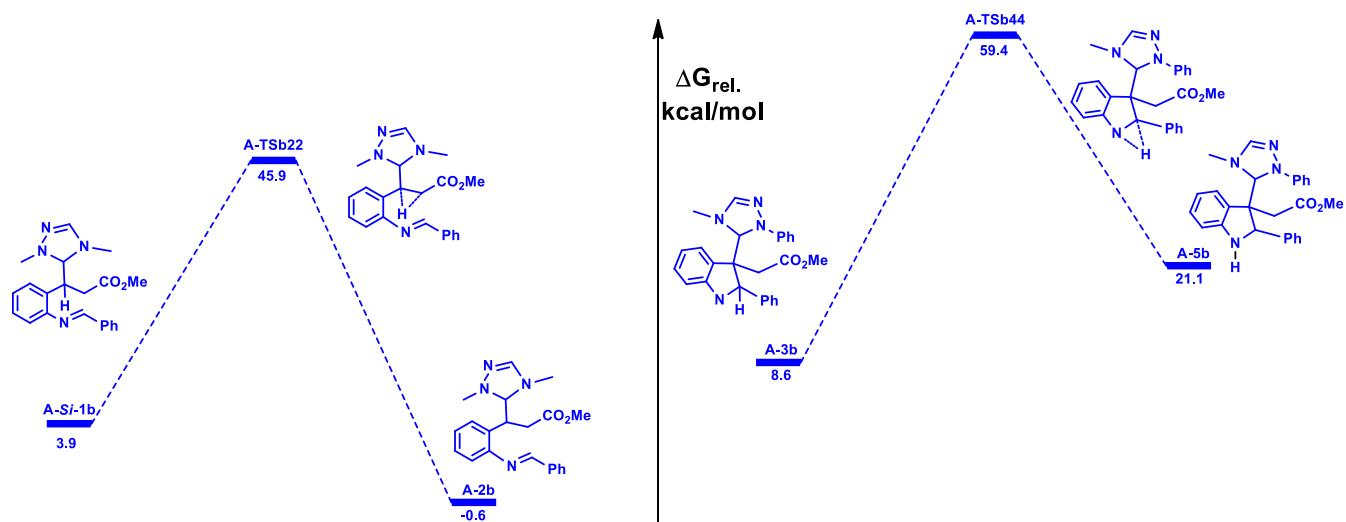

**Figure S6.** Energy profiles for the first and second direct [1,2] proton migration of path **b** for series **A**; the relative energies are given in kcal/mol.

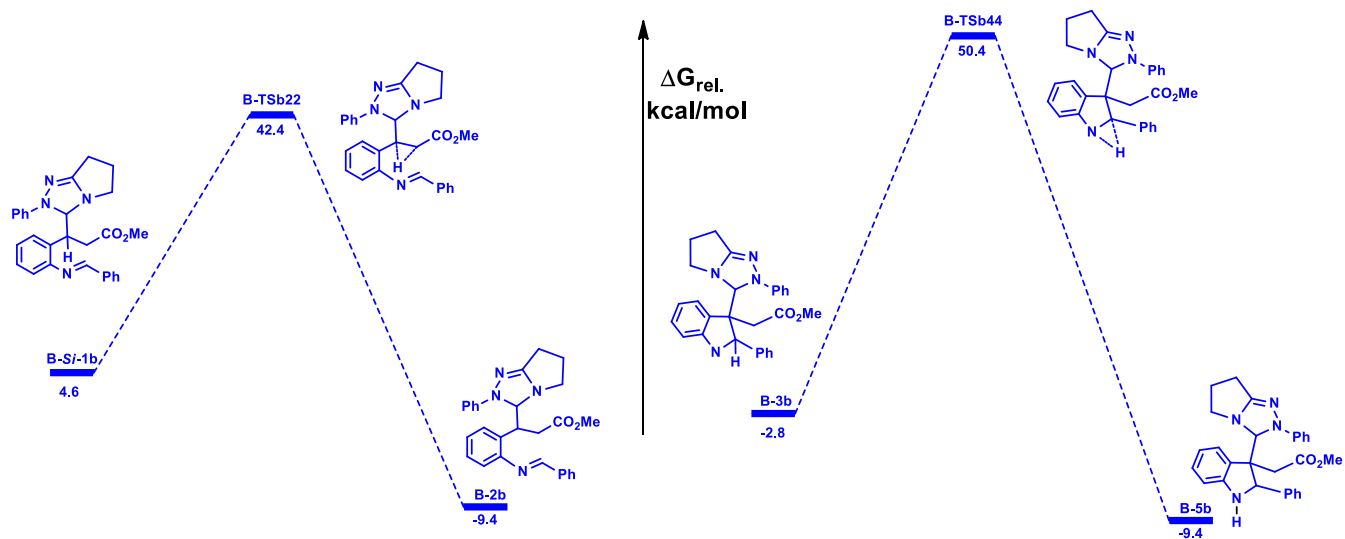

**Figure S7.** Energy profiles for the first and second direct [1,2] proton migration of path **b** for series **B**; the relative energies are given in kcal/mol.



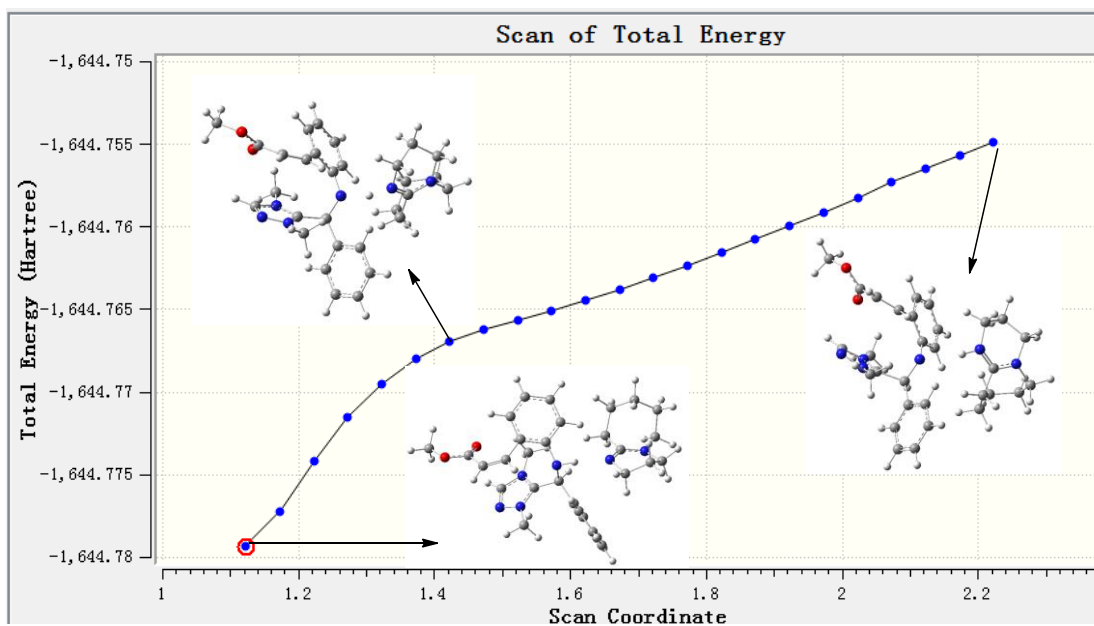

**Figure S8.** The calculation results of flexible scan to the N–H bond of **A-11a**.

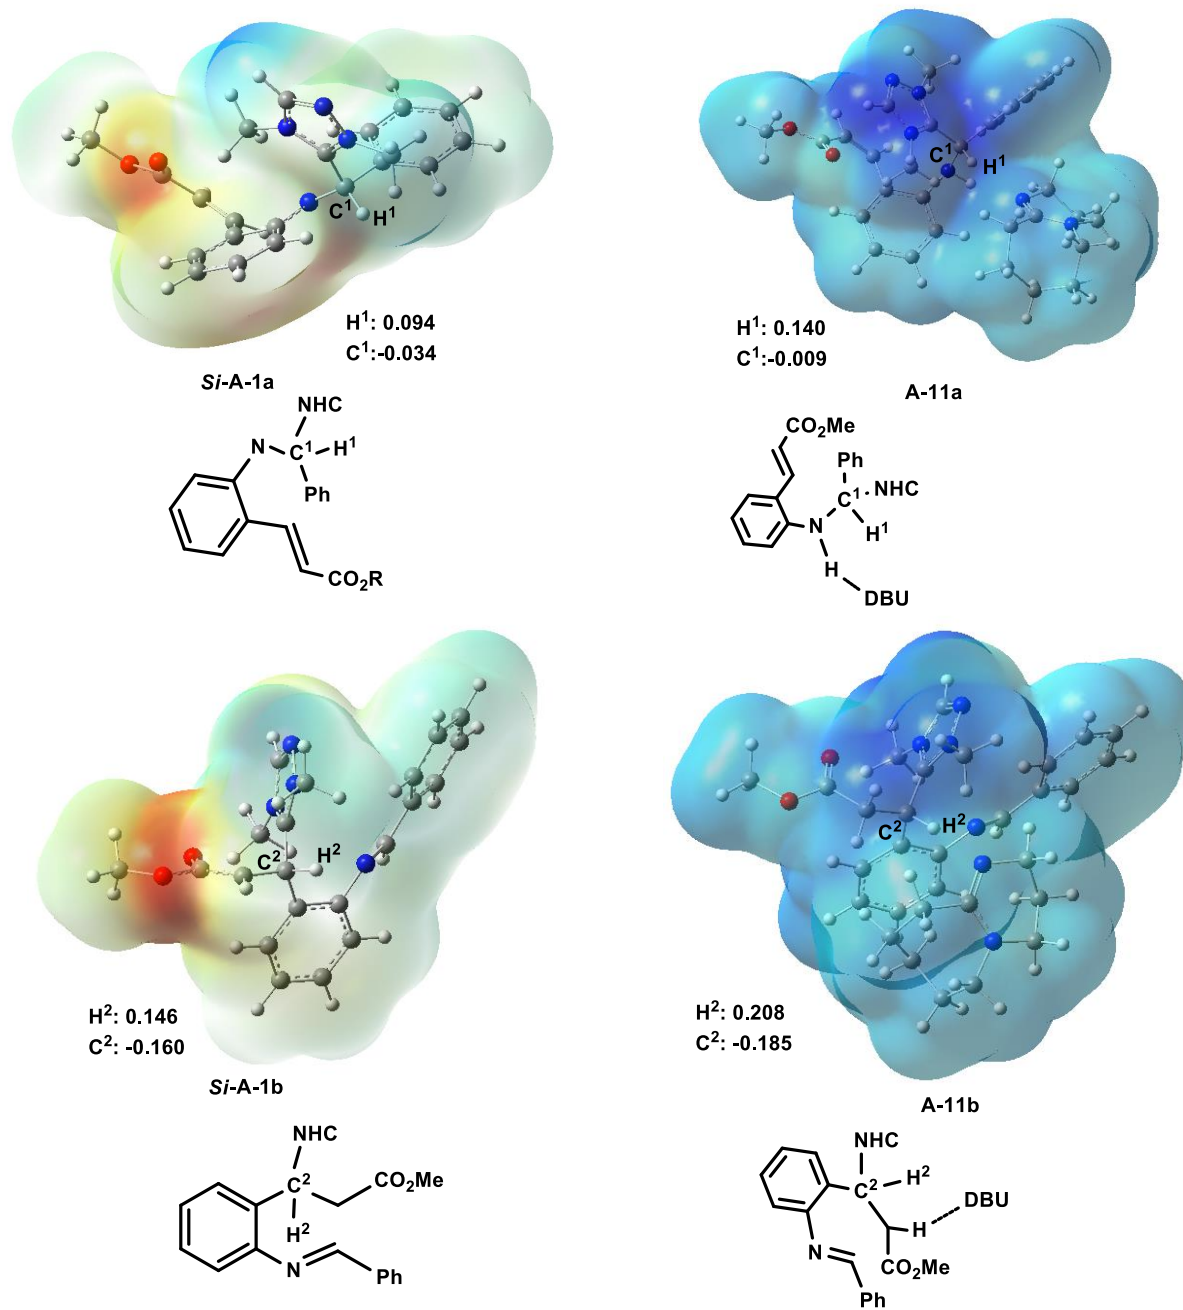

**Figure S9** The electrostatic potential analysis and the NPA charge distributions for intermediate **Si-A-1a**, **A-11a**, **Si-A-1b** and **A-11b**.

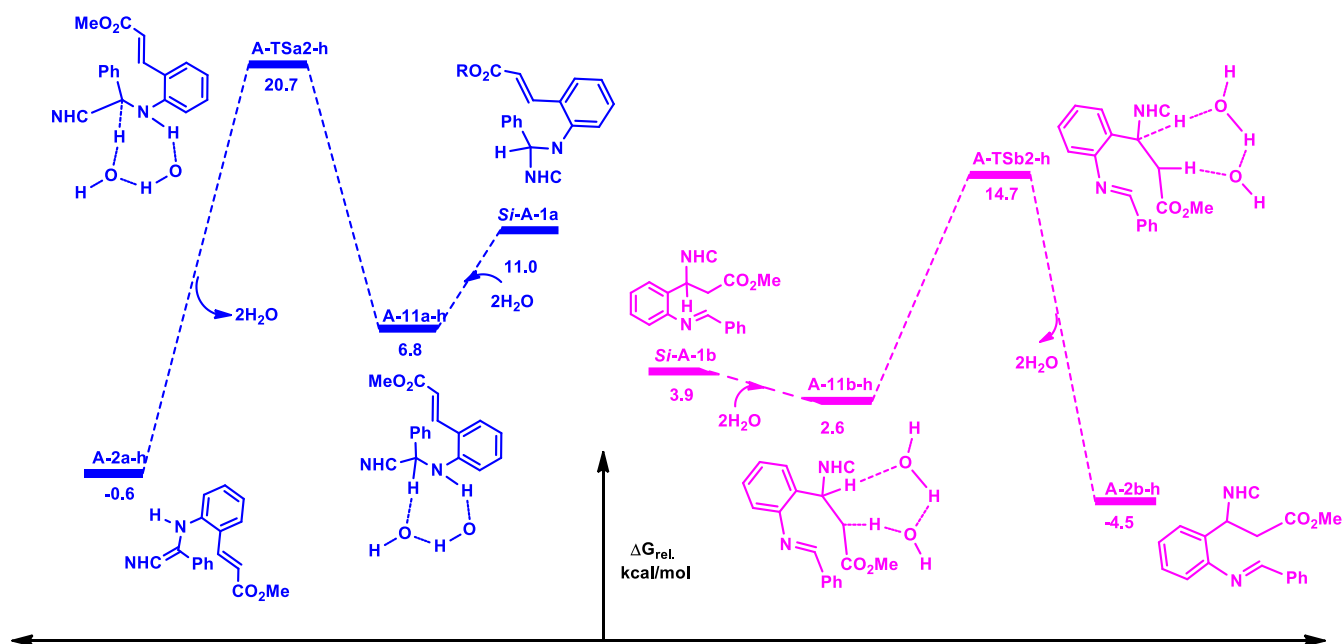

**Figure S10** Energy profiles for water assisted [1,2]-H shift for the first step t of path **a** and **b** for series **A**; the relative energies are given in kcal/mol.

**Table S1: The energies for species of path a in series A**

|                       | <b>E</b>     | <b>G</b>     |
|-----------------------|--------------|--------------|
| Si-A-TS <sub>a1</sub> | -1181.975453 | -1182.031670 |
| Re-A-TS <sub>a1</sub> | -1181.972795 | -1182.029289 |
| Si-A-1a               | -1181.987267 | -1182.042849 |
| Re-A-1a               | -1181.984410 | -1182.040442 |
| A-11a                 | -1644.109521 | -1644.178613 |
| A-TS <sub>a2</sub>    | -1644.087562 | -1644.155847 |
| A-2a                  | -1182.017490 | -1182.070367 |
| A-TS <sub>a3</sub>    | -1181.998623 | -1182.049603 |
| A-3a                  | -1181.999703 | -1182.051214 |
| A-4a                  | -1334.758132 | -1334.816149 |
| A-TS <sub>a4</sub>    | -1334.751057 | -1334.806319 |
| A-5a                  | -1334.751311 | -1334.807516 |
| A-TS <sub>a5</sub>    | -1334.747342 | -1334.805181 |
| A-6a                  | -1181.998402 | -1182.049782 |
| A-TS <sub>a6</sub>    | -1181.995945 | -1182.047027 |

**Table S2 The energies for species of path b in series A**

|           | <b>E</b>     | <b>G</b>     |
|-----------|--------------|--------------|
| Si-A-TSb1 | -1181.973010 | -1182.028981 |
| Re-A-TSb1 | -1181.969491 | -1182.026852 |
| Si-A-1b   | -1182.002927 | -1182.057623 |
| Re- A-1b  | -1182.000265 | -1182.056827 |
| A-11b     | -1644.132205 | -1644.201357 |
| A-TSb2    | -1644.120892 | -1644.187643 |
| A-2b      | -1182.026987 | -1182.081648 |
| A-TSb3    | -1181.998545 | -1182.053108 |
| A-3b      | -1182.004937 | -1182.056810 |
| A-4b      | -1334.773827 | -1334.831595 |
| A-TSb4    | -1334.744884 | -1334.802745 |
| A-5b      | -1181.982588 | -1182.034293 |
| A-TSb5    | -1181.975060 | -1182.028398 |

# Cartesian coordinates of the optimized species for series A

## Si-A-TSa1

|   |              |              |              |
|---|--------------|--------------|--------------|
| C | -2.817627000 | -2.739161000 | -1.467361000 |
| C | -1.506029000 | -3.191145000 | -1.368729000 |
| C | -0.439960000 | -2.294925000 | -1.341239000 |
| C | -0.662235000 | -0.904390000 | -1.425272000 |
| C | -2.007841000 | -0.457186000 | -1.510241000 |
| C | -3.057611000 | -1.367645000 | -1.531645000 |
| C | -2.241697000 | 0.994392000  | -1.587647000 |
| N | 0.295087000  | 0.073637000  | -1.275003000 |
| C | -3.088936000 | 1.726496000  | -0.849341000 |
| C | -3.823529000 | 1.237112000  | 0.338767000  |
| C | 1.540000000  | -0.326725000 | -1.062899000 |
| O | -3.561162000 | 0.273188000  | 1.024593000  |
| C | 2.572045000  | 0.748634000  | -0.910251000 |
| C | 3.881674000  | 0.542971000  | -1.343435000 |
| C | 4.841735000  | 1.542506000  | -1.195653000 |
| C | 4.495527000  | 2.754217000  | -0.606544000 |
| C | 3.184369000  | 2.968499000  | -0.179839000 |
| C | 2.227332000  | 1.973687000  | -0.333265000 |
| O | -4.847815000 | 2.067437000  | 0.628680000  |
| C | -5.593618000 | 1.713757000  | 1.788787000  |
| H | -3.644009000 | -3.441144000 | -1.488975000 |
| H | -1.305207000 | -4.257044000 | -1.305528000 |
| H | 0.568158000  | -2.680979000 | -1.240434000 |
| H | -4.074999000 | -0.992308000 | -1.598833000 |
| H | -1.659387000 | 1.519730000  | -2.342619000 |
| H | -3.242443000 | 2.775946000  | -1.077944000 |
| H | 1.940775000  | -1.228496000 | -1.549528000 |
| H | 4.146420000  | -0.398999000 | -1.819118000 |
| H | 5.855330000  | 1.376647000  | -1.547159000 |
| H | 5.241499000  | 3.533374000  | -0.486686000 |
| H | 2.910237000  | 3.917721000  | 0.270073000  |
| H | 1.195233000  | 2.126992000  | -0.032847000 |
| H | -6.364595000 | 2.475314000  | 1.893555000  |
| H | -6.043447000 | 0.725565000  | 1.669264000  |
| H | -4.948513000 | 1.696749000  | 2.670314000  |
| N | 0.713364000  | -0.735728000 | 1.746715000  |
| N | 2.547005000  | -1.290926000 | 2.843183000  |
| N | 2.692945000  | -1.411365000 | 1.493627000  |
| C | 1.605632000  | -1.087206000 | 0.783005000  |
| C | 1.320599000  | -0.879590000 | 2.963436000  |

|   |              |              |              |
|---|--------------|--------------|--------------|
| H | 0.827378000  | -0.679707000 | 3.902886000  |
| C | 3.978891000  | -1.822945000 | 0.965355000  |
| H | 4.362996000  | -2.634120000 | 1.583525000  |
| H | 3.831785000  | -2.167755000 | -0.057430000 |
| H | 4.674274000  | -0.981047000 | 0.971876000  |
| C | -0.684038000 | -0.327593000 | 1.563825000  |
| H | -0.733116000 | 0.520151000  | 0.880768000  |
| H | -1.265781000 | -1.146732000 | 1.140768000  |
| H | -1.087692000 | -0.056728000 | 2.539345000  |

**Re-A-TS<sub>a1</sub>**

|   |              |              |              |
|---|--------------|--------------|--------------|
| C | 2.813474000  | -2.726855000 | -1.508136000 |
| C | 1.501291000  | -3.175131000 | -1.403424000 |
| C | 0.439361000  | -2.275054000 | -1.356678000 |
| C | 0.665531000  | -0.884619000 | -1.427422000 |
| C | 2.011748000  | -0.441552000 | -1.516416000 |
| C | 3.057718000  | -1.355594000 | -1.557281000 |
| C | 2.250208000  | 1.010215000  | -1.579794000 |
| N | -0.289734000 | 0.095678000  | -1.267979000 |
| C | 3.099434000  | 1.732292000  | -0.834360000 |
| C | 3.834123000  | 1.226496000  | 0.347067000  |
| C | -1.533940000 | -0.305753000 | -1.053133000 |
| O | 3.583472000  | 0.242747000  | 1.007360000  |
| C | -2.566770000 | 0.769250000  | -0.897585000 |
| C | -3.869614000 | 0.573911000  | -1.355737000 |
| C | -4.830696000 | 1.572559000  | -1.205527000 |
| C | -4.491986000 | 2.772467000  | -0.588246000 |
| C | -3.187665000 | 2.975949000  | -0.135656000 |
| C | -2.229576000 | 1.982454000  | -0.292012000 |
| O | 4.844289000  | 2.066071000  | 0.662170000  |
| C | 5.586399000  | 1.696272000  | 1.819621000  |
| H | 3.637116000  | -3.431481000 | -1.544408000 |
| H | 1.296875000  | -4.240947000 | -1.350549000 |
| H | -0.569322000 | -2.659186000 | -1.252460000 |
| H | 4.075848000  | -0.982811000 | -1.626418000 |
| H | 1.667474000  | 1.545045000  | -2.327809000 |
| H | 3.252115000  | 2.784780000  | -1.048974000 |
| H | -1.936391000 | -1.202886000 | -1.547832000 |
| H | -4.127351000 | -0.359694000 | -1.851873000 |
| H | -5.838265000 | 1.416063000  | -1.578211000 |
| H | -5.238222000 | 3.551195000  | -0.466985000 |
| H | -2.919600000 | 3.915603000  | 0.337274000  |
| H | -1.202887000 | 2.127179000  | 0.030349000  |
| H | 6.351069000  | 2.461457000  | 1.942889000  |
| H | 4.936446000  | 1.657903000  | 2.696944000  |

|   |              |              |              |
|---|--------------|--------------|--------------|
| H | 6.044026000  | 0.713685000  | 1.684542000  |
| N | -2.714689000 | -1.440304000 | 1.479751000  |
| N | -1.231127000 | -0.911097000 | 3.007673000  |
| N | -0.737595000 | -0.754236000 | 1.744951000  |
| C | -1.607060000 | -1.074914000 | 0.780299000  |
| C | -2.445560000 | -1.325081000 | 2.815936000  |
| H | -3.151973000 | -1.555402000 | 3.599506000  |
| C | 0.655580000  | -0.327419000 | 1.596152000  |
| H | 1.268582000  | -1.155242000 | 1.237553000  |
| H | 0.708216000  | 0.484321000  | 0.870727000  |
| H | 0.993074000  | -0.005473000 | 2.578583000  |
| C | -3.981755000 | -1.850450000 | 0.897188000  |
| H | -4.637554000 | -0.987887000 | 0.762024000  |
| H | -3.785994000 | -2.309009000 | -0.071883000 |
| H | -4.454832000 | -2.584702000 | 1.550857000  |

**Si-A-1a**

|   |              |              |              |
|---|--------------|--------------|--------------|
| C | 2.617345000  | 2.687128000  | -1.567839000 |
| C | 1.287036000  | 3.089227000  | -1.474176000 |
| C | 0.254840000  | 2.164651000  | -1.364996000 |
| C | 0.511608000  | 0.762868000  | -1.351097000 |
| C | 1.887671000  | 0.372802000  | -1.470146000 |
| C | 2.898268000  | 1.321422000  | -1.562733000 |
| C | 2.165540000  | -1.064000000 | -1.499254000 |
| N | -0.380498000 | -0.223700000 | -1.124868000 |
| C | 3.095966000  | -1.742837000 | -0.804517000 |
| C | 3.879874000  | -1.197716000 | 0.320943000  |
| C | -1.672253000 | 0.213603000  | -0.759044000 |
| O | 3.620576000  | -0.234007000 | 1.011629000  |
| C | -2.638679000 | -0.958645000 | -0.594646000 |
| C | -3.971187000 | -0.859366000 | -0.992143000 |
| C | -4.847562000 | -1.927647000 | -0.807863000 |
| C | -4.393215000 | -3.104052000 | -0.221594000 |
| C | -3.056676000 | -3.215096000 | 0.159976000  |
| C | -2.183116000 | -2.150356000 | -0.028456000 |
| O | 4.955968000  | -1.979579000 | 0.567775000  |
| C | 5.750302000  | -1.568600000 | 1.673763000  |
| H | 3.414630000  | 3.416409000  | -1.653851000 |
| H | 1.044080000  | 4.149242000  | -1.486136000 |
| H | -0.765790000 | 2.534768000  | -1.307942000 |
| H | 3.925628000  | 0.974848000  | -1.642844000 |
| H | 1.531769000  | -1.638965000 | -2.174416000 |
| H | 3.276918000  | -2.791517000 | -1.016175000 |
| H | -2.157584000 | 0.940563000  | -1.448247000 |
| H | -4.320058000 | 0.046928000  | -1.482164000 |
| H | -5.879350000 | -1.843425000 | -1.134400000 |



|   |              |              |              |
|---|--------------|--------------|--------------|
| H | -5.073045000 | -3.937759000 | -0.077854000 |
| H | -2.692933000 | -4.140677000 | 0.595308000  |
| H | -1.128834000 | -2.233975000 | 0.215266000  |
| H | 6.557886000  | -2.295260000 | 1.750089000  |
| H | 6.151389000  | -0.565814000 | 1.509060000  |
| H | 5.157312000  | -1.556781000 | 2.591463000  |
| N | -0.690409000 | 0.845942000  | 1.565866000  |
| N | -2.274510000 | 2.169616000  | 2.360377000  |
| N | -2.568733000 | 1.741235000  | 1.108727000  |
| C | -1.628011000 | 0.942083000  | 0.599706000  |
| C | -1.125793000 | 1.613957000  | 2.607234000  |
| H | -0.564818000 | 1.737022000  | 3.521064000  |
| C | -3.822241000 | 2.152520000  | 0.496068000  |
| H | -4.133264000 | 3.066464000  | 0.998226000  |
| H | -3.659154000 | 2.341605000  | -0.565217000 |
| H | -4.573988000 | 1.371858000  | 0.623020000  |
| C | 0.630482000  | 0.184844000  | 1.559530000  |
| H | 0.576797000  | -0.719881000 | 0.960136000  |
| H | 1.370838000  | 0.847861000  | 1.109907000  |
| H | 0.887076000  | -0.027221000 | 2.597467000  |

**Re- A-1a**

|   |              |              |              |
|---|--------------|--------------|--------------|
| C | 2.629943000  | -2.619773000 | -1.663010000 |
| C | 1.306041000  | -3.035611000 | -1.549153000 |
| C | 0.269625000  | -2.122738000 | -1.390277000 |
| C | 0.514193000  | -0.719512000 | -1.346349000 |
| C | 1.884376000  | -0.315635000 | -1.478525000 |
| C | 2.899752000  | -1.252459000 | -1.622230000 |
| C | 2.153879000  | 1.123438000  | -1.469957000 |
| N | -0.384594000 | 0.255093000  | -1.085836000 |
| C | 3.096263000  | 1.783516000  | -0.773972000 |
| C | 3.905519000  | 1.203588000  | 0.316209000  |
| C | -1.663430000 | -0.214355000 | -0.715449000 |
| O | 3.668197000  | 0.211656000  | 0.972356000  |
| C | -2.660308000 | 0.930431000  | -0.561501000 |
| C | -3.892115000 | 0.903794000  | -1.212607000 |
| C | -4.797601000 | 1.953332000  | -1.061185000 |
| C | -4.473773000 | 3.036332000  | -0.251250000 |
| C | -3.237252000 | 3.074119000  | 0.393066000  |
| C | -2.334521000 | 2.029185000  | 0.236124000  |
| O | 4.979229000  | 1.986778000  | 0.573614000  |
| C | 5.794284000  | 1.541349000  | 1.650792000  |
| H | 3.430857000  | -3.339619000 | -1.786342000 |
| H | 1.071339000  | -4.097060000 | -1.583149000 |
| H | -0.745304000 | -2.505530000 | -1.315820000 |
| H | 3.922388000  | -0.894623000 | -1.711873000 |

|   |              |              |              |
|---|--------------|--------------|--------------|
| H | 1.502077000  | 1.715865000  | -2.111761000 |
| H | 3.266567000  | 2.840048000  | -0.952790000 |
| H | -2.132477000 | -0.955513000 | -1.402679000 |
| H | -4.133883000 | 0.066306000  | -1.863931000 |
| H | -5.748812000 | 1.926743000  | -1.583450000 |
| H | -5.176533000 | 3.854377000  | -0.130205000 |
| H | -2.974796000 | 3.926109000  | 1.012272000  |
| H | -1.354480000 | 2.064490000  | 0.703305000  |
| H | 6.598695000  | 2.270080000  | 1.740377000  |
| H | 5.216433000  | 1.492202000  | 2.576921000  |
| H | 6.198326000  | 0.547549000  | 1.443749000  |
| N | -2.579312000 | -1.738855000 | 1.142914000  |
| N | -1.014869000 | -1.623707000 | 2.677270000  |
| N | -0.675717000 | -0.885352000 | 1.590056000  |
| C | -1.606110000 | -0.945493000 | 0.638606000  |
| C | -2.173004000 | -2.130566000 | 2.385335000  |
| H | -2.751255000 | -2.774379000 | 3.030654000  |
| C | 0.655169000  | -0.252421000 | 1.595278000  |
| H | 1.382521000  | -0.940552000 | 1.161086000  |
| H | 0.623774000  | 0.645718000  | 0.983246000  |
| H | 0.889969000  | -0.051085000 | 2.638236000  |
| C | -3.821329000 | -2.107182000 | 0.474766000  |
| H | -4.368214000 | -2.786065000 | 1.128457000  |
| H | -4.415153000 | -1.212215000 | 0.284167000  |
| H | -3.597606000 | -2.610606000 | -0.467320000 |

**A-11a**

|   |              |              |              |
|---|--------------|--------------|--------------|
| C | 1.712326000  | -3.603741000 | 1.239317000  |
| C | 0.340954000  | -3.348823000 | 1.211605000  |
| C | -0.123687000 | -2.039461000 | 1.236116000  |
| C | 2.608987000  | -2.547891000 | 1.319491000  |
| C | 5.025002000  | -0.803816000 | 0.119813000  |
| C | 0.164338000  | 0.979242000  | -0.026032000 |
| O | 4.481570000  | -1.444101000 | -0.761613000 |
| C | -0.549883000 | 2.319840000  | 0.044644000  |
| C | -0.700552000 | 3.012252000  | 1.244762000  |
| C | -1.369290000 | 4.234712000  | 1.264360000  |
| C | -1.884935000 | 4.771765000  | 0.088381000  |
| C | -1.737106000 | 4.079043000  | -1.113056000 |
| C | -1.075725000 | 2.856068000  | -1.131816000 |
| O | 6.346047000  | -0.751069000 | 0.272033000  |
| C | 7.113536000  | -1.515728000 | -0.664588000 |
| H | 2.079149000  | -4.624210000 | 1.232879000  |
| H | -0.364909000 | -4.173060000 | 1.184829000  |
| H | -1.188051000 | -1.814739000 | 1.218575000  |
| H | 3.671559000  | -2.748894000 | 1.398601000  |

|   |              |              |              |
|---|--------------|--------------|--------------|
| H | 2.700470000  | 0.671932000  | 2.233756000  |
| H | 4.947111000  | 0.889009000  | 1.484173000  |
| H | -0.295204000 | 2.595531000  | 2.161708000  |
| H | -1.487320000 | 4.766224000  | 2.202898000  |
| H | -2.405201000 | 5.723514000  | 0.106430000  |
| H | -2.144366000 | 4.487319000  | -2.031935000 |
| H | -0.979732000 | 2.306527000  | -2.065990000 |
| H | 6.809542000  | -2.563169000 | -0.636987000 |
| H | 6.968349000  | -1.127107000 | -1.674662000 |
| H | 8.150264000  | -1.403822000 | -0.356354000 |
| N | 2.050993000  | 0.210766000  | -1.556500000 |
| N | 3.441864000  | 1.911226000  | -1.441807000 |
| N | 2.361401000  | 2.121048000  | -0.658689000 |
| C | 1.503014000  | 1.105320000  | -0.709337000 |
| C | 4.345581000  | 0.063212000  | 1.117288000  |
| C | 3.091800000  | -0.096087000 | 1.567092000  |
| C | 2.162512000  | -1.218849000 | 1.345523000  |
| C | 0.779490000  | -0.973173000 | 1.291844000  |
| N | 0.294509000  | 0.375166000  | 1.306643000  |
| N | -4.751792000 | -0.459600000 | -0.594293000 |
| C | -5.449702000 | -1.403343000 | -1.461424000 |
| C | -5.661868000 | -2.767943000 | -0.794580000 |
| C | -4.392854000 | -3.260809000 | -0.093042000 |
| C | -3.120054000 | -3.098941000 | -0.931446000 |
| C | -2.691682000 | -1.628497000 | -1.199595000 |
| C | -3.407969000 | -0.589143000 | -0.360604000 |
| C | -3.444307000 | 1.107463000  | 1.254055000  |
| C | -4.862799000 | 0.658927000  | 1.584860000  |
| C | -5.592969000 | 0.352711000  | 0.287655000  |
| H | -6.405528000 | -0.951081000 | -1.740307000 |
| H | -4.888644000 | -1.524113000 | -2.391567000 |
| H | -6.479502000 | -2.709358000 | -0.067574000 |
| H | -5.975184000 | -3.482599000 | -1.564166000 |
| H | -4.263291000 | -2.718331000 | 0.851997000  |
| H | -4.514400000 | -4.314497000 | 0.174775000  |
| H | -3.243612000 | -3.621699000 | -1.886424000 |
| H | -2.300347000 | -3.604414000 | -0.410670000 |
| H | -2.827465000 | -1.374362000 | -2.256072000 |
| H | -1.628815000 | -1.511903000 | -0.979804000 |
| H | -2.886433000 | 1.313238000  | 2.174641000  |
| H | -3.466314000 | 2.053610000  | 0.690691000  |
| H | -5.402855000 | 1.425274000  | 2.145992000  |
| H | -4.817243000 | -0.243130000 | 2.205043000  |
| H | -5.873881000 | 1.280382000  | -0.227032000 |
| H | -6.515142000 | -0.203014000 | 0.489950000  |

|   |              |              |              |
|---|--------------|--------------|--------------|
| H | -0.453823000 | 0.343704000  | -0.677297000 |
| C | 1.589210000  | -1.139725000 | -1.893156000 |
| H | 1.681341000  | -1.274873000 | -2.970709000 |
| H | 2.217844000  | -1.851794000 | -1.355161000 |
| H | 0.550069000  | -1.252617000 | -1.591254000 |
| C | 2.309631000  | 3.338410000  | 0.150034000  |
| H | 1.553541000  | 4.018295000  | -0.244146000 |
| H | 2.071887000  | 3.072621000  | 1.179499000  |
| H | 3.301129000  | 3.781489000  | 0.084184000  |
| C | 3.233495000  | 0.743643000  | -1.976802000 |
| H | 3.907400000  | 0.234063000  | -2.647542000 |
| N | -2.716080000 | 0.103114000  | 0.484124000  |
| H | -0.676571000 | 0.339537000  | 1.627151000  |

**A-TSa2**

|   |              |              |              |
|---|--------------|--------------|--------------|
| C | 3.572438000  | -0.504179000 | 3.626429000  |
| C | 2.272632000  | -0.616917000 | 4.118127000  |
| C | 1.196782000  | -0.277682000 | 3.318162000  |
| C | 3.753403000  | -0.035791000 | 2.337260000  |
| C | 4.319353000  | -1.093347000 | -0.596963000 |
| C | -0.049109000 | 0.850835000  | -0.064439000 |
| O | 3.657404000  | -2.027099000 | -0.192573000 |
| C | -0.189106000 | 2.335437000  | -0.263903000 |
| C | 0.437318000  | 3.251843000  | 0.588115000  |
| C | 0.246145000  | 4.620285000  | 0.416752000  |
| C | -0.582592000 | 5.094448000  | -0.597804000 |
| C | -1.238451000 | 4.190440000  | -1.430057000 |
| C | -1.053723000 | 2.822411000  | -1.253346000 |
| O | 5.565636000  | -1.219535000 | -1.055429000 |
| C | 6.102725000  | -2.545805000 | -1.024748000 |
| H | 4.425642000  | -0.765463000 | 4.241024000  |
| H | 2.095092000  | -0.972035000 | 5.127982000  |
| H | 0.185663000  | -0.381457000 | 3.704904000  |
| H | 4.757721000  | 0.088313000  | 1.942158000  |
| H | 2.672872000  | 1.899460000  | -0.035248000 |
| H | 4.201933000  | 0.862688000  | -1.577475000 |
| H | 1.067536000  | 2.886668000  | 1.395240000  |
| H | 0.745396000  | 5.319009000  | 1.080263000  |
| H | -0.728906000 | 6.161237000  | -0.728854000 |
| H | -1.905330000 | 4.550817000  | -2.206931000 |
| H | -1.589698000 | 2.115010000  | -1.885292000 |
| H | 6.116719000  | -2.923664000 | -0.000951000 |
| H | 5.497350000  | -3.212338000 | -1.642109000 |
| H | 7.111975000  | -2.464720000 | -1.421591000 |
| N | 0.839163000  | -1.274984000 | -1.027330000 |
| N | 1.657342000  | -0.617044000 | -2.963694000 |

|   |              |              |              |
|---|--------------|--------------|--------------|
| N | 1.118686000  | 0.437670000  | -2.284584000 |
| C | 0.628632000  | 0.070401000  | -1.085093000 |
| C | 3.849707000  | 0.315614000  | -0.707493000 |
| C | 3.029302000  | 0.890790000  | 0.180945000  |
| C | 2.680951000  | 0.328272000  | 1.504921000  |
| C | 1.368192000  | 0.197388000  | 2.004010000  |
| N | 0.197344000  | 0.411783000  | 1.278499000  |
| N | -4.770715000 | -0.588459000 | -0.080003000 |
| C | -5.590287000 | -1.676542000 | -0.616282000 |
| C | -5.357756000 | -2.988053000 | 0.138501000  |
| C | -3.863754000 | -3.274886000 | 0.323421000  |
| C | -3.040281000 | -3.016805000 | -0.943284000 |
| C | -2.880544000 | -1.520020000 | -1.338886000 |
| C | -3.458759000 | -0.513939000 | -0.367487000 |
| C | -3.209916000 | 1.441316000  | 0.987014000  |
| C | -4.317876000 | 0.863540000  | 1.857823000  |
| C | -5.382157000 | 0.254503000  | 0.956580000  |
| H | -6.634453000 | -1.360076000 | -0.556866000 |
| H | -5.364858000 | -1.800036000 | -1.678739000 |
| H | -5.852049000 | -2.955317000 | 1.115299000  |
| H | -5.832267000 | -3.795414000 | -0.429400000 |
| H | -3.467527000 | -2.661502000 | 1.143205000  |
| H | -3.731693000 | -4.315169000 | 0.632580000  |
| H | -3.487858000 | -3.563406000 | -1.779926000 |
| H | -2.043556000 | -3.443566000 | -0.803467000 |
| H | -3.345648000 | -1.329827000 | -2.312186000 |
| H | -1.824207000 | -1.266578000 | -1.459169000 |
| H | -2.386203000 | 1.848136000  | 1.582012000  |
| H | -3.590336000 | 2.267871000  | 0.372670000  |
| H | -4.765799000 | 1.634378000  | 2.488165000  |
| H | -3.901198000 | 0.092194000  | 2.514679000  |
| H | -5.979011000 | 1.036397000  | 0.472827000  |
| H | -6.063838000 | -0.374876000 | 1.537068000  |
| H | -1.390982000 | 0.501629000  | -0.144355000 |
| C | 0.556045000  | -2.197022000 | 0.070017000  |
| H | 0.612261000  | -3.207181000 | -0.336525000 |
| H | 1.307073000  | -2.080151000 | 0.851985000  |
| H | -0.446247000 | -2.006839000 | 0.456339000  |
| C | 1.340519000  | 1.762782000  | -2.855125000 |
| H | 0.425174000  | 2.160147000  | -3.293259000 |
| H | 1.697149000  | 2.448423000  | -2.087350000 |
| H | 2.096702000  | 1.627799000  | -3.625874000 |
| C | 1.483428000  | -1.629646000 | -2.178591000 |
| H | 1.814480000  | -2.637070000 | -2.380248000 |
| N | -2.668035000 | 0.402468000  | 0.117430000  |

H -0.639442000 0.191514000 1.801752000

**A-2a**

C 2.683748000 3.487556000 -0.556180000  
C 1.911625000 4.042011000 0.463454000  
C 0.753946000 3.411143000 0.885342000  
C 2.252848000 2.311394000 -1.151001000  
C 2.508655000 -1.046750000 -0.982964000  
C -1.289381000 0.290111000 0.596127000  
O 3.159222000 -0.371099000 -0.219781000  
C -2.676474000 0.169403000 0.140305000  
C -3.533937000 -0.842237000 0.611029000  
C -4.855094000 -0.923358000 0.185148000  
C -5.372168000 0.021485000 -0.697656000  
C -4.548138000 1.055768000 -1.140414000  
C -3.225174000 1.133350000 -0.726410000  
O 2.789423000 -2.347089000 -1.221078000  
C 3.872345000 -2.861346000 -0.448011000  
H 3.601969000 3.962929000 -0.881241000  
H 2.220333000 4.964496000 0.945885000  
H 0.173830000 3.829101000 1.704673000  
H 2.831490000 1.861075000 -1.951674000  
H -0.326166000 0.605083000 -2.069740000  
H 0.904141000 -1.409749000 -2.408589000  
H -1.296917000 2.153302000 1.519418000  
H -3.156970000 -1.553343000 1.342610000  
H -5.492650000 -1.715480000 0.567069000  
H -6.405937000 -0.035662000 -1.021658000

|   |              |              |              |
|---|--------------|--------------|--------------|
| H | -4.940807000 | 1.808182000  | -1.818086000 |
| H | -2.591714000 | 1.947445000  | -1.067886000 |
| H | 3.644259000  | -2.766734000 | 0.616479000  |
| H | 3.974055000  | -3.907021000 | -0.736183000 |
| H | 4.791505000  | -2.313267000 | -0.666026000 |
| N | -0.596382000 | -2.081426000 | 0.387676000  |
| N | 1.253694000  | -2.095836000 | 1.607459000  |
| N | 0.658642000  | -0.860958000 | 1.666559000  |
| C | -0.490290000 | -0.794108000 | 0.912400000  |
| C | 1.300268000  | -0.650793000 | -1.741385000 |
| C | 0.625866000  | 0.493030000  | -1.548058000 |
| C | 1.073249000  | 1.667019000  | -0.763474000 |
| C | 0.313466000  | 2.214533000  | 0.290639000  |
| N | -0.816253000 | 1.610225000  | 0.814632000  |
| C | 1.339668000  | 0.178459000  | 2.413666000  |
| H | 2.049087000  | 0.710010000  | 1.772769000  |
| H | 0.606204000  | 0.870851000  | 2.823440000  |
| H | 1.873763000  | -0.315350000 | 3.224963000  |
| C | -1.380041000 | -2.470113000 | -0.768775000 |
| H | -2.397398000 | -2.761070000 | -0.499235000 |
| H | -1.437940000 | -1.623107000 | -1.456950000 |
| H | -0.870184000 | -3.301679000 | -1.258630000 |
| C | 0.485273000  | -2.793615000 | 0.847758000  |
| H | 0.657425000  | -3.826200000 | 0.581938000  |

**A-TSa3**

|   |             |             |              |
|---|-------------|-------------|--------------|
| C | 2.242503000 | 3.751312000 | -0.735614000 |
| C | 1.689841000 | 4.213175000 | 0.456480000  |

|   |              |              |              |
|---|--------------|--------------|--------------|
| C | 0.702506000  | 3.478217000  | 1.113002000  |
| C | 1.791391000  | 2.556070000  | -1.296704000 |
| C | 2.071005000  | -0.931940000 | -1.112482000 |
| C | -0.893136000 | 0.215034000  | 0.339434000  |
| O | 2.516053000  | -0.535247000 | -0.027698000 |
| C | -2.343535000 | 0.063400000  | -0.016208000 |
| C | -3.139356000 | -1.005561000 | 0.414407000  |
| C | -4.491566000 | -1.069049000 | 0.090088000  |
| C | -5.085184000 | -0.051989000 | -0.650705000 |
| C | -4.314630000 | 1.036287000  | -1.054990000 |
| C | -2.962620000 | 1.094292000  | -0.740388000 |
| O | 2.654851000  | -2.005761000 | -1.741378000 |
| C | 3.770314000  | -2.550679000 | -1.061125000 |
| H | 3.026608000  | 4.318401000  | -1.226146000 |
| H | 2.041146000  | 5.143207000  | 0.892720000  |
| H | 0.288943000  | 3.816375000  | 2.059156000  |
| H | 2.205535000  | 2.174243000  | -2.225204000 |
| H | 0.595599000  | -0.979673000 | -2.674622000 |
| H | -1.493167000 | 1.829307000  | 1.506903000  |
| H | -2.701865000 | -1.792035000 | 1.023722000  |
| H | -5.084980000 | -1.911234000 | 0.432153000  |
| H | -6.140010000 | -0.099276000 | -0.899949000 |
| H | -4.768925000 | 1.844699000  | -1.619186000 |
| H | -2.373140000 | 1.954981000  | -1.047138000 |
| H | 3.477500000  | -2.954435000 | -0.086918000 |
| H | 4.150393000  | -3.352016000 | -1.696072000 |
| H | 4.544441000  | -1.795584000 | -0.901593000 |
| N | 0.630406000  | -1.031562000 | 1.958521000  |



|   |              |              |              |
|---|--------------|--------------|--------------|
| N | 0.684266000  | -3.010083000 | 0.974624000  |
| N | -0.165380000 | -2.170579000 | 0.326448000  |
| C | -0.227282000 | -0.958154000 | 0.900344000  |
| C | 0.938304000  | -0.440845000 | -1.801317000 |
| C | 0.793664000  | 1.828414000  | -0.664991000 |
| C | 0.267820000  | 2.287800000  | 0.538983000  |
| N | -0.654239000 | 1.401631000  | 1.134361000  |
| C | 0.146112000  | 0.594559000  | -1.239467000 |
| H | -0.681894000 | 0.866069000  | -1.901436000 |
| C | -0.861929000 | -2.699169000 | -0.838123000 |
| H | -1.650677000 | -3.382915000 | -0.512113000 |
| H | -1.283516000 | -1.876771000 | -1.407592000 |
| H | -0.118669000 | -3.222768000 | -1.438138000 |
| C | 1.239528000  | 0.057138000  | 2.723928000  |
| H | 1.801542000  | 0.683624000  | 2.028896000  |
| H | 0.480453000  | 0.632828000  | 3.243917000  |
| H | 1.921054000  | -0.405932000 | 3.438788000  |
| C | 1.168858000  | -2.281038000 | 1.930324000  |
| H | 1.915385000  | -2.612517000 | 2.635532000  |

**A-3a**

|   |              |              |              |
|---|--------------|--------------|--------------|
| C | 2.817857000  | 3.392926000  | -0.669686000 |
| C | 2.285567000  | 3.959535000  | 0.487004000  |
| C | 1.157745000  | 3.407840000  | 1.098063000  |
| C | 2.213396000  | 2.277187000  | -1.253632000 |
| C | 1.844989000  | -1.214354000 | -1.144541000 |
| C | -0.757381000 | 0.389133000  | 0.142119000  |
| O | 2.302996000  | -0.944980000 | -0.009548000 |

|   |              |              |              |
|---|--------------|--------------|--------------|
| C | -2.257941000 | 0.326303000  | -0.145131000 |
| C | -3.121517000 | -0.549931000 | 0.520055000  |
| C | -4.495769000 | -0.509678000 | 0.297880000  |
| C | -5.037258000 | 0.422808000  | -0.579818000 |
| C | -4.192917000 | 1.324340000  | -1.222260000 |
| C | -2.820791000 | 1.279958000  | -1.002970000 |
| O | 2.311290000  | -2.343080000 | -1.803390000 |
| C | 3.293932000  | -3.067368000 | -1.093455000 |
| H | 3.710539000  | 3.819320000  | -1.115564000 |
| H | 2.762661000  | 4.826588000  | 0.933020000  |
| H | 0.755847000  | 3.824045000  | 2.017509000  |
| H | 2.612635000  | 1.812005000  | -2.150225000 |
| H | 0.503801000  | -0.890195000 | -2.788256000 |
| H | -1.353246000 | 2.080917000  | 1.208155000  |
| H | -2.727809000 | -1.274791000 | 1.226491000  |
| H | -5.142340000 | -1.205410000 | 0.823085000  |
| H | -6.107659000 | 0.454679000  | -0.753715000 |
| H | -4.602212000 | 2.068412000  | -1.897841000 |
| H | -2.183282000 | 2.009779000  | -1.492204000 |
| H | 2.898983000  | -3.456947000 | -0.148531000 |
| H | 3.587388000  | -3.896750000 | -1.739907000 |
| H | 4.164299000  | -2.446478000 | -0.862898000 |
| N | 0.457697000  | -0.958549000 | 1.975088000  |
| N | 0.162399000  | -3.011771000 | 1.219089000  |
| N | -0.448282000 | -2.107932000 | 0.417053000  |
| C | -0.271827000 | -0.856850000 | 0.839673000  |
| C | 0.842851000  | -0.538563000 | -1.824067000 |
| C | 1.077105000  | 1.744385000  | -0.669669000 |

|   |              |              |              |
|---|--------------|--------------|--------------|
| C | 0.573706000  | 2.299120000  | 0.500240000  |
| N | -0.513674000 | 1.547032000  | 1.016985000  |
| C | 0.193161000  | 0.623373000  | -1.189793000 |
| H | -0.483058000 | 1.065093000  | -1.930147000 |
| C | -1.126741000 | -2.626016000 | -0.766939000 |
| H | -1.961834000 | -3.250419000 | -0.440414000 |
| H | -1.468557000 | -1.797451000 | -1.377478000 |
| H | -0.391800000 | -3.204509000 | -1.326384000 |
| C | 1.258487000  | 0.074909000  | 2.641646000  |
| H | 1.947392000  | 0.476676000  | 1.895534000  |
| H | 0.616919000  | 0.848482000  | 3.050185000  |
| H | 1.816607000  | -0.425302000 | 3.433458000  |
| C | 0.722103000  | -2.283711000 | 2.135691000  |
| H | 1.330922000  | -2.666806000 | 2.939678000  |

**A-4a**

|   |              |              |              |
|---|--------------|--------------|--------------|
| C | -3.577955000 | -2.509358000 | -1.320713000 |
| C | -2.890970000 | -3.709341000 | -1.139447000 |
| C | -1.552301000 | -3.715876000 | -0.743636000 |
| C | -2.936288000 | -1.284910000 | -1.118545000 |
| C | -2.159780000 | 1.832766000  | -0.062048000 |
| C | 0.660248000  | -0.822660000 | -0.040131000 |
| O | -2.523508000 | 1.952533000  | -1.244295000 |
| C | 1.913435000  | -0.487818000 | -0.847386000 |
| C | 3.051462000  | -1.283080000 | -0.645802000 |
| C | 4.241640000  | -1.001705000 | -1.305412000 |
| C | 4.310120000  | 0.087856000  | -2.173771000 |
| C | 3.184241000  | 0.877895000  | -2.373339000 |

|   |              |              |              |
|---|--------------|--------------|--------------|
| C | 1.985021000  | 0.598909000  | -1.715797000 |
| O | -2.702247000 | 2.662671000  | 0.894833000  |
| C | -3.659066000 | 3.583442000  | 0.400409000  |
| H | -4.618920000 | -2.527655000 | -1.626482000 |
| H | -3.401800000 | -4.653418000 | -1.300851000 |
| H | -1.017051000 | -4.647729000 | -0.585927000 |
| H | -3.443625000 | -0.337539000 | -1.273635000 |
| H | -1.259201000 | 0.760322000  | 1.515056000  |
| H | 1.092992000  | -2.761103000 | -0.665039000 |
| H | 3.016950000  | -2.113863000 | 0.057066000  |
| H | 5.113955000  | -1.625075000 | -1.136227000 |
| H | 5.238121000  | 0.315396000  | -2.688495000 |
| H | 3.221689000  | 1.730279000  | -3.043831000 |
| H | 1.139690000  | 1.263237000  | -1.890518000 |
| H | -4.495649000 | 3.068907000  | -0.079604000 |
| H | -4.010680000 | 4.146817000  | 1.266095000  |
| H | -3.215731000 | 4.261558000  | -0.334747000 |
| N | 0.281572000  | -1.040216000 | 2.478180000  |
| N | 1.730566000  | 0.380314000  | 3.322944000  |
| N | 1.812161000  | 0.361946000  | 1.969812000  |
| C | 0.936635000  | -0.490837000 | 1.429208000  |
| C | -1.168980000 | 0.971641000  | 0.451776000  |
| C | -1.601434000 | -1.287183000 | -0.737061000 |
| C | -0.928151000 | -2.488750000 | -0.559707000 |
| N | 0.400581000  | -2.283592000 | -0.098750000 |
| C | -0.683547000 | -0.104539000 | -0.486761000 |
| H | -0.514833000 | 0.378309000  | -1.455482000 |
| C | 2.744009000  | 1.326027000  | 1.359047000  |

|   |              |              |              |
|---|--------------|--------------|--------------|
| H | 3.227741000  | 1.810422000  | 2.204448000  |
| H | 3.476994000  | 0.804888000  | 0.746814000  |
| H | 2.176064000  | 2.059435000  | 0.781931000  |
| C | -0.851741000 | -1.969746000 | 2.473698000  |
| H | -1.638444000 | -1.575067000 | 1.828845000  |
| H | -0.529226000 | -2.942298000 | 2.110056000  |
| H | -1.214295000 | -2.034367000 | 3.499237000  |
| C | 0.794218000  | -0.472380000 | 3.604127000  |
| H | 0.455693000  | -0.715405000 | 4.599603000  |
| O | 0.545044000  | 3.267875000  | 0.274650000  |
| H | 0.068201000  | 3.930391000  | 0.786936000  |
| H | -0.014769000 | 2.436760000  | 0.380843000  |
| O | -0.118189000 | 2.791603000  | -2.449338000 |
| H | 0.137590000  | 3.213339000  | -1.612397000 |
| H | -1.039315000 | 2.524720000  | -2.288053000 |

**A-TSa4**

|   |              |              |              |
|---|--------------|--------------|--------------|
| C | -3.287429000 | -2.862175000 | -1.101091000 |
| C | -2.550657000 | -3.939424000 | -0.612413000 |
| C | -1.268881000 | -3.750408000 | -0.096608000 |
| C | -2.755436000 | -1.571213000 | -1.087654000 |
| C | -2.505832000 | 1.590848000  | -0.269372000 |
| C | 0.716292000  | -0.623808000 | 0.125278000  |
| O | -2.777492000 | 1.578013000  | -1.460069000 |
| C | 1.944315000  | -0.466673000 | -0.777158000 |
| C | 3.104600000  | -1.165116000 | -0.406137000 |
| C | 4.272394000  | -1.059930000 | -1.149864000 |
| C | 4.298500000  | -0.243186000 | -2.280006000 |
| C | 3.153815000  | 0.453203000  | -2.646874000 |

|   |              |              |              |
|---|--------------|--------------|--------------|
| C | 1.975496000  | 0.349839000  | -1.904788000 |
| O | -3.296306000 | 2.236223000  | 0.618934000  |
| C | -4.405289000 | 2.919457000  | 0.045329000  |
| H | -4.280889000 | -3.027880000 | -1.504319000 |
| H | -2.975276000 | -4.938167000 | -0.632205000 |
| H | -0.688502000 | -4.583292000 | 0.289092000  |
| H | -3.313779000 | -0.731419000 | -1.486946000 |
| H | -1.526823000 | 0.795945000  | 1.409923000  |
| H | 1.267979000  | -2.635625000 | 0.051858000  |
| H | 3.111327000  | -1.773296000 | 0.497528000  |
| H | 5.159312000  | -1.606299000 | -0.845123000 |
| H | 5.208316000  | -0.152405000 | -2.864871000 |
| H | 3.161039000  | 1.096940000  | -3.520286000 |
| H | 1.117717000  | 0.939193000  | -2.220471000 |
| H | -5.072490000 | 2.217922000  | -0.461315000 |
| H | -4.920311000 | 3.403472000  | 0.874272000  |
| H | -4.067732000 | 3.661425000  | -0.681727000 |
| N | 0.410805000  | -0.335905000 | 2.638762000  |
| N | 1.893639000  | 1.201009000  | 3.153707000  |
| N | 1.923887000  | 0.940136000  | 1.824419000  |
| C | 1.023846000  | 0.016257000  | 1.481678000  |
| C | -1.308793000 | 1.029569000  | 0.366589000  |
| C | -1.477336000 | -1.373440000 | -0.576910000 |
| C | -0.752320000 | -2.460599000 | -0.100498000 |
| N | 0.506958000  | -2.069999000 | 0.409741000  |
| C | -0.671047000 | -0.097145000 | -0.450734000 |
| H | -0.501367000 | 0.331312000  | -1.442793000 |
| C | 2.839247000  | 1.754311000  | 1.004188000  |

|   |              |              |              |
|---|--------------|--------------|--------------|
| H | 3.276810000  | 2.460783000  | 1.706591000  |
| H | 3.609347000  | 1.118172000  | 0.570107000  |
| H | 2.210946000  | 2.264888000  | 0.252666000  |
| C | -0.654539000 | -1.315943000 | 2.863116000  |
| H | -1.403839000 | -1.240445000 | 2.076213000  |
| H | -0.236760000 | -2.320745000 | 2.865803000  |
| H | -1.111693000 | -1.076799000 | 3.823608000  |
| C | 0.968555000  | 0.419888000  | 3.622050000  |
| H | 0.669600000  | 0.364043000  | 4.657579000  |
| O | 0.520482000  | 2.761337000  | -0.301585000 |
| H | 0.373282000  | 3.668479000  | -0.008602000 |
| H | -0.468541000 | 1.964230000  | 0.223666000  |
| O | -0.262948000 | 2.333342000  | -2.798569000 |
| H | 0.025965000  | 2.633977000  | -1.893597000 |
| H | -1.197559000 | 2.121705000  | -2.681478000 |

**A-5a**

|   |              |              |              |
|---|--------------|--------------|--------------|
| C | 2.833925000  | 3.464006000  | -0.764008000 |
| C | 1.924588000  | 4.380557000  | -0.237971000 |
| C | 0.695448000  | 3.960372000  | 0.270233000  |
| C | 2.528969000  | 2.101766000  | -0.799085000 |
| C | 2.589729000  | -1.383860000 | -0.119142000 |
| C | -0.748510000 | 0.554514000  | 0.263112000  |
| O | 3.050156000  | -1.004103000 | -1.173737000 |
| C | -1.838945000 | 0.367241000  | -0.799276000 |
| C | -3.143352000 | 0.727566000  | -0.424304000 |
| C | -4.204207000 | 0.600121000  | -1.310354000 |
| C | -3.971444000 | 0.107600000  | -2.594375000 |

|   |              |              |              |
|---|--------------|--------------|--------------|
| C | -2.681702000 | -0.248636000 | -2.967174000 |
| C | -1.608833000 | -0.124480000 | -2.080928000 |
| O | 3.003301000  | -2.499060000 | 0.495091000  |
| C | 3.826229000  | -3.333845000 | -0.315786000 |
| H | 3.783902000  | 3.813170000  | -1.154520000 |
| H | 2.173095000  | 5.437064000  | -0.220882000 |
| H | -0.014019000 | 4.670626000  | 0.683813000  |
| H | 3.218504000  | 1.372789000  | -1.212037000 |
| H | 2.135642000  | -0.045062000 | 1.470173000  |
| H | -1.614649000 | 2.442134000  | 0.416085000  |
| H | -3.339792000 | 1.085830000  | 0.586572000  |
| H | -5.206642000 | 0.876299000  | -0.999205000 |
| H | -4.794556000 | -0.001223000 | -3.293452000 |
| H | -2.488009000 | -0.644103000 | -3.959022000 |
| H | -0.630271000 | -0.460736000 | -2.422263000 |
| H | 4.735492000  | -2.809225000 | -0.616172000 |
| H | 4.066102000  | -4.204130000 | 0.293175000  |
| H | 3.271940000  | -3.627253000 | -1.211259000 |
| N | -0.752282000 | 0.006607000  | 2.752251000  |
| N | -1.799696000 | -1.927476000 | 2.802627000  |
| N | -1.724275000 | -1.463314000 | 1.532287000  |
| C | -1.092411000 | -0.292799000 | 1.474639000  |
| C | 1.585793000  | -0.625747000 | 0.716455000  |
| C | 1.302484000  | 1.678027000  | -0.304597000 |
| C | 0.404696000  | 2.602289000  | 0.221433000  |
| N | -0.764389000 | 1.974322000  | 0.712252000  |
| C | 0.740223000  | 0.280218000  | -0.201870000 |
| H | 0.724403000  | -0.221355000 | -1.169568000 |



|   |              |              |              |
|---|--------------|--------------|--------------|
| C | -2.198231000 | -2.330144000 | 0.438959000  |
| H | -2.494897000 | -3.253996000 | 0.932311000  |
| H | -3.055375000 | -1.862598000 | -0.044958000 |
| H | -1.312974000 | -2.478902000 | -0.244300000 |
| C | 0.007016000  | 1.148590000  | 3.269830000  |
| H | 0.847132000  | 1.367000000  | 2.612482000  |
| H | -0.630659000 | 2.027801000  | 3.327600000  |
| H | 0.374140000  | 0.864525000  | 4.256619000  |
| C | -1.202224000 | -1.024469000 | 3.520343000  |
| H | -1.071907000 | -1.069519000 | 4.590771000  |
| O | 0.335618000  | -2.492677000 | -0.762471000 |
| H | 0.547400000  | -3.431373000 | -0.696158000 |
| H | 0.989377000  | -1.400811000 | 1.193779000  |
| O | 0.877757000  | -1.610024000 | -3.074921000 |
| H | 0.655689000  | -2.069455000 | -2.181043000 |
| H | 1.785327000  | -1.314882000 | -2.942962000 |

**A-TSa5**

|   |              |              |              |
|---|--------------|--------------|--------------|
| C | -3.158808000 | 2.957956000  | 0.484460000  |
| C | -3.083570000 | 3.128589000  | -0.895703000 |
| C | -2.164865000 | 2.397764000  | -1.654844000 |
| C | -2.313474000 | 2.057194000  | 1.137257000  |
| C | -2.128681000 | -1.511598000 | 0.481973000  |
| C | 0.477063000  | 0.157041000  | -0.450767000 |
| O | -1.911346000 | -2.269104000 | -0.446551000 |
| C | 1.752966000  | 1.021427000  | -0.405067000 |
| C | 2.818982000  | 0.749439000  | -1.268671000 |
| C | 3.936335000  | 1.579234000  | -1.310637000 |

|   |              |              |              |
|---|--------------|--------------|--------------|
| C | 3.994510000  | 2.703967000  | -0.493732000 |
| C | 2.930799000  | 2.990010000  | 0.357957000  |
| C | 1.816671000  | 2.156519000  | 0.407718000  |
| O | -3.347935000 | -1.013763000 | 0.725146000  |
| C | -4.343414000 | -1.330006000 | -0.242829000 |
| H | -3.875358000 | 3.535951000  | 1.059242000  |
| H | -3.740813000 | 3.836788000  | -1.390201000 |
| H | -2.106195000 | 2.521374000  | -2.732432000 |
| H | -2.360589000 | 1.928640000  | 2.214930000  |
| H | -0.369553000 | -1.731251000 | 1.685212000  |
| H | 0.192101000  | 1.118877000  | -2.275974000 |
| H | 2.787106000  | -0.126205000 | -1.916189000 |
| H | 4.759096000  | 1.344343000  | -1.978435000 |
| H | 4.863963000  | 3.352664000  | -0.519846000 |
| H | 2.966966000  | 3.868154000  | 0.994868000  |
| H | 0.998519000  | 2.380935000  | 1.082958000  |
| H | -4.074149000 | -0.899005000 | -1.211061000 |
| H | -4.448972000 | -2.411633000 | -0.349845000 |
| H | -5.267363000 | -0.885381000 | 0.122493000  |
| N | 0.567586000  | -2.091451000 | -1.732563000 |
| N | 1.883970000  | -3.233890000 | -0.379567000 |
| N | 1.687433000  | -1.978553000 | 0.082064000  |
| C | 0.881673000  | -1.271854000 | -0.707112000 |
| C | -1.091475000 | -0.955358000 | 1.414670000  |
| C | -1.390571000 | 1.327920000  | 0.396625000  |
| C | -1.335147000 | 1.509472000  | -0.988789000 |
| N | -0.366935000 | 0.646652000  | -1.569792000 |
| C | -0.400443000 | 0.304645000  | 0.842733000  |

|   |              |              |              |
|---|--------------|--------------|--------------|
| H | 0.303311000  | 0.633109000  | 1.955378000  |
| C | 2.389806000  | -1.549194000 | 1.291934000  |
| H | 3.432620000  | -1.361172000 | 1.029119000  |
| H | 1.919991000  | -0.650071000 | 1.694838000  |
| H | 2.289729000  | -2.336736000 | 2.036874000  |
| C | -0.331134000 | -1.881454000 | -2.871105000 |
| H | -1.301871000 | -1.566741000 | -2.501655000 |
| H | 0.086869000  | -1.134488000 | -3.543603000 |
| H | -0.409235000 | -2.840455000 | -3.384415000 |
| C | 1.185916000  | -3.279845000 | -1.473401000 |
| H | 1.093272000  | -4.144030000 | -2.112736000 |
| O | 0.946534000  | -1.816028000 | 3.791064000  |
| H | 0.342661000  | -1.947440000 | 4.527025000  |
| H | -1.570621000 | -0.645289000 | 2.347300000  |
| O | 0.799809000  | 0.696875000  | 3.094892000  |
| H | 0.928454000  | -0.827283000 | 3.618264000  |
| H | 1.600347000  | 1.232009000  | 3.114463000  |

**A-6a**

|   |              |              |              |
|---|--------------|--------------|--------------|
| C | 4.540887000  | 0.112958000  | -1.026467000 |
| C | 4.765711000  | 0.963312000  | 0.047650000  |
| C | 3.670527000  | 1.430452000  | 0.803837000  |
| C | 3.250119000  | -0.286486000 | -1.394602000 |
| C | -0.375526000 | -2.180802000 | -1.264860000 |
| C | 0.066703000  | 0.777666000  | 0.302911000  |
| O | 0.257322000  | -2.838388000 | -0.470212000 |
| C | -0.942142000 | 1.885624000  | -0.020015000 |
| C | -1.754558000 | 2.412538000  | 0.986951000  |

|   |              |              |              |
|---|--------------|--------------|--------------|
| C | -2.619699000 | 3.468701000  | 0.715691000  |
| C | -2.680986000 | 4.001161000  | -0.570646000 |
| C | -1.864316000 | 3.485091000  | -1.574379000 |
| C | -0.989755000 | 2.437047000  | -1.297753000 |
| O | -1.546003000 | -2.603387000 | -1.783619000 |
| C | -1.966936000 | -3.900772000 | -1.358028000 |
| H | 5.387332000  | -0.259860000 | -1.596900000 |
| H | 5.773963000  | 1.255690000  | 0.318774000  |
| H | 3.821043000  | 2.076945000  | 1.664914000  |
| H | 3.108512000  | -0.961474000 | -2.234034000 |
| H | -0.881769000 | -0.348537000 | -2.228170000 |
| H | 1.037807000  | 2.306406000  | 1.335774000  |
| H | -1.709280000 | 1.985089000  | 1.988351000  |
| H | -3.245001000 | 3.876016000  | 1.504237000  |
| H | -3.359165000 | 4.820350000  | -0.787526000 |
| H | -1.906319000 | 3.903931000  | -2.575043000 |
| H | -0.321342000 | 2.032601000  | -2.053526000 |
| H | -2.203168000 | -3.886573000 | -0.290881000 |
| H | -2.854884000 | -4.134316000 | -1.944021000 |
| H | -1.181079000 | -4.636156000 | -1.541008000 |
| N | -0.011058000 | -1.238991000 | 1.925541000  |
| N | -2.029314000 | -2.054206000 | 1.547616000  |
| N | -1.846131000 | -0.873745000 | 0.884053000  |
| C | -0.623878000 | -0.347303000 | 1.101444000  |
| C | 0.022328000  | -0.805490000 | -1.797346000 |
| C | 2.146166000  | 0.199715000  | -0.679669000 |
| C | 2.406820000  | 1.046773000  | 0.429572000  |
| N | 1.178455000  | 1.332613000  | 1.095178000  |

|   |              |              |              |
|---|--------------|--------------|--------------|
| C | 0.739861000  | 0.058931000  | -0.826882000 |
| C | -2.955393000 | -0.385867000 | 0.074403000  |
| H | -3.535168000 | 0.359288000  | 0.621909000  |
| H | -2.577393000 | 0.054857000  | -0.846556000 |
| H | -3.565251000 | -1.257682000 | -0.155698000 |
| C | 1.423820000  | -1.367439000 | 2.181298000  |
| H | 1.906205000  | -1.614338000 | 1.232006000  |
| H | 1.822838000  | -0.436937000 | 2.573761000  |
| H | 1.553323000  | -2.180075000 | 2.896379000  |
| C | -0.897868000 | -2.249056000 | 2.147531000  |
| H | -0.661183000 | -3.113574000 | 2.748611000  |
| H | 0.684453000  | -1.007666000 | -2.651261000 |

**A-TSa6**

|   |              |              |              |
|---|--------------|--------------|--------------|
| C | -4.336696000 | -1.225506000 | -0.996028000 |
| C | -4.317844000 | -2.183053000 | 0.014344000  |
| C | -3.122270000 | -2.458930000 | 0.699493000  |
| C | -3.182576000 | -0.529183000 | -1.366712000 |
| C | -0.326685000 | 2.117501000  | -1.262282000 |
| C | 0.173276000  | -0.920986000 | 0.182705000  |
| O | -1.211790000 | 2.489242000  | -0.527239000 |
| C | 1.531721000  | -1.544961000 | -0.077378000 |
| C | 2.398922000  | -1.819686000 | 0.982243000  |
| C | 3.610239000  | -2.467033000 | 0.756049000  |
| C | 3.970791000  | -2.833667000 | -0.538973000 |
| C | 3.105262000  | -2.570294000 | -1.598276000 |
| C | 1.883486000  | -1.943424000 | -1.366537000 |
| O | 0.640570000  | 2.938908000  | -1.714611000 |

|   |              |              |              |
|---|--------------|--------------|--------------|
| C | 0.517364000  | 4.304286000  | -1.311815000 |
| H | -5.271133000 | -1.007391000 | -1.504970000 |
| H | -5.226730000 | -2.708490000 | 0.286521000  |
| H | -3.093917000 | -3.185026000 | 1.507665000  |
| H | -3.225979000 | 0.229693000  | -2.142820000 |
| H | 0.868866000  | 0.583160000  | -2.138070000 |
| H | -0.307615000 | -2.704858000 | 1.175879000  |
| H | 2.117829000  | -1.507247000 | 1.986585000  |
| H | 4.273888000  | -2.682708000 | 1.587800000  |
| H | 4.919548000  | -3.328780000 | -0.719852000 |
| H | 3.378370000  | -2.861913000 | -2.607565000 |
| H | 1.178642000  | -1.764910000 | -2.173468000 |
| H | 0.641000000  | 4.386682000  | -0.230227000 |
| H | 1.310961000  | 4.840068000  | -1.830933000 |
| H | -0.460934000 | 4.697398000  | -1.596424000 |
| N | -0.414248000 | 1.115563000  | 1.958597000  |
| N | 1.135933000  | 2.624410000  | 1.534724000  |
| N | 1.453368000  | 1.406410000  | 0.994486000  |
| C | 0.533886000  | 0.449972000  | 1.240797000  |
| C | -0.172350000 | 0.705544000  | -1.812988000 |
| C | -1.972807000 | -0.818223000 | -0.723769000 |
| C | -1.985196000 | -1.781381000 | 0.317473000  |
| N | -0.699306000 | -1.818468000 | 0.890671000  |
| C | -0.629593000 | -0.363926000 | -0.887222000 |
| C | 2.713222000  | 1.301341000  | 0.273847000  |
| H | 3.427859000  | 0.696129000  | 0.833732000  |
| H | 2.550670000  | 0.848614000  | -0.704882000 |
| H | 3.081578000  | 2.318245000  | 0.153790000  |

|   |              |              |              |
|---|--------------|--------------|--------------|
| C | -1.761514000 | 0.657621000  | 2.285558000  |
| H | -2.383651000 | 0.742110000  | 1.391610000  |
| H | -1.729231000 | -0.377786000 | 2.614767000  |
| H | -2.149312000 | 1.298256000  | 3.078650000  |
| C | -0.011984000 | 2.410878000  | 2.096166000  |
| H | -0.595137000 | 3.161103000  | 2.608327000  |
| H | -0.777985000 | 0.685713000  | -2.730822000 |

### **3) Cartesian coordinates of the optimized species in pathway A- b**

#### ***Si-A-TSb1***

|   |              |              |              |
|---|--------------|--------------|--------------|
| C | 1.901138000  | -3.628202000 | 0.022878000  |
| C | 0.637769000  | -4.125895000 | 0.324295000  |
| C | -0.485705000 | -3.330459000 | 0.119957000  |
| C | -0.346008000 | -2.029523000 | -0.370359000 |
| C | 0.936013000  | -1.507045000 | -0.645821000 |
| C | 2.044230000  | -2.331207000 | -0.465511000 |
| C | 1.025265000  | -0.106175000 | -1.150954000 |
| N | -1.468888000 | -1.234620000 | -0.658607000 |
| C | 2.164015000  | 0.594894000  | -1.531467000 |
| C | 3.400981000  | 0.620184000  | -0.801237000 |
| C | -2.393114000 | -1.108531000 | 0.205395000  |
| O | 3.657358000  | 0.070726000  | 0.266082000  |
| C | -3.605932000 | -0.318006000 | -0.064563000 |
| C | -3.802246000 | 0.286186000  | -1.312619000 |
| C | -4.942978000 | 1.039741000  | -1.548112000 |
| C | -5.900215000 | 1.196051000  | -0.543709000 |

|   |              |              |              |
|---|--------------|--------------|--------------|
| C | -5.712240000 | 0.595115000  | 0.697395000  |
| C | -4.567457000 | -0.159682000 | 0.935635000  |
| O | 4.330064000  | 1.404219000  | -1.414731000 |
| C | 5.562270000  | 1.517235000  | -0.721390000 |
| H | 2.779598000  | -4.250073000 | 0.160761000  |
| H | 0.520724000  | -5.138336000 | 0.697667000  |
| H | -1.483369000 | -3.723156000 | 0.293369000  |
| H | 3.029532000  | -1.938497000 | -0.681428000 |
| H | 2.063141000  | 1.351967000  | -2.300268000 |
| H | 0.140911000  | 0.131277000  | -1.742311000 |
| H | -2.318953000 | -1.568470000 | 1.202921000  |
| H | -3.048521000 | 0.143598000  | -2.080491000 |
| H | -5.093713000 | 1.504859000  | -2.517106000 |
| H | -6.792611000 | 1.784272000  | -0.732494000 |
| H | -6.455719000 | 0.714968000  | 1.478539000  |
| H | -4.414481000 | -0.629158000 | 1.904201000  |
| H | 6.196077000  | 2.155441000  | -1.336619000 |
| H | 5.416686000  | 1.965280000  | 0.265246000  |
| H | 6.026405000  | 0.536967000  | -0.586488000 |
| N | 1.038036000  | 0.732927000  | 1.735881000  |
| N | 0.695761000  | 2.898469000  | 1.508748000  |
| N | 0.178518000  | 2.176880000  | 0.471776000  |
| C | 0.387519000  | 0.854972000  | 0.546684000  |
| C | 1.212760000  | 1.981665000  | 2.269567000  |
| H | 1.706613000  | 2.169044000  | 3.211147000  |
| C | -0.399400000 | 2.864506000  | -0.661992000 |
| H | -1.206073000 | 2.251249000  | -1.065400000 |
| H | -0.789897000 | 3.821493000  | -0.319369000 |



|   |             |              |              |
|---|-------------|--------------|--------------|
| H | 0.365742000 | 3.025780000  | -1.427628000 |
| C | 1.483379000 | -0.517046000 | 2.343197000  |
| H | 1.585845000 | -0.358956000 | 3.418300000  |
| H | 0.733038000 | -1.287217000 | 2.157740000  |
| H | 2.435406000 | -0.810160000 | 1.900710000  |

**Re-A-TSb1**

|   |              |              |              |
|---|--------------|--------------|--------------|
| C | 2.227397000  | 3.559823000  | -0.035271000 |
| C | 1.155657000  | 4.120093000  | 0.655466000  |
| C | -0.026817000 | 3.405449000  | 0.792433000  |
| C | -0.148041000 | 2.130507000  | 0.234515000  |
| C | 0.939765000  | 1.536584000  | -0.437563000 |
| C | 2.112263000  | 2.285679000  | -0.575873000 |
| C | 0.805527000  | 0.188282000  | -1.066618000 |
| N | -1.348746000 | 1.418523000  | 0.439010000  |
| C | 1.821856000  | -0.570258000 | -1.617461000 |
| C | 3.130724000  | -0.713824000 | -1.026521000 |
| C | -2.176083000 | 1.337940000  | -0.520811000 |
| O | 3.534156000  | -0.226229000 | 0.019991000  |
| C | -3.402826000 | 0.525883000  | -0.428676000 |
| C | -3.615070000 | -0.328713000 | 0.659990000  |
| C | -4.761708000 | -1.111110000 | 0.711413000  |
| C | -5.703036000 | -1.045599000 | -0.317333000 |
| C | -5.493653000 | -0.199634000 | -1.402523000 |
| C | -4.342279000 | 0.579676000  | -1.459868000 |
| O | 3.922995000  | -1.540740000 | -1.762753000 |
| C | 5.207631000  | -1.776546000 | -1.206123000 |
| H | 3.152566000  | 4.113425000  | -0.154790000 |

|   |              |              |              |
|---|--------------|--------------|--------------|
| H | 1.237529000  | 5.114183000  | 1.083600000  |
| H | -0.876169000 | 3.819883000  | 1.325964000  |
| H | 2.946009000  | 1.848177000  | -1.109934000 |
| H | 1.580144000  | -1.279360000 | -2.400804000 |
| H | -0.160519000 | 0.051911000  | -1.552002000 |
| H | -1.998384000 | 1.844324000  | -1.481845000 |
| H | -2.863954000 | -0.363745000 | 1.443928000  |
| H | -4.926647000 | -1.775255000 | 1.553961000  |
| H | -6.598334000 | -1.657592000 | -0.272747000 |
| H | -6.224027000 | -0.148700000 | -2.203391000 |
| H | -4.168456000 | 1.238758000  | -2.306800000 |
| H | 5.714195000  | -2.453164000 | -1.894079000 |
| H | 5.767661000  | -0.842870000 | -1.109319000 |
| H | 5.125543000  | -2.229914000 | -0.214927000 |
| N | -0.074044000 | -2.217671000 | 0.485862000  |
| N | 1.145645000  | -2.179305000 | 2.312689000  |
| N | 0.964557000  | -0.931183000 | 1.782321000  |
| C | 0.235901000  | -0.902029000 | 0.660304000  |
| C | 0.502088000  | -2.948727000 | 1.489800000  |
| H | 0.411807000  | -4.020285000 | 1.588338000  |
| C | 1.566063000  | 0.215884000  | 2.449930000  |
| H | 0.809272000  | 0.990981000  | 2.576861000  |
| H | 1.921479000  | -0.130856000 | 3.418860000  |
| H | 2.394301000  | 0.585163000  | 1.844113000  |
| C | -0.818153000 | -2.727784000 | -0.648900000 |
| H | -0.203461000 | -2.660909000 | -1.550777000 |
| H | -1.083394000 | -3.769842000 | -0.466167000 |
| H | -1.729484000 | -2.140559000 | -0.776984000 |

**Si-A-1b**

|   |              |              |              |
|---|--------------|--------------|--------------|
| C | -2.257213000 | 3.573581000  | -0.148543000 |
| C | -1.007068000 | 4.183856000  | -0.088668000 |
| C | 0.144825000  | 3.429535000  | -0.284041000 |
| C | 0.044334000  | 2.058812000  | -0.543239000 |
| C | -1.218717000 | 1.449473000  | -0.647906000 |
| C | -2.358794000 | 2.213278000  | -0.433375000 |
| C | -1.314184000 | -0.029680000 | -1.029980000 |
| N | 1.170687000  | 1.221700000  | -0.703047000 |
| C | -2.661356000 | -0.652311000 | -1.218964000 |
| C | -3.434860000 | -0.894979000 | -0.090057000 |
| C | 2.191398000  | 1.403059000  | 0.038256000  |
| O | -3.111021000 | -0.676883000 | 1.098506000  |
| C | 3.370042000  | 0.525693000  | -0.019310000 |
| C | 3.377053000  | -0.620708000 | -0.823307000 |
| C | 4.484657000  | -1.455979000 | -0.832072000 |
| C | 5.596891000  | -1.153911000 | -0.044077000 |
| C | 5.596153000  | -0.015640000 | 0.757125000  |
| C | 4.483060000  | 0.818757000  | 0.772288000  |
| O | -4.673509000 | -1.436844000 | -0.362206000 |
| C | -5.474545000 | -1.666220000 | 0.778355000  |
| H | -3.156061000 | 4.159827000  | 0.012978000  |
| H | -0.926426000 | 5.249172000  | 0.102939000  |
| H | 1.122661000  | 3.902481000  | -0.271665000 |
| H | -3.321006000 | 1.716470000  | -0.509469000 |
| H | -3.044564000 | -0.818283000 | -2.214911000 |
| H | -0.760252000 | -0.110419000 | -1.976415000 |

|   |              |              |              |
|---|--------------|--------------|--------------|
| H | 2.223780000  | 2.206695000  | 0.790371000  |
| H | 2.500821000  | -0.835847000 | -1.427301000 |
| H | 4.485571000  | -2.347266000 | -1.450942000 |
| H | 6.462245000  | -1.808701000 | -0.054048000 |
| H | 6.459656000  | 0.220757000  | 1.370059000  |
| H | 4.474228000  | 1.706561000  | 1.399611000  |
| H | -6.410808000 | -2.089872000 | 0.410449000  |
| H | -4.995768000 | -2.363612000 | 1.472446000  |
| H | -5.673924000 | -0.737833000 | 1.322489000  |
| N | -0.203094000 | -0.767882000 | 1.205299000  |
| N | 0.661138000  | -2.692197000 | 0.546092000  |
| N | 0.017061000  | -2.065682000 | -0.467928000 |
| C | -0.521255000 | -0.901116000 | -0.098634000 |
| C | 0.514751000  | -1.879584000 | 1.548560000  |
| H | 0.896504000  | -2.051129000 | 2.542954000  |
| C | -0.134527000 | -2.695411000 | -1.765511000 |
| H | 0.439048000  | -2.150392000 | -2.519479000 |
| H | 0.238757000  | -3.712898000 | -1.672378000 |
| H | -1.199154000 | -2.676251000 | -2.018983000 |
| C | -0.588847000 | 0.302701000  | 2.122876000  |
| H | -0.420532000 | -0.065936000 | 3.135090000  |
| H | 0.020625000  | 1.190387000  | 1.941697000  |
| H | -1.650490000 | 0.495096000  | 1.962540000  |

**Re- A-1b**

|   |             |             |              |
|---|-------------|-------------|--------------|
| C | 2.678816000 | 3.347539000 | -0.256483000 |
| C | 1.640685000 | 4.120295000 | 0.255736000  |
| C | 0.377052000 | 3.563698000 | 0.437713000  |

|   |              |              |              |
|---|--------------|--------------|--------------|
| C | 0.159178000  | 2.232302000  | 0.091700000  |
| C | 1.199260000  | 1.444445000  | -0.430295000 |
| C | 2.454788000  | 2.015348000  | -0.597352000 |
| C | 0.914976000  | -0.003512000 | -0.838144000 |
| N | -1.079732000 | 1.596201000  | 0.360352000  |
| C | 1.993974000  | -0.840095000 | -1.447631000 |
| C | 3.063594000  | -1.235358000 | -0.648281000 |
| C | -1.949620000 | 1.517636000  | -0.561541000 |
| O | 3.229547000  | -0.976904000 | 0.560536000  |
| C | -3.160019000 | 0.687344000  | -0.406627000 |
| C | -3.361983000 | -0.061186000 | 0.759802000  |
| C | -4.462892000 | -0.900093000 | 0.862129000  |
| C | -5.368902000 | -1.001037000 | -0.196186000 |
| C | -5.172034000 | -0.259372000 | -1.357109000 |
| C | -4.067975000 | 0.582767000  | -1.462234000 |
| O | 4.004538000  | -1.994733000 | -1.313789000 |
| C | 5.107650000  | -2.381488000 | -0.520168000 |
| H | 3.665164000  | 3.780314000  | -0.386842000 |
| H | 1.811873000  | 5.158802000  | 0.521193000  |
| H | -0.440992000 | 4.144916000  | 0.851479000  |
| H | 3.243049000  | 1.386846000  | -0.999722000 |
| H | 1.967567000  | -1.064206000 | -2.504037000 |
| H | 0.097376000  | 0.049727000  | -1.571350000 |
| H | -1.810103000 | 2.009167000  | -1.536090000 |
| H | -2.639256000 | 0.027882000  | 1.566335000  |
| H | -4.621649000 | -1.475841000 | 1.768730000  |
| H | -6.228354000 | -1.658718000 | -0.113422000 |
| H | -5.875660000 | -0.337135000 | -2.179326000 |

|   |              |              |              |
|---|--------------|--------------|--------------|
| H | -3.904273000 | 1.160416000  | -2.368692000 |
| H | 5.754830000  | -2.974596000 | -1.168843000 |
| H | 5.654286000  | -1.511809000 | -0.142303000 |
| H | 4.793739000  | -2.977371000 | 0.341986000  |
| N | -0.553577000 | -1.817010000 | 0.097577000  |
| N | -0.225792000 | -1.689425000 | 2.265839000  |
| N | 0.491089000  | -0.738388000 | 1.610279000  |
| C | 0.313698000  | -0.795158000 | 0.292522000  |
| C | -0.844173000 | -2.334371000 | 1.324176000  |
| H | -1.507864000 | -3.171665000 | 1.476069000  |
| C | 1.285408000  | 0.208291000  | 2.386108000  |
| H | 0.733360000  | 1.145450000  | 2.481862000  |
| H | 1.430732000  | -0.252033000 | 3.361536000  |
| H | 2.238059000  | 0.335180000  | 1.873206000  |
| C | -1.015584000 | -2.284139000 | -1.197832000 |
| H | -0.137602000 | -2.400121000 | -1.840116000 |
| H | -1.517434000 | -3.241250000 | -1.059072000 |
| H | -1.718822000 | -1.563650000 | -1.624923000 |

**A-11b**

|   |              |              |              |
|---|--------------|--------------|--------------|
| C | -2.351728000 | -0.530114000 | 2.961634000  |
| C | -1.441911000 | 0.352617000  | 3.534049000  |
| C | -0.258272000 | 0.656113000  | 2.870478000  |
| C | 0.025776000  | 0.080852000  | 1.627356000  |
| C | -0.924880000 | -0.761668000 | 1.014117000  |
| C | -2.095145000 | -1.074033000 | 1.704182000  |
| C | -0.687719000 | -1.186306000 | -0.424610000 |
| N | 1.230351000  | 0.291360000  | 0.923712000  |

|   |              |              |              |
|---|--------------|--------------|--------------|
| C | -1.838447000 | -1.966820000 | -1.073923000 |
| C | -2.036232000 | -3.354492000 | -0.505311000 |
| C | 2.311045000  | 0.507168000  | 1.573260000  |
| O | -1.142984000 | -4.036296000 | -0.054130000 |
| C | 3.611924000  | 0.674087000  | 0.918784000  |
| C | 3.775010000  | 0.420214000  | -0.449119000 |
| C | 5.022698000  | 0.554531000  | -1.039633000 |
| C | 6.118996000  | 0.949573000  | -0.270243000 |
| C | 5.966467000  | 1.199342000  | 1.091054000  |
| C | 4.717522000  | 1.054407000  | 1.686113000  |
| O | -3.303781000 | -3.742725000 | -0.582736000 |
| C | -3.570968000 | -5.079125000 | -0.128080000 |
| H | -3.272158000 | -0.778844000 | 3.478539000  |
| H | -1.653232000 | 0.809721000  | 4.494829000  |
| H | 0.439190000  | 1.364976000  | 3.305724000  |
| H | -2.836987000 | -1.732197000 | 1.260166000  |
| H | -2.767886000 | -1.399218000 | -0.991642000 |
| H | -0.613924000 | -0.225712000 | -0.973616000 |
| H | 2.324818000  | 0.546105000  | 2.672229000  |
| H | 2.913420000  | 0.106074000  | -1.029417000 |
| H | 5.147687000  | 0.348775000  | -2.097514000 |
| H | 7.094277000  | 1.057320000  | -0.733295000 |
| H | 6.819819000  | 1.501641000  | 1.688210000  |
| H | 4.594666000  | 1.242139000  | 2.749703000  |
| H | -4.636427000 | -5.232957000 | -0.280250000 |
| H | -2.987258000 | -5.794462000 | -0.709205000 |
| H | -3.310128000 | -5.173179000 | 0.927267000  |
| N | 1.412159000  | -2.604272000 | 0.119070000  |

|   |              |              |              |
|---|--------------|--------------|--------------|
| N | 2.452143000  | -2.449415000 | -1.820130000 |
| N | 1.281216000  | -1.769853000 | -1.838745000 |
| C | 0.631725000  | -1.849658000 | -0.678228000 |
| C | 2.512668000  | -2.939326000 | -0.618373000 |
| H | 3.323123000  | -3.541230000 | -0.235610000 |
| C | 0.888426000  | -1.052728000 | -3.050921000 |
| H | 0.247933000  | -0.205031000 | -2.785919000 |
| H | 1.806369000  | -0.695796000 | -3.516419000 |
| H | 0.381125000  | -1.738232000 | -3.732521000 |
| C | 1.187780000  | -2.983495000 | 1.514293000  |
| H | 1.818818000  | -3.846084000 | 1.725491000  |
| H | 1.456770000  | -2.150367000 | 2.166346000  |
| H | 0.144439000  | -3.258697000 | 1.641748000  |
| N | -1.745102000 | 3.608686000  | -1.058331000 |
| C | -3.030917000 | 4.177105000  | -0.668156000 |
| C | -3.490789000 | 3.688408000  | 0.710425000  |
| C | -3.313477000 | 2.174887000  | 0.860801000  |
| C | -3.803528000 | 1.379808000  | -0.353636000 |
| C | -2.964061000 | 1.566624000  | -1.649699000 |
| C | -1.655131000 | 2.306524000  | -1.468573000 |
| C | 0.683550000  | 2.420921000  | -1.554286000 |
| C | 0.597777000  | 3.382709000  | -0.375116000 |
| C | -0.554827000 | 4.342661000  | -0.620311000 |
| H | -2.930575000 | 5.265911000  | -0.686296000 |
| H | -3.778773000 | 3.928177000  | -1.425369000 |
| H | -2.931197000 | 4.202439000  | 1.500007000  |
| H | -4.543680000 | 3.963945000  | 0.839772000  |
| H | -2.254576000 | 1.939532000  | 1.035127000  |



|   |              |              |              |
|---|--------------|--------------|--------------|
| H | -3.847427000 | 1.833054000  | 1.752985000  |
| H | -4.849027000 | 1.635516000  | -0.558400000 |
| H | -3.800954000 | 0.319398000  | -0.079703000 |
| H | -3.550552000 | 2.089651000  | -2.411840000 |
| H | -2.699885000 | 0.601615000  | -2.087936000 |
| H | 1.494908000  | 1.704289000  | -1.399526000 |
| H | 0.911866000  | 2.982017000  | -2.472161000 |
| H | 1.530221000  | 3.936660000  | -0.239926000 |
| H | 0.408768000  | 2.802777000  | 0.536284000  |
| H | -0.284633000 | 5.088119000  | -1.378982000 |
| H | -0.806538000 | 4.884708000  | 0.298104000  |
| N | -0.556807000 | 1.676207000  | -1.730491000 |
| H | -1.645985000 | -2.084103000 | -2.147646000 |

**A-TSb2**

|   |              |              |              |
|---|--------------|--------------|--------------|
| C | -2.281793000 | 1.732584000  | 2.756865000  |
| C | -1.042815000 | 1.703612000  | 3.391861000  |
| C | 0.003834000  | 1.000283000  | 2.809611000  |
| C | -0.173433000 | 0.313869000  | 1.601734000  |
| C | -1.416677000 | 0.370210000  | 0.924688000  |
| C | -2.456688000 | 1.087345000  | 1.535941000  |
| C | -1.549163000 | -0.228156000 | -0.438283000 |
| N | 0.845643000  | -0.461648000 | 1.002214000  |
| C | -2.858844000 | 0.079546000  | -1.158577000 |
| C | -4.057493000 | -0.633056000 | -0.554273000 |
| C | 1.720367000  | -1.038999000 | 1.733911000  |
| O | -3.996671000 | -1.694169000 | 0.025053000  |
| C | 2.772374000  | -1.895964000 | 1.167942000  |

|   |              |              |              |
|---|--------------|--------------|--------------|
| C | 2.604217000  | -2.509056000 | -0.079991000 |
| C | 3.601751000  | -3.320944000 | -0.601596000 |
| C | 4.778653000  | -3.528109000 | 0.118771000  |
| C | 4.945776000  | -2.936888000 | 1.368853000  |
| C | 3.940757000  | -2.133226000 | 1.897598000  |
| O | -5.190515000 | 0.038243000  | -0.754588000 |
| C | -6.378246000 | -0.596491000 | -0.259597000 |
| H | -3.111440000 | 2.271341000  | 3.202643000  |
| H | -0.889894000 | 2.228930000  | 4.328345000  |
| H | 0.981614000  | 1.003926000  | 3.282149000  |
| H | -3.429589000 | 1.149655000  | 1.057597000  |
| H | -3.061079000 | 1.154113000  | -1.180208000 |
| H | -0.500172000 | 0.512931000  | -1.102671000 |
| H | 1.721331000  | -0.939465000 | 2.829063000  |
| H | 1.669390000  | -2.366492000 | -0.612967000 |
| H | 3.458942000  | -3.805232000 | -1.562120000 |
| H | 5.557921000  | -4.164065000 | -0.287945000 |
| H | 5.855363000  | -3.109299000 | 1.934096000  |
| H | 4.065194000  | -1.678168000 | 2.876799000  |
| H | -7.197752000 | 0.072023000  | -0.512792000 |
| H | -6.510123000 | -1.569712000 | -0.734852000 |
| H | -6.307231000 | -0.732661000 | 0.820929000  |
| N | -1.117849000 | -2.621896000 | 0.367290000  |
| N | -0.566109000 | -3.566779000 | -1.549711000 |
| N | -0.840547000 | -2.246021000 | -1.713451000 |
| C | -1.188030000 | -1.635635000 | -0.565493000 |
| C | -0.732552000 | -3.763302000 | -0.278961000 |
| H | -0.589184000 | -4.709244000 | 0.221639000  |

|   |              |              |              |
|---|--------------|--------------|--------------|
| C | -0.789543000 | -1.687295000 | -3.054454000 |
| H | -0.703005000 | -0.603124000 | -2.985733000 |
| H | 0.083417000  | -2.103616000 | -3.556750000 |
| H | -1.691660000 | -1.961035000 | -3.605811000 |
| C | -1.554238000 | -2.563986000 | 1.760629000  |
| H | -1.706136000 | -3.589129000 | 2.097542000  |
| H | -0.799662000 | -2.077905000 | 2.379972000  |
| H | -2.498273000 | -2.024127000 | 1.805002000  |
| N | 1.823442000  | 3.078820000  | -1.553033000 |
| C | 1.950476000  | 4.502726000  | -1.237590000 |
| C | 2.095065000  | 4.741516000  | 0.269428000  |
| C | 1.105613000  | 3.885431000  | 1.063896000  |
| C | -0.322922000 | 3.917251000  | 0.510688000  |
| C | -0.524119000 | 3.244181000  | -0.876557000 |
| C | 0.654600000  | 2.437338000  | -1.361981000 |
| C | 1.628062000  | 0.362340000  | -2.022959000 |
| C | 2.915098000  | 0.882520000  | -1.401140000 |
| C | 3.076379000  | 2.346192000  | -1.777650000 |
| H | 2.813520000  | 4.883300000  | -1.789924000 |
| H | 1.076343000  | 5.029828000  | -1.625946000 |
| H | 3.118446000  | 4.520689000  | 0.592079000  |
| H | 1.925282000  | 5.805962000  | 0.463943000  |
| H | 1.453432000  | 2.844410000  | 1.086100000  |
| H | 1.087701000  | 4.217422000  | 2.106253000  |
| H | -0.667432000 | 4.955541000  | 0.455196000  |
| H | -0.972387000 | 3.408137000  | 1.225865000  |
| H | -0.754209000 | 3.989189000  | -1.645203000 |
| H | -1.379636000 | 2.567748000  | -0.840071000 |

|   |              |              |              |
|---|--------------|--------------|--------------|
| H | 1.441035000  | -0.665192000 | -1.707550000 |
| H | 1.699984000  | 0.381398000  | -3.119323000 |
| H | 3.778432000  | 0.307979000  | -1.744361000 |
| H | 2.842464000  | 0.771671000  | -0.314044000 |
| H | 3.370995000  | 2.453059000  | -2.828487000 |
| H | 3.850306000  | 2.819846000  | -1.165167000 |
| N | 0.489275000  | 1.162492000  | -1.590097000 |
| H | -2.820533000 | -0.233015000 | -2.209358000 |

**A-2b**

|   |              |              |              |
|---|--------------|--------------|--------------|
| C | -2.260476000 | 3.694101000  | -0.190228000 |
| C | -0.994948000 | 4.282332000  | -0.239869000 |
| C | 0.124096000  | 3.471824000  | -0.356577000 |
| C | -0.001098000 | 2.077799000  | -0.435604000 |
| C | -1.279921000 | 1.463818000  | -0.382997000 |
| C | -2.394909000 | 2.316071000  | -0.256680000 |
| C | -1.437477000 | 0.015710000  | -0.515894000 |
| N | 1.112890000  | 1.244629000  | -0.626092000 |
| C | -2.608157000 | -0.505371000 | -1.332618000 |
| C | -3.539222000 | -1.284864000 | -0.437886000 |
| C | 2.196964000  | 1.464032000  | 0.004233000  |
| O | -3.482213000 | -2.478145000 | -0.247297000 |
| C | 3.352132000  | 0.559350000  | -0.106919000 |
| C | 3.225356000  | -0.678582000 | -0.749742000 |
| C | 4.303829000  | -1.550747000 | -0.796892000 |
| C | 5.519997000  | -1.195025000 | -0.211985000 |
| C | 5.651807000  | 0.033963000  | 0.429222000  |
| C | 4.568182000  | 0.904475000  | 0.487678000  |

|   |              |              |              |
|---|--------------|--------------|--------------|
| O | -4.417326000 | -0.486658000 | 0.198472000  |
| C | -5.249067000 | -1.149764000 | 1.148476000  |
| H | -3.145514000 | 4.315913000  | -0.095785000 |
| H | -0.885084000 | 5.361069000  | -0.203506000 |
| H | 1.112778000  | 3.912348000  | -0.450569000 |
| H | -3.382111000 | 1.867692000  | -0.183421000 |
| H | -3.139675000 | 0.343452000  | -1.765908000 |
| H | -2.318559000 | -1.165376000 | -2.154177000 |
| H | 2.306508000  | 2.308876000  | 0.703867000  |
| H | 2.267100000  | -0.936196000 | -1.192058000 |
| H | 4.196357000  | -2.514938000 | -1.283342000 |
| H | 6.361709000  | -1.879222000 | -0.250821000 |
| H | 6.595845000  | 0.311304000  | 0.887149000  |
| H | 4.662544000  | 1.861704000  | 0.994805000  |
| H | -5.915592000 | -0.387287000 | 1.547950000  |
| H | -5.818960000 | -1.946884000 | 0.666934000  |
| H | -4.642457000 | -1.586643000 | 1.945197000  |
| N | 0.162626000  | -0.665538000 | 1.259469000  |
| N | 0.684001000  | -2.714142000 | 0.601395000  |
| N | -0.212517000 | -2.146310000 | -0.267046000 |
| C | -0.553957000 | -0.866109000 | 0.085279000  |
| C | 0.886798000  | -1.806439000 | 1.493910000  |
| H | 1.554938000  | -1.913716000 | 2.335492000  |
| C | -0.507734000 | -2.820733000 | -1.509588000 |
| H | 0.127292000  | -3.704449000 | -1.543058000 |
| H | -1.559904000 | -3.116039000 | -1.546491000 |
| H | -0.266946000 | -2.162240000 | -2.350460000 |
| C | -0.102591000 | 0.376372000  | 2.227681000  |

|   |              |             |             |
|---|--------------|-------------|-------------|
| H | 0.256843000  | 0.040190000 | 3.201323000 |
| H | 0.384813000  | 1.318866000 | 1.964233000 |
| H | -1.182236000 | 0.546235000 | 2.271148000 |

**A-TSb3**

|   |              |              |              |
|---|--------------|--------------|--------------|
| C | 3.966582000  | -0.002333000 | -1.053162000 |
| C | 3.827687000  | 0.904919000  | -2.106028000 |
| C | 2.590179000  | 1.429148000  | -2.461183000 |
| C | 1.435035000  | 1.033354000  | -1.765183000 |
| C | 1.578277000  | 0.066054000  | -0.719883000 |
| C | 2.831082000  | -0.402511000 | -0.343946000 |
| C | 0.279918000  | -0.162513000 | -0.001791000 |
| N | 0.179380000  | 1.548115000  | -1.908564000 |
| C | 0.145014000  | 0.831257000  | 1.139959000  |
| C | 1.175026000  | 0.543378000  | 2.208544000  |
| C | -0.719231000 | 0.631887000  | -1.513281000 |
| O | 1.267279000  | -0.512688000 | 2.798982000  |
| C | -2.051053000 | 1.055360000  | -1.007664000 |
| C | -2.278707000 | 2.382847000  | -0.637004000 |
| C | -3.497429000 | 2.751101000  | -0.076826000 |
| C | -4.494872000 | 1.797740000  | 0.125159000  |
| C | -4.276985000 | 0.473173000  | -0.250655000 |
| C | -3.060564000 | 0.106512000  | -0.818826000 |
| O | 1.999781000  | 1.570772000  | 2.418310000  |
| C | 3.050639000  | 1.322361000  | 3.352172000  |
| H | 4.944587000  | -0.386432000 | -0.784052000 |
| H | 4.709523000  | 1.213536000  | -2.661051000 |
| H | 2.494868000  | 2.142829000  | -3.272387000 |

|   |              |              |              |
|---|--------------|--------------|--------------|
| H | 2.917454000  | -1.090751000 | 0.496197000  |
| H | 0.318548000  | 1.823187000  | 0.710691000  |
| H | -0.851104000 | 0.839737000  | 1.588843000  |
| H | -0.777394000 | -0.330346000 | -2.056312000 |
| H | -1.482694000 | 3.101160000  | -0.809348000 |
| H | -3.673058000 | 3.784840000  | 0.204678000  |
| H | -5.443523000 | 2.088157000  | 0.565820000  |
| H | -5.055143000 | -0.270108000 | -0.106896000 |
| H | -2.886134000 | -0.926254000 | -1.119212000 |
| H | 3.616518000  | 2.249557000  | 3.416071000  |
| H | 2.639971000  | 1.048467000  | 4.326178000  |
| H | 3.684555000  | 0.508675000  | 2.992603000  |
| N | -0.073986000 | -2.478729000 | -0.828428000 |
| N | -1.602997000 | -3.227300000 | 0.579016000  |
| N | -1.191299000 | -1.977848000 | 0.940336000  |
| C | -0.249420000 | -1.473662000 | 0.099814000  |
| C | -0.913220000 | -3.501095000 | -0.477164000 |
| H | -0.975019000 | -4.425509000 | -1.031248000 |
| C | -1.765396000 | -1.407631000 | 2.150437000  |
| H | -2.311150000 | -2.218703000 | 2.629136000  |
| H | -0.961171000 | -1.063077000 | 2.801508000  |
| H | -2.457576000 | -0.599383000 | 1.901582000  |
| C | 0.898272000  | -2.575345000 | -1.916984000 |
| H | 0.681330000  | -3.498941000 | -2.455649000 |
| H | 0.815672000  | -1.727822000 | -2.594847000 |
| H | 1.911769000  | -2.601179000 | -1.516192000 |

**A-3b**

|   |              |              |              |
|---|--------------|--------------|--------------|
| C | 3.572251000  | -1.969720000 | 0.302064000  |
| C | 3.110710000  | -3.179411000 | -0.244473000 |
| C | 1.877349000  | -3.296000000 | -0.862423000 |
| C | 1.022499000  | -2.164468000 | -0.952691000 |
| C | 1.528744000  | -0.935113000 | -0.421195000 |
| C | 2.757767000  | -0.837469000 | 0.209621000  |
| C | 0.395927000  | 0.068850000  | -0.488627000 |
| N | -0.247859000 | -2.143718000 | -1.370444000 |
| C | 0.822358000  | 1.385380000  | -1.149594000 |
| C | 1.832428000  | 2.164006000  | -0.338882000 |
| C | -0.605813000 | -0.761889000 | -1.472736000 |
| O | 1.760823000  | 2.355041000  | 0.856687000  |
| C | -2.062134000 | -0.450952000 | -1.207875000 |
| C | -2.792939000 | -1.210263000 | -0.290613000 |
| C | -4.097533000 | -0.857905000 | 0.039718000  |
| C | -4.700185000 | 0.247719000  | -0.559245000 |
| C | -3.996860000 | 0.984828000  | -1.507628000 |
| C | -2.686394000 | 0.633368000  | -1.829001000 |
| O | 2.822525000  | 2.640278000  | -1.094898000 |
| C | 3.821471000  | 3.382061000  | -0.390462000 |
| H | 4.545935000  | -1.912601000 | 0.774853000  |
| H | 3.746311000  | -4.059611000 | -0.178987000 |
| H | 1.535835000  | -4.245629000 | -1.261083000 |
| H | 3.076650000  | 0.096467000  | 0.669908000  |
| H | 1.277117000  | 1.123016000  | -2.105362000 |
| H | -0.026913000 | 2.042639000  | -1.369879000 |
| H | -0.361363000 | -0.348497000 | -2.473169000 |
| H | -2.319440000 | -2.094834000 | 0.126384000  |



|   |              |              |              |
|---|--------------|--------------|--------------|
| H | -4.655246000 | -1.454558000 | 0.755465000  |
| H | -5.720309000 | 0.517715000  | -0.305250000 |
| H | -4.470608000 | 1.826452000  | -2.004092000 |
| H | -2.141607000 | 1.197272000  | -2.584880000 |
| H | 3.371134000  | 4.233489000  | 0.123405000  |
| H | 4.312971000  | 2.742868000  | 0.346014000  |
| H | 4.530672000  | 3.715001000  | -1.145275000 |
| N | -0.330365000 | -0.741060000 | 1.823465000  |
| N | -1.569111000 | 0.935695000  | 2.538883000  |
| N | -1.031147000 | 1.213200000  | 1.329164000  |
| C | -0.261434000 | 0.217840000  | 0.863474000  |
| C | -1.134863000 | -0.254338000 | 2.810265000  |
| H | -1.369173000 | -0.807537000 | 3.706237000  |
| C | -1.348772000 | 2.519858000  | 0.761280000  |
| H | -2.052150000 | 2.972735000  | 1.456282000  |
| H | -0.439760000 | 3.116296000  | 0.702453000  |
| H | -1.825991000 | 2.393911000  | -0.209390000 |
| C | 0.210846000  | -2.112634000 | 1.882123000  |
| H | -0.153645000 | -2.538224000 | 2.817555000  |
| H | -0.171139000 | -2.674075000 | 1.029694000  |
| H | 1.300774000  | -2.096142000 | 1.868725000  |

**A-4b**

|   |              |             |             |
|---|--------------|-------------|-------------|
| C | -3.470404000 | 1.087032000 | 1.718267000 |
| C | -3.194607000 | 2.453453000 | 1.590175000 |
| C | -2.069496000 | 2.923501000 | 0.924448000 |
| C | -1.154840000 | 2.002557000 | 0.362094000 |
| C | -1.474955000 | 0.618338000 | 0.466759000 |

|   |              |              |              |
|---|--------------|--------------|--------------|
| C | -2.593664000 | 0.160557000  | 1.141333000  |
| C | -0.329592000 | -0.154454000 | -0.162075000 |
| N | 0.035761000  | 2.284047000  | -0.204537000 |
| C | -0.817216000 | -1.116167000 | -1.253762000 |
| C | -1.599624000 | -2.295270000 | -0.733855000 |
| C | 0.479699000  | 1.067162000  | -0.848933000 |
| O | -1.473191000 | -2.788584000 | 0.368817000  |
| C | 1.976761000  | 0.851610000  | -0.841583000 |
| C | 2.769609000  | 1.322962000  | 0.207379000  |
| C | 4.127907000  | 1.024203000  | 0.258913000  |
| C | 4.718084000  | 0.261490000  | -0.747389000 |
| C | 3.946080000  | -0.177177000 | -1.819487000 |
| C | 2.585805000  | 0.122357000  | -1.865957000 |
| O | -2.442030000 | -2.772876000 | -1.650624000 |
| C | -3.216378000 | -3.901525000 | -1.239935000 |
| H | -4.358090000 | 0.751218000  | 2.241746000  |
| H | -3.883771000 | 3.173316000  | 2.024552000  |
| H | -1.867320000 | 3.987598000  | 0.849956000  |
| H | -2.778506000 | -0.905047000 | 1.248700000  |
| H | -1.451163000 | -0.520811000 | -1.920866000 |
| H | 0.003202000  | -1.500799000 | -1.872458000 |
| H | 0.144036000  | 1.041874000  | -1.900428000 |
| H | 2.303259000  | 1.957408000  | 0.955916000  |
| H | 4.733706000  | 1.398317000  | 1.078924000  |
| H | 5.778185000  | 0.032256000  | -0.708589000 |
| H | 4.405581000  | -0.739248000 | -2.627039000 |
| H | 1.987698000  | -0.193309000 | -2.719358000 |
| H | -2.563960000 | -4.730709000 | -0.958248000 |

|               |              |              |              |
|---------------|--------------|--------------|--------------|
| H             | -3.841106000 | -3.637724000 | -0.384409000 |
| H             | -3.830219000 | -4.166759000 | -2.097924000 |
| N             | 0.730611000  | -0.266428000 | 2.157530000  |
| N             | 2.082174000  | -1.996477000 | 1.976193000  |
| N             | 1.375115000  | -1.812088000 | 0.836654000  |
| C             | 0.532920000  | -0.773073000 | 0.913915000  |
| C             | 1.677851000  | -1.043909000 | 2.755085000  |
| H             | 2.034408000  | -0.873299000 | 3.758963000  |
| C             | 1.619814000  | -2.762861000 | -0.243707000 |
| H             | 2.436128000  | -3.392171000 | 0.103582000  |
| H             | 0.726621000  | -3.363380000 | -0.407146000 |
| H             | 1.927635000  | -2.229787000 | -1.141497000 |
| C             | 0.181830000  | 0.932479000  | 2.815557000  |
| H             | 0.720294000  | 1.033743000  | 3.758244000  |
| H             | 0.363159000  | 1.799142000  | 2.179623000  |
| H             | -0.885911000 | 0.813164000  | 2.997045000  |
| O             | -2.281244000 | 1.418109000  | -2.525607000 |
| H             | -1.717984000 | 2.211844000  | -2.645790000 |
| H             | -2.683840000 | 1.559449000  | -1.660000000 |
| O             | -0.572857000 | 3.605411000  | -2.451142000 |
| H             | -0.236951000 | 3.292941000  | -1.557647000 |
| H             | -1.049666000 | 4.421332000  | -2.271722000 |
| <b>A-TSb4</b> |              |              |              |
| C             | -3.580607000 | 1.104085000  | 1.585533000  |
| C             | -3.295193000 | 2.469327000  | 1.507010000  |
| C             | -2.107297000 | 2.930330000  | 0.947985000  |
| C             | -1.193738000 | 1.993072000  | 0.458170000  |
| C             | -1.500770000 | 0.626403000  | 0.486252000  |

|   |              |              |              |
|---|--------------|--------------|--------------|
| C | -2.678408000 | 0.172294000  | 1.066901000  |
| C | -0.350487000 | -0.149040000 | -0.144525000 |
| N | 0.090823000  | 2.234353000  | 0.004857000  |
| C | -0.858908000 | -1.051928000 | -1.283910000 |
| C | -1.762883000 | -2.169528000 | -0.833586000 |
| C | 0.519289000  | 1.027805000  | -0.750604000 |
| O | -1.661880000 | -2.767471000 | 0.219955000  |
| C | 1.991205000  | 0.783246000  | -0.706447000 |
| C | 2.831441000  | 1.295777000  | 0.292955000  |
| C | 4.186583000  | 0.978567000  | 0.324493000  |
| C | 4.739272000  | 0.141838000  | -0.642691000 |
| C | 3.927392000  | -0.348006000 | -1.663168000 |
| C | 2.575736000  | -0.017648000 | -1.699852000 |
| O | -2.694138000 | -2.459910000 | -1.743200000 |
| C | -3.584079000 | -3.520140000 | -1.390529000 |
| H | -4.507193000 | 0.767132000  | 2.037345000  |
| H | -4.010820000 | 3.187107000  | 1.897018000  |
| H | -1.875873000 | 3.989916000  | 0.904153000  |
| H | -2.892489000 | -0.889977000 | 1.135238000  |
| H | -1.368053000 | -0.395345000 | -1.996126000 |
| H | -0.028667000 | -1.493454000 | -1.846616000 |
| H | 0.016428000  | 1.221608000  | -1.997030000 |
| H | 2.405842000  | 1.968201000  | 1.032896000  |
| H | 4.818173000  | 1.389026000  | 1.107361000  |
| H | 5.795789000  | -0.104547000 | -0.616509000 |
| H | 4.353755000  | -0.969070000 | -2.445935000 |
| H | 1.953110000  | -0.353208000 | -2.527958000 |
| H | -3.028200000 | -4.442381000 | -1.209181000 |

|   |              |              |              |
|---|--------------|--------------|--------------|
| H | -4.140810000 | -3.260685000 | -0.487564000 |
| H | -4.258190000 | -3.634348000 | -2.236885000 |
| N | 0.697517000  | -0.388552000 | 2.176468000  |
| N | 1.972396000  | -2.168190000 | 1.945816000  |
| N | 1.250688000  | -1.938569000 | 0.820536000  |
| C | 0.457272000  | -0.862968000 | 0.925669000  |
| C | 1.622617000  | -1.212709000 | 2.745301000  |
| H | 2.003728000  | -1.072802000 | 3.744912000  |
| C | 1.434288000  | -2.894847000 | -0.268195000 |
| H | 2.173096000  | -3.605045000 | 0.095952000  |
| H | 0.492478000  | -3.402196000 | -0.466820000 |
| H | 1.823066000  | -2.383076000 | -1.146681000 |
| C | 0.188458000  | 0.804898000  | 2.867807000  |
| H | 0.708788000  | 0.850588000  | 3.824667000  |
| H | 0.416502000  | 1.689329000  | 2.273302000  |
| H | -0.885611000 | 0.720066000  | 3.028678000  |
| O | -0.677707000 | 1.506350000  | -2.997955000 |
| H | -0.801647000 | 3.045564000  | -2.550760000 |
| H | -0.105006000 | 1.489976000  | -3.773891000 |
| O | -0.823364000 | 3.945257000  | -2.091930000 |
| H | 0.101111000  | 3.063438000  | -0.602423000 |
| H | -1.749656000 | 4.052123000  | -1.853244000 |

**A-5b**

|   |             |              |              |
|---|-------------|--------------|--------------|
| C | 3.312376000 | -1.723816000 | 1.235712000  |
| C | 3.010183000 | -3.012519000 | 0.783034000  |
| C | 1.856126000 | -3.272185000 | 0.053399000  |
| C | 0.994773000 | -2.208609000 | -0.235285000 |

|   |              |              |              |
|---|--------------|--------------|--------------|
| C | 1.335143000  | -0.900920000 | 0.147490000  |
| C | 2.470369000  | -0.659317000 | 0.914175000  |
| C | 0.288430000  | 0.076307000  | -0.393491000 |
| N | -0.256824000 | -2.246344000 | -0.804831000 |
| C | 0.936261000  | 1.004863000  | -1.491869000 |
| C | 2.270529000  | 1.554572000  | -1.064961000 |
| C | -0.752251000 | -0.880427000 | -0.936475000 |
| O | 2.446609000  | 2.340301000  | -0.152878000 |
| C | -2.143531000 | -0.653876000 | -0.955019000 |
| C | -3.084007000 | -1.726899000 | -0.888102000 |
| C | -4.449923000 | -1.497105000 | -0.870138000 |
| C | -4.978943000 | -0.205485000 | -0.917941000 |
| C | -4.082712000 | 0.860919000  | -1.009445000 |
| C | -2.713965000 | 0.652158000  | -1.036204000 |
| O | 3.278201000  | 1.004598000  | -1.746111000 |
| C | 4.585824000  | 1.336008000  | -1.278954000 |
| H | 4.202750000  | -1.550735000 | 1.830586000  |
| H | 3.677851000  | -3.834009000 | 1.024708000  |
| H | 1.606933000  | -4.281708000 | -0.257989000 |
| H | 2.702901000  | 0.346907000  | 1.253737000  |
| H | 1.074255000  | 0.355272000  | -2.354600000 |
| H | 0.257255000  | 1.808633000  | -1.783288000 |
| H | -2.710366000 | -2.744900000 | -0.832409000 |
| H | -5.122037000 | -2.350299000 | -0.811860000 |
| H | -6.049585000 | -0.036686000 | -0.905596000 |
| H | -4.459848000 | 1.878764000  | -1.078400000 |
| H | -2.056616000 | 1.505240000  | -1.185102000 |
| H | 4.712867000  | 2.418483000  | -1.225569000 |

|   |              |              |              |
|---|--------------|--------------|--------------|
| H | 4.741015000  | 0.904728000  | -0.286446000 |
| H | 5.277326000  | 0.896829000  | -1.995125000 |
| N | -0.862109000 | 0.200492000  | 1.851056000  |
| N | -1.343168000 | 2.328504000  | 2.119153000  |
| N | -0.639053000 | 2.131391000  | 0.973234000  |
| C | -0.330868000 | 0.840562000  | 0.777082000  |
| C | -1.463439000 | 1.141098000  | 2.624874000  |
| H | -1.975942000 | 0.910826000  | 3.546025000  |
| C | -0.412094000 | 3.321770000  | 0.155293000  |
| H | -0.676507000 | 4.162882000  | 0.792185000  |
| H | 0.635015000  | 3.375136000  | -0.130160000 |
| H | -1.073445000 | 3.305794000  | -0.712946000 |
| C | -0.924309000 | -1.238515000 | 2.118007000  |
| H | -1.518603000 | -1.365299000 | 3.023110000  |
| H | -1.402485000 | -1.739774000 | 1.274475000  |
| H | 0.079858000  | -1.633689000 | 2.270288000  |
| H | -0.356831000 | -2.841394000 | -1.621102000 |

**A-TSb5**

|   |              |              |              |
|---|--------------|--------------|--------------|
| C | 3.693694000  | -1.884046000 | 0.041034000  |
| C | 3.195256000  | -3.137265000 | -0.331865000 |
| C | 1.867180000  | -3.302774000 | -0.708098000 |
| C | 1.042436000  | -2.177474000 | -0.719917000 |
| C | 1.543426000  | -0.905779000 | -0.397005000 |
| C | 2.864978000  | -0.763070000 | 0.013527000  |
| C | 0.412925000  | 0.085136000  | -0.449835000 |
| N | -0.318560000 | -2.101948000 | -0.921566000 |
| C | 0.782895000  | 1.436123000  | -1.091080000 |

|   |              |              |              |
|---|--------------|--------------|--------------|
| C | 1.938809000  | 2.132234000  | -0.418828000 |
| C | -0.667419000 | -0.700496000 | -1.040711000 |
| O | 1.958668000  | 2.514536000  | 0.730589000  |
| C | -2.067143000 | -0.377649000 | -1.088465000 |
| C | -3.047205000 | -1.346487000 | -0.759046000 |
| C | -4.400249000 | -1.040775000 | -0.762415000 |
| C | -4.846529000 | 0.238839000  | -1.089807000 |
| C | -3.902723000 | 1.201432000  | -1.443834000 |
| C | -2.548223000 | 0.899833000  | -1.458617000 |
| O | 2.985806000  | 2.274097000  | -1.245948000 |
| C | 4.129009000  | 2.904148000  | -0.669840000 |
| H | 4.727340000  | -1.785799000 | 0.354413000  |
| H | 3.852886000  | -4.000918000 | -0.315039000 |
| H | 1.475958000  | -4.281975000 | -0.966884000 |
| H | 3.248632000  | 0.196816000  | 0.345377000  |
| H | 1.034057000  | 1.235114000  | -2.132804000 |
| H | -0.069517000 | 2.115458000  | -1.070658000 |
| H | -2.723344000 | -2.336819000 | -0.454482000 |
| H | -5.118134000 | -1.809531000 | -0.489029000 |
| H | -5.904923000 | 0.475557000  | -1.085468000 |
| H | -4.227387000 | 2.196335000  | -1.737058000 |
| H | -1.851235000 | 1.648716000  | -1.820177000 |
| H | 3.869838000  | 3.895095000  | -0.291657000 |
| H | 4.517377000  | 2.305510000  | 0.158421000  |
| H | 4.865057000  | 2.973749000  | -1.468365000 |
| N | -0.419083000 | -0.663670000 | 1.987267000  |
| N | -2.007033000 | 0.816588000  | 2.386576000  |
| N | -1.122895000 | 1.273420000  | 1.444804000  |



|   |              |              |              |
|---|--------------|--------------|--------------|
| C | -0.151302000 | 0.382811000  | 1.137226000  |
| C | -1.553101000 | -0.355534000 | 2.685534000  |
| H | -1.990333000 | -1.014498000 | 3.420927000  |
| C | -1.228266000 | 2.685641000  | 1.098511000  |
| H | -1.671637000 | 3.182688000  | 1.961087000  |
| H | -0.228135000 | 3.078913000  | 0.925998000  |
| H | -1.877051000 | 2.823965000  | 0.232856000  |
| C | 0.374845000  | -1.859667000 | 2.263311000  |
| H | 0.222015000  | -2.121815000 | 3.312312000  |
| H | 0.060081000  | -2.682684000 | 1.623653000  |
| H | 1.430106000  | -1.647096000 | 2.098093000  |
| H | -0.724204000 | -2.717664000 | -1.616887000 |

**Table S3: The energies for species of path a in series B**

|                   | <b>E</b>     | <b>G</b>     |
|-------------------|--------------|--------------|
| B-TSa1- <i>Si</i> | -1450.954177 | -1451.015226 |
| B-TSa1- <i>Re</i> | -1450.944136 | -1451.005971 |
| B-1a- <i>Si</i>   | -1450.963154 | -1451.023688 |
| B-1a- <i>Re</i>   | -1450.955426 | -1451.016396 |
| B-11a             | -1917.872872 | -1917.949611 |
| B-TSa2            | -1917.847827 | -1917.925504 |
| B-2a              | -1450.981446 | -1451.044633 |
| B-TSa3            | -1450.953517 | -1451.012490 |
| B-3a              | -1450.954909 | -1451.014599 |
| B-4a              | -1917.864744 | -1917.941482 |
| B-TSa4            | -1917.853883 | -1917.929071 |
| B-5a              | -1917.872876 | -1917.946959 |
| B-TSa5            | -1917.865292 | -1917.939983 |
| B-6a              | -1450.957608 | -1451.016649 |
| B-TSa6            | -1450.959283 | -1451.016645 |

**Table S4: The energies for species of path b in series B**

|                   | <b>E</b>     | <b>G</b>     |
|-------------------|--------------|--------------|
| B-TSb1- <i>Si</i> | -1450.946589 | -1451.006032 |
| B-TSb1- <i>Re</i> | -1450.942048 | -1451.001121 |
| B-1b- <i>Si</i>   | -1450.976905 | -1451.037046 |
| B-1b- <i>Re</i>   | -1450.972046 | -1451.032642 |
| B-11b             | -1917.879072 | -1917.960072 |
| B-TSb2            | -1917.869539 | -1917.948974 |
| B-2b              | -1451.001448 | -1451.063427 |
| B-TSb3            | -1450.975991 | -1451.033104 |
| B-3b              | -1450.981631 | -1451.038548 |
| B-4b              | -1917.888860 | -1917.961101 |
| B-TSb4            | -1917.875521 | -1917.950217 |
| B-5b              | -1450.952772 | -1451.010943 |
| B-TSb5            | -1450.947198 | -1451.005782 |

## Cartesian coordinates of the optimized species in series B

### B-TSa1-Si

|   |              |              |              |
|---|--------------|--------------|--------------|
| C | -1.696109000 | -2.843714000 | -1.952001000 |
| C | -0.309599000 | -2.742943000 | -1.834781000 |
| C | 0.302132000  | -1.511119000 | -1.651879000 |
| C | -0.457859000 | -0.323822000 | -1.570489000 |
| C | -1.865538000 | -0.435875000 | -1.728230000 |
| C | -2.461094000 | -1.684832000 | -1.909405000 |
| C | -2.647382000 | 0.807451000  | -1.787928000 |
| N | 0.021797000  | 0.930987000  | -1.256351000 |
| C | -3.837832000 | 1.083912000  | -1.229137000 |
| C | -4.528139000 | 0.244277000  | -0.229923000 |
| C | 1.267143000  | 1.045218000  | -0.796053000 |
| O | -4.051021000 | -0.645418000 | 0.444546000  |
| C | 1.733481000  | 2.438158000  | -0.501018000 |
| C | 3.090346000  | 2.757104000  | -0.545091000 |
| C | 3.522529000  | 4.049922000  | -0.259348000 |
| C | 2.596996000  | 5.034713000  | 0.071861000  |
| C | 1.237663000  | 4.724648000  | 0.100707000  |
| C | 0.807346000  | 3.435195000  | -0.189192000 |
| O | -5.811353000 | 0.635818000  | -0.092127000 |
| C | -6.558702000 | -0.082401000 | 0.884216000  |
| H | -2.169805000 | -3.809029000 | -2.093135000 |
| H | 0.305489000  | -3.637519000 | -1.884884000 |
| H | 1.384061000  | -1.473151000 | -1.573377000 |
| H | -3.539014000 | -1.737478000 | -2.029703000 |

|   |              |              |              |
|---|--------------|--------------|--------------|
| H | -2.192379000 | 1.594403000  | -2.386965000 |
| H | -4.342264000 | 2.014944000  | -1.464383000 |
| H | 2.084464000  | 0.406155000  | -1.169482000 |
| H | 3.810261000  | 1.991216000  | -0.825327000 |
| H | 4.580513000  | 4.289104000  | -0.302606000 |
| H | 2.931010000  | 6.042844000  | 0.296054000  |
| H | 0.511939000  | 5.495687000  | 0.341305000  |
| H | -0.247149000 | 3.177204000  | -0.208233000 |
| H | -7.566208000 | 0.328681000  | 0.851365000  |
| H | -6.569721000 | -1.149253000 | 0.650943000  |
| H | -6.123271000 | 0.052058000  | 1.877658000  |
| C | -2.017104000 | 0.099223000  | 2.658213000  |
| C | -1.623310000 | -1.384886000 | 2.455523000  |
| C | -0.235592000 | -1.247513000 | 1.920957000  |
| N | -0.024300000 | 0.023409000  | 1.465604000  |
| C | -1.197871000 | 0.882358000  | 1.607995000  |
| N | 0.797897000  | -2.003848000 | 1.712291000  |
| N | 1.666308000  | -1.139074000 | 1.075415000  |
| C | 1.188514000  | 0.110958000  | 0.882908000  |
| C | 2.927838000  | -1.606106000 | 0.631340000  |
| C | 3.972315000  | -0.695517000 | 0.488616000  |
| C | 5.197501000  | -1.141743000 | 0.003440000  |
| C | 5.379890000  | -2.485218000 | -0.313053000 |
| C | 4.329579000  | -3.386331000 | -0.147477000 |
| C | 3.094035000  | -2.954119000 | 0.320747000  |
| H | -1.731289000 | 0.424372000  | 3.662932000  |
| H | -3.087195000 | 0.249496000  | 2.521443000  |
| H | -2.253708000 | -1.836411000 | 1.681530000  |

|   |              |              |              |
|---|--------------|--------------|--------------|
| H | -1.678645000 | -1.983212000 | 3.365088000  |
| H | -1.701659000 | 0.948116000  | 0.639372000  |
| H | -0.899911000 | 1.880332000  | 1.932802000  |
| H | 3.814155000  | 0.340515000  | 0.772203000  |
| H | 6.014300000  | -0.436829000 | -0.111661000 |
| H | 6.338617000  | -2.831438000 | -0.684022000 |
| H | 4.469595000  | -4.433968000 | -0.392403000 |
| H | 2.257816000  | -3.632357000 | 0.446309000  |

**B-TSa1-Re**

|   |              |              |              |
|---|--------------|--------------|--------------|
| C | 1.707110000  | -2.852229000 | -2.187991000 |
| C | 0.327475000  | -2.882179000 | -2.013774000 |
| C | -0.373964000 | -1.721908000 | -1.704184000 |
| C | 0.284628000  | -0.482842000 | -1.556200000 |
| C | 1.704784000  | -0.469605000 | -1.718469000 |
| C | 2.384043000  | -1.644128000 | -2.040457000 |
| C | 2.367034000  | 0.833070000  | -1.598115000 |
| N | -0.311744000 | 0.700834000  | -1.187587000 |
| C | 3.565975000  | 1.192702000  | -1.101633000 |
| C | 4.538124000  | 0.349424000  | -0.385389000 |
| C | -1.627326000 | 0.752715000  | -1.014502000 |
| O | 4.638027000  | -0.857806000 | -0.364433000 |
| C | -2.201879000 | 2.107661000  | -0.718271000 |
| C | -3.574944000 | 2.329169000  | -0.815626000 |
| C | -4.114632000 | 3.578776000  | -0.528252000 |
| C | -3.277051000 | 4.621891000  | -0.140768000 |
| C | -1.902577000 | 4.409434000  | -0.054671000 |
| C | -1.364386000 | 3.159721000  | -0.346479000 |

|   |              |              |              |
|---|--------------|--------------|--------------|
| O | 5.373794000  | 1.139474000  | 0.337877000  |
| C | 6.338277000  | 0.432366000  | 1.106514000  |
| H | 2.252743000  | -3.756038000 | -2.436094000 |
| H | -0.212711000 | -3.819686000 | -2.118570000 |
| H | -1.451309000 | -1.784694000 | -1.575421000 |
| H | 3.457519000  | -1.605394000 | -2.171573000 |
| H | 1.742785000  | 1.656658000  | -1.938246000 |
| H | 3.822468000  | 2.246914000  | -1.100167000 |
| H | -2.297281000 | 0.155695000  | -1.664859000 |
| H | -4.224241000 | 1.516461000  | -1.137230000 |
| H | -5.184560000 | 3.742033000  | -0.613005000 |
| H | -3.693361000 | 5.599135000  | 0.082754000  |
| H | -1.246944000 | 5.225384000  | 0.233770000  |
| H | -0.296508000 | 2.967155000  | -0.305845000 |
| H | 6.956881000  | 1.190745000  | 1.584682000  |
| H | 5.849027000  | -0.190004000 | 1.862098000  |
| H | 6.944577000  | -0.214641000 | 0.468800000  |
| N | -3.085045000 | -1.265465000 | 0.439195000  |
| N | -1.530922000 | -2.211295000 | 1.670125000  |
| N | -1.184842000 | -0.946486000 | 1.248718000  |
| C | -2.104079000 | -0.334378000 | 0.481688000  |
| C | -2.703914000 | -2.373353000 | 1.144852000  |
| C | -4.366587000 | -1.421189000 | -0.235938000 |
| H | -4.977920000 | -0.525607000 | -0.119416000 |
| H | -4.197818000 | -1.603443000 | -1.303341000 |
| C | 0.089516000  | -0.411032000 | 1.596541000  |
| C | 1.196237000  | -1.251743000 | 1.600342000  |
| C | 0.194394000  | 0.948763000  | 1.860703000  |

|   |              |              |              |
|---|--------------|--------------|--------------|
| C | 2.443133000  | -0.709112000 | 1.886879000  |
| H | 1.074970000  | -2.297671000 | 1.341163000  |
| C | 1.449274000  | 1.480064000  | 2.133619000  |
| H | -0.695388000 | 1.570974000  | 1.834363000  |
| C | 2.570369000  | 0.653773000  | 2.151393000  |
| H | 3.321809000  | -1.343509000 | 1.853369000  |
| H | 1.550668000  | 2.542848000  | 2.327059000  |
| H | 3.551030000  | 1.079696000  | 2.341974000  |
| C | -4.953592000 | -2.654709000 | 0.494697000  |
| H | -5.570155000 | -2.312142000 | 1.329080000  |
| H | -5.580361000 | -3.255902000 | -0.164040000 |
| C | -3.738430000 | -3.447331000 | 1.046898000  |
| H | -3.401467000 | -4.215702000 | 0.344005000  |
| H | -3.943216000 | -3.928480000 | 2.003538000  |

### **B-1a-Si**

|   |              |              |              |
|---|--------------|--------------|--------------|
| C | -1.605083000 | -3.063272000 | -1.913215000 |
| C | -0.223380000 | -2.923675000 | -1.781585000 |
| C | 0.367522000  | -1.674560000 | -1.657903000 |
| C | -0.402772000 | -0.478182000 | -1.661570000 |
| C | -1.813587000 | -0.643567000 | -1.839324000 |
| C | -2.383083000 | -1.909828000 | -1.945467000 |
| C | -2.641607000 | 0.560944000  | -1.940231000 |
| N | 0.045239000  | 0.781662000  | -1.435863000 |
| C | -3.784166000 | 0.815234000  | -1.277638000 |
| C | -4.259561000 | 0.038369000  | -0.114837000 |
| C | 1.307408000  | 0.894417000  | -0.787109000 |
| O | -3.579095000 | -0.564652000 | 0.691574000  |



|   |              |              |              |
|---|--------------|--------------|--------------|
| C | 1.710991000  | 2.354099000  | -0.602570000 |
| C | 2.602218000  | 2.750054000  | 0.396675000  |
| C | 2.983180000  | 4.083781000  | 0.519297000  |
| C | 2.471502000  | 5.035620000  | -0.358471000 |
| C | 1.573364000  | 4.646325000  | -1.349375000 |
| C | 1.189674000  | 3.313678000  | -1.468949000 |
| O | -5.598495000 | 0.142606000  | 0.020470000  |
| C | -6.140411000 | -0.521987000 | 1.156260000  |
| H | -2.060969000 | -4.042255000 | -2.008451000 |
| H | 0.412425000  | -3.806546000 | -1.779080000 |
| H | 1.449658000  | -1.617236000 | -1.584759000 |
| H | -3.460683000 | -1.981235000 | -2.076282000 |
| H | -2.297456000 | 1.310310000  | -2.653202000 |
| H | -4.401242000 | 1.667256000  | -1.544415000 |
| H | 2.158637000  | 0.361207000  | -1.254152000 |
| H | 2.989020000  | 2.017940000  | 1.103798000  |
| H | 3.672831000  | 4.379214000  | 1.303869000  |
| H | 2.765577000  | 6.076246000  | -0.264804000 |
| H | 1.164606000  | 5.386312000  | -2.030645000 |
| H | 0.475252000  | 2.983260000  | -2.214747000 |
| H | -7.216829000 | -0.364594000 | 1.110791000  |
| H | -5.905482000 | -1.588177000 | 1.126089000  |
| H | -5.732548000 | -0.102848000 | 2.080080000  |
| C | -1.817687000 | 1.153119000  | 2.616960000  |
| C | -1.424178000 | -0.300093000 | 2.995435000  |
| C | -0.143792000 | -0.473133000 | 2.245102000  |
| N | 0.008639000  | 0.519832000  | 1.330168000  |
| C | -1.117365000 | 1.453064000  | 1.270579000  |

|   |              |              |              |
|---|--------------|--------------|--------------|
| N | 0.813963000  | -1.350434000 | 2.163809000  |
| N | 1.579590000  | -0.877110000 | 1.122753000  |
| C | 1.083235000  | 0.246071000  | 0.578066000  |
| C | 2.716088000  | -1.623807000 | 0.697776000  |
| C | 3.866393000  | -0.965906000 | 0.275432000  |
| C | 4.946396000  | -1.722541000 | -0.172698000 |
| C | 4.876251000  | -3.111457000 | -0.175780000 |
| C | 3.719660000  | -3.753713000 | 0.265786000  |
| C | 2.628549000  | -3.013990000 | 0.701423000  |
| H | -1.462963000 | 1.846765000  | 3.384008000  |
| H | -2.898359000 | 1.255250000  | 2.519947000  |
| H | -2.155909000 | -1.007145000 | 2.594228000  |
| H | -1.313521000 | -0.457591000 | 4.068652000  |
| H | -1.715492000 | 1.194856000  | 0.395449000  |
| H | -0.749947000 | 2.475438000  | 1.171722000  |
| H | 3.919684000  | 0.117607000  | 0.301911000  |
| H | 5.846405000  | -1.219154000 | -0.508697000 |
| H | 5.722738000  | -3.695779000 | -0.520374000 |
| H | 3.661922000  | -4.836796000 | 0.259377000  |
| H | 1.706808000  | -3.483963000 | 1.024863000  |

**B-1a-Re**

|   |              |              |             |
|---|--------------|--------------|-------------|
| C | -1.766338000 | -3.247864000 | 1.671556000 |
| C | -0.372267000 | -3.233928000 | 1.646874000 |
| C | 0.334333000  | -2.042123000 | 1.573449000 |
| C | -0.326965000 | -0.778315000 | 1.512261000 |
| C | -1.773370000 | -0.813614000 | 1.577137000 |
| C | -2.447304000 | -2.033628000 | 1.647357000 |

|   |              |              |              |
|---|--------------|--------------|--------------|
| C | -2.433100000 | 0.482839000  | 1.615133000  |
| N | 0.258845000  | 0.415861000  | 1.330497000  |
| C | -3.628084000 | 0.936506000  | 1.173013000  |
| C | -4.630695000 | 0.231109000  | 0.370006000  |
| C | 1.653575000  | 0.425810000  | 1.124562000  |
| O | -4.745868000 | -0.957729000 | 0.148481000  |
| C | 2.185675000  | 1.849541000  | 0.940563000  |
| C | 3.555323000  | 2.109789000  | 0.982631000  |
| C | 4.038073000  | 3.399910000  | 0.783190000  |
| C | 3.146621000  | 4.441905000  | 0.540663000  |
| C | 1.777340000  | 4.186816000  | 0.509002000  |
| C | 1.294770000  | 2.895977000  | 0.709674000  |
| O | -5.491517000 | 1.129428000  | -0.182360000 |
| C | -6.504966000 | 0.552900000  | -0.993845000 |
| H | -2.311310000 | -4.183108000 | 1.731304000  |
| H | 0.177187000  | -4.172040000 | 1.692022000  |
| H | 1.421301000  | -2.084614000 | 1.596041000  |
| H | -3.528996000 | -2.020994000 | 1.686859000  |
| H | -1.794212000 | 1.248798000  | 2.053062000  |
| H | -3.856353000 | 1.986552000  | 1.321308000  |
| H | 2.271274000  | -0.054802000 | 1.920437000  |
| H | 4.251950000  | 1.301678000  | 1.201612000  |
| H | 5.105308000  | 3.593612000  | 0.826321000  |
| H | 3.518541000  | 5.450108000  | 0.387916000  |
| H | 1.079332000  | 4.999850000  | 0.333978000  |
| H | 0.235440000  | 2.660046000  | 0.703211000  |
| H | -7.139284000 | 1.378099000  | -1.315476000 |
| H | -6.067879000 | 0.048996000  | -1.861119000 |

|   |              |              |              |
|---|--------------|--------------|--------------|
| H | -7.084415000 | -0.181030000 | -0.428825000 |
| N | 3.120364000  | -1.128071000 | -0.316620000 |
| N | 1.911416000  | -1.396494000 | -2.132793000 |
| N | 1.318995000  | -0.530196000 | -1.248694000 |
| C | 2.031545000  | -0.365832000 | -0.129731000 |
| C | 3.006218000  | -1.743633000 | -1.531810000 |
| C | 4.309514000  | -1.533043000 | 0.432672000  |
| H | 5.063444000  | -0.744075000 | 0.368728000  |
| H | 4.059557000  | -1.711832000 | 1.480014000  |
| C | 0.013190000  | -0.003781000 | -1.557957000 |
| C | -1.065707000 | -0.875253000 | -1.505547000 |
| C | -0.118240000 | 1.331121000  | -1.917030000 |
| C | -2.330936000 | -0.378437000 | -1.799203000 |
| H | -0.919582000 | -1.904426000 | -1.191140000 |
| C | -1.389997000 | 1.815246000  | -2.198727000 |
| H | 0.755256000  | 1.974289000  | -1.945423000 |
| C | -2.493139000 | 0.964326000  | -2.130457000 |
| H | -3.192209000 | -1.031307000 | -1.711493000 |
| H | -1.521017000 | 2.859868000  | -2.460064000 |
| H | -3.488777000 | 1.355369000  | -2.318299000 |
| C | 4.723023000  | -2.812596000 | -0.334151000 |
| H | 5.801939000  | -2.965400000 | -0.310137000 |
| H | 4.243915000  | -3.675429000 | 0.134527000  |
| C | 4.173993000  | -2.643594000 | -1.775326000 |
| H | 3.881656000  | -3.587828000 | -2.234424000 |
| H | 4.897181000  | -2.150608000 | -2.432399000 |

**B-11a**

|   |              |              |              |
|---|--------------|--------------|--------------|
| C | -2.298841000 | -1.950073000 | -3.088149000 |
| C | -1.009342000 | -2.282071000 | -2.675995000 |
| C | -0.325309000 | -1.504641000 | -1.748873000 |
| C | -0.911805000 | -0.346856000 | -1.170532000 |
| C | -2.203254000 | 0.016661000  | -1.667055000 |
| C | -2.874039000 | -0.785776000 | -2.583484000 |
| C | -2.752406000 | 1.297483000  | -1.210499000 |
| N | -0.431211000 | 0.385596000  | -0.125187000 |
| C | -3.979782000 | 1.575518000  | -0.740611000 |
| C | -5.005042000 | 0.570451000  | -0.399760000 |
| C | 0.666647000  | -0.165615000 | 0.618355000  |
| O | -4.845076000 | -0.618135000 | -0.209768000 |
| C | 0.911960000  | 0.652097000  | 1.883136000  |
| C | 2.201722000  | 1.017535000  | 2.268004000  |
| C | 2.403234000  | 1.735884000  | 3.445495000  |
| C | 1.320491000  | 2.098485000  | 4.240928000  |
| C | 0.027421000  | 1.759575000  | 3.843993000  |
| C | -0.175443000 | 1.043131000  | 2.669124000  |
| O | -6.212435000 | 1.157356000  | -0.257491000 |
| C | -7.267651000 | 0.275647000  | 0.108357000  |
| H | -2.828491000 | -2.560630000 | -3.810549000 |
| H | -0.518100000 | -3.158627000 | -3.092005000 |
| H | 0.696324000  | -1.772575000 | -1.492217000 |
| H | -3.861648000 | -0.475090000 | -2.913768000 |
| H | -2.053470000 | 2.129451000  | -1.291406000 |
| H | -4.263089000 | 2.604646000  | -0.544395000 |
| H | 1.627738000  | -0.243553000 | 0.079469000  |
| H | 3.032752000  | 0.803854000  | 1.602188000  |

|   |              |              |              |
|---|--------------|--------------|--------------|
| H | 3.408437000  | 2.032245000  | 3.728234000  |
| H | 1.479853000  | 2.661138000  | 5.155402000  |
| H | -0.823588000 | 2.063638000  | 4.445696000  |
| H | -1.178911000 | 0.819212000  | 2.318832000  |
| H | -8.164924000 | 0.889685000  | 0.166458000  |
| H | -7.388674000 | -0.510375000 | -0.640458000 |
| H | -7.061278000 | -0.193083000 | 1.073755000  |
| N | -0.938034000 | -2.041054000 | 1.273905000  |
| N | 0.292208000  | -3.855808000 | 1.015706000  |
| N | 1.034084000  | -2.708738000 | 0.897689000  |
| C | 0.295285000  | -1.593483000 | 1.010137000  |
| C | -0.906608000 | -3.406804000 | 1.238339000  |
| C | -2.310647000 | -1.512739000 | 1.413318000  |
| H | -2.448580000 | -0.632272000 | 0.787959000  |
| H | -2.467401000 | -1.261305000 | 2.466885000  |
| O | 3.032914000  | 1.715593000  | -0.577223000 |
| H | 2.134269000  | 2.098331000  | -0.671475000 |
| O | 0.464797000  | 2.799140000  | -0.911400000 |
| H | 0.005199000  | 2.017627000  | -0.478753000 |
| C | 2.395213000  | -2.780397000 | 0.470561000  |
| C | 2.702576000  | -3.563049000 | -0.638635000 |
| C | 3.360924000  | -2.039986000 | 1.140456000  |
| C | 4.015225000  | -3.581487000 | -1.096691000 |
| H | 1.915771000  | -4.127704000 | -1.127599000 |
| C | 4.667203000  | -2.056886000 | 0.661783000  |
| H | 3.085768000  | -1.461824000 | 2.015995000  |
| C | 4.992665000  | -2.822409000 | -0.455531000 |
| H | 4.271369000  | -4.177824000 | -1.965437000 |

|   |              |              |              |
|---|--------------|--------------|--------------|
| H | 5.429670000  | -1.472270000 | 1.165315000  |
| H | 6.011695000  | -2.827582000 | -0.827539000 |
| C | -3.129350000 | -2.735204000 | 0.960959000  |
| H | -4.130807000 | -2.730675000 | 1.389242000  |
| H | -3.227212000 | -2.686366000 | -0.127741000 |
| C | -2.284169000 | -3.968197000 | 1.372311000  |
| H | -2.470935000 | -4.267157000 | 2.409363000  |
| H | -2.432853000 | -4.835377000 | 0.729074000  |
| C | 3.499331000  | 1.401404000  | -1.884383000 |
| C | 4.987141000  | 1.105738000  | -1.736985000 |
| C | 2.753496000  | 0.170629000  | -2.402013000 |
| C | 3.268725000  | 2.597013000  | -2.809809000 |
| H | 5.508930000  | 1.986314000  | -1.352033000 |
| H | 5.129368000  | 0.281089000  | -1.031095000 |
| H | 5.428067000  | 0.823744000  | -2.697916000 |
| H | 1.673617000  | 0.358276000  | -2.391787000 |
| H | 3.050702000  | -0.084227000 | -3.424668000 |
| H | 2.966041000  | -0.692965000 | -1.757072000 |
| H | 3.655775000  | 2.401736000  | -3.814819000 |
| H | 2.197983000  | 2.814077000  | -2.879516000 |
| H | 3.775120000  | 3.479274000  | -2.405256000 |
| C | 0.274927000  | 4.031058000  | -0.218558000 |
| C | -1.175960000 | 4.152055000  | 0.249590000  |
| C | 1.220386000  | 4.117865000  | 0.981855000  |
| C | 0.607908000  | 5.124457000  | -1.229178000 |
| H | -1.856841000 | 4.211117000  | -0.606186000 |
| H | -1.448614000 | 3.280087000  | 0.855634000  |
| H | -1.312086000 | 5.052443000  | 0.856924000  |

|   |              |             |              |
|---|--------------|-------------|--------------|
| H | 2.243648000  | 3.887318000 | 0.668235000  |
| H | 1.202359000  | 5.122905000 | 1.416688000  |
| H | 0.927850000  | 3.405336000 | 1.757968000  |
| H | 0.458898000  | 6.117906000 | -0.795293000 |
| H | 1.651623000  | 5.034677000 | -1.545805000 |
| H | -0.029253000 | 5.021665000 | -2.112023000 |

### **B-TSa2**

|   |              |              |              |
|---|--------------|--------------|--------------|
| C | -2.332995000 | -1.036315000 | -3.431241000 |
| C | -1.124568000 | -1.568029000 | -3.000342000 |
| C | -0.540060000 | -1.137077000 | -1.811744000 |
| C | -1.142161000 | -0.140665000 | -1.030810000 |
| C | -2.374386000 | 0.392692000  | -1.470751000 |
| C | -2.948462000 | -0.057371000 | -2.655165000 |
| C | -3.032805000 | 1.457925000  | -0.681900000 |
| N | -0.673395000 | 0.249559000  | 0.230176000  |
| C | -4.219524000 | 1.362466000  | -0.071890000 |
| C | -5.001565000 | 0.107285000  | 0.038035000  |
| C | 0.665789000  | -0.190461000 | 0.644625000  |
| O | -4.584702000 | -1.027948000 | -0.051633000 |
| C | 1.047058000  | 0.555818000  | 1.918509000  |
| C | 2.189546000  | 1.361267000  | 1.961776000  |
| C | 2.514916000  | 2.060650000  | 3.122582000  |
| C | 1.696971000  | 1.978708000  | 4.245950000  |
| C | 0.546741000  | 1.192889000  | 4.206534000  |
| C | 0.228097000  | 0.486521000  | 3.050501000  |
| O | -6.291645000 | 0.380186000  | 0.310694000  |
| C | -7.126489000 | -0.762390000 | 0.472132000  |



|   |              |              |              |
|---|--------------|--------------|--------------|
| H | -2.790143000 | -1.372764000 | -4.355205000 |
| H | -0.616768000 | -2.323907000 | -3.592231000 |
| H | 0.416698000  | -1.554543000 | -1.520138000 |
| H | -3.893892000 | 0.377096000  | -2.967815000 |
| H | -2.486760000 | 2.401394000  | -0.629998000 |
| H | -4.666505000 | 2.229105000  | 0.404063000  |
| H | 1.458456000  | 0.308148000  | -0.298345000 |
| H | 2.785991000  | 1.450268000  | 1.057366000  |
| H | 3.401741000  | 2.686871000  | 3.139964000  |
| H | 1.948072000  | 2.531239000  | 5.145883000  |
| H | -0.101171000 | 1.132851000  | 5.075578000  |
| H | -0.680112000 | -0.110622000 | 3.010824000  |
| H | -8.124669000 | -0.377223000 | 0.673068000  |
| H | -7.123992000 | -1.370329000 | -0.435071000 |
| H | -6.777360000 | -1.377152000 | 1.305300000  |
| N | -0.558849000 | -2.369330000 | 1.048006000  |
| N | 1.022522000  | -3.873177000 | 0.732835000  |
| N | 1.521316000  | -2.594604000 | 0.684313000  |
| C | 0.569190000  | -1.648549000 | 0.860030000  |
| C | -0.243575000 | -3.693930000 | 0.945688000  |
| C | -1.994509000 | -2.154395000 | 1.311466000  |
| H | -2.384144000 | -1.308250000 | 0.753867000  |
| H | -2.123561000 | -1.983799000 | 2.384847000  |
| O | 1.877931000  | 1.345643000  | -0.962354000 |
| H | 0.681493000  | 2.376462000  | -0.760440000 |
| O | -0.174133000 | 2.899372000  | -0.600456000 |
| H | -0.751935000 | 1.262582000  | 0.345346000  |
| C | 2.881274000  | -2.407357000 | 0.291927000  |

|   |              |              |              |
|---|--------------|--------------|--------------|
| C | 3.389541000  | -3.216936000 | -0.721496000 |
| C | 3.661380000  | -1.444035000 | 0.917036000  |
| C | 4.707538000  | -3.040128000 | -1.121881000 |
| H | 2.751341000  | -3.964628000 | -1.178205000 |
| C | 4.974470000  | -1.264241000 | 0.490487000  |
| H | 3.250419000  | -0.855384000 | 1.727828000  |
| C | 5.498317000  | -2.059912000 | -0.523726000 |
| H | 5.113748000  | -3.660759000 | -1.913200000 |
| H | 5.587170000  | -0.504021000 | 0.963142000  |
| H | 6.522933000  | -1.917458000 | -0.850415000 |
| C | -2.578015000 | -3.502893000 | 0.851991000  |
| H | -3.507882000 | -3.738325000 | 1.369289000  |
| H | -2.791007000 | -3.427269000 | -0.217707000 |
| C | -1.460837000 | -4.547388000 | 1.098666000  |
| H | -1.501758000 | -4.957563000 | 2.113201000  |
| H | -1.473166000 | -5.378262000 | 0.393017000  |
| C | 2.459013000  | 1.310141000  | -2.240520000 |
| C | 3.707492000  | 2.202208000  | -2.220836000 |
| C | 2.886532000  | -0.116358000 | -2.602781000 |
| C | 1.455073000  | 1.832901000  | -3.275400000 |
| H | 3.434165000  | 3.223897000  | -1.942410000 |
| H | 4.412412000  | 1.821945000  | -1.473066000 |
| H | 4.209283000  | 2.228341000  | -3.194821000 |
| H | 2.012853000  | -0.769289000 | -2.686878000 |
| H | 3.419845000  | -0.142031000 | -3.559610000 |
| H | 3.549607000  | -0.510767000 | -1.826121000 |
| H | 1.879952000  | 1.843280000  | -4.285504000 |
| H | 0.559449000  | 1.202331000  | -3.274672000 |

|   |              |             |              |
|---|--------------|-------------|--------------|
| H | 1.145476000  | 2.849727000 | -3.012503000 |
| C | 0.058140000  | 4.135386000 | 0.055393000  |
| C | -0.373242000 | 4.009238000 | 1.520062000  |
| C | 1.534898000  | 4.516940000 | -0.038002000 |
| C | -0.801246000 | 5.183916000 | -0.651306000 |
| H | -1.419339000 | 3.685025000 | 1.568260000  |
| H | 0.240957000  | 3.267728000 | 2.039466000  |
| H | -0.284778000 | 4.965088000 | 2.047524000  |
| H | 1.821353000  | 4.648151000 | -1.086667000 |
| H | 1.731659000  | 5.452495000 | 0.495007000  |
| H | 2.158687000  | 3.724699000 | 0.386920000  |
| H | -0.679788000 | 6.172523000 | -0.196945000 |
| H | -0.522063000 | 5.240954000 | -1.707125000 |
| H | -1.858963000 | 4.905854000 | -0.593569000 |

**B-2a**

|   |              |              |              |
|---|--------------|--------------|--------------|
| C | 0.639631000  | 4.626027000  | -0.790405000 |
| C | -0.109913000 | 4.701185000  | 0.382024000  |
| C | -0.622807000 | 3.550988000  | 0.961343000  |
| C | 0.837601000  | 3.386765000  | -1.382132000 |
| C | 2.862314000  | 0.642627000  | -1.665691000 |
| C | -0.307349000 | -0.113223000 | 0.967524000  |
| O | 3.285994000  | 1.674637000  | -1.199398000 |
| C | 0.911482000  | -0.345224000 | 1.773634000  |
| C | 0.987424000  | -1.428683000 | 2.662332000  |
| C | 2.133691000  | -1.665277000 | 3.416410000  |
| C | 3.224833000  | -0.806609000 | 3.314723000  |
| C | 3.155511000  | 0.289507000  | 2.455741000  |

|   |              |              |              |
|---|--------------|--------------|--------------|
| C | 2.014816000  | 0.521125000  | 1.694126000  |
| O | 3.648784000  | -0.443686000 | -1.857226000 |
| C | 4.991984000  | -0.283808000 | -1.408690000 |
| H | 1.060371000  | 5.519433000  | -1.237506000 |
| H | -0.280721000 | 5.660457000  | 0.861042000  |
| H | -1.175222000 | 3.609679000  | 1.895679000  |
| H | 1.409888000  | 3.301701000  | -2.299938000 |
| H | 1.358572000  | -0.581239000 | -2.650397000 |
| H | -1.365688000 | 1.389386000  | 1.900228000  |
| H | 0.127616000  | -2.088529000 | 2.754717000  |
| H | 2.167570000  | -2.512584000 | 4.094918000  |
| H | 4.118339000  | -0.985515000 | 3.904489000  |
| H | 3.998505000  | 0.968789000  | 2.368296000  |
| H | 1.988654000  | 1.369195000  | 1.016526000  |
| H | 5.500590000  | -1.217321000 | -1.644836000 |
| H | 5.469923000  | 0.555426000  | -1.918272000 |
| H | 5.009643000  | -0.097834000 | -0.331885000 |
| N | -0.221358000 | -2.280424000 | -0.202985000 |
| N | -2.154264000 | -2.300123000 | -1.306417000 |
| N | -2.037819000 | -1.133563000 | -0.532520000 |
| C | -0.833969000 | -1.097933000 | 0.181013000  |
| C | -3.448730000 | 0.874269000  | -0.557995000 |
| C | -4.657345000 | 1.492351000  | -0.258535000 |
| H | 1.785724000  | -4.551889000 | -1.388239000 |
| H | 0.725685000  | -4.918789000 | -0.023656000 |
| H | -0.962757000 | -4.989390000 | -1.720150000 |
| H | -0.095701000 | -3.848487000 | -2.753776000 |
| H | 1.566119000  | -2.852610000 | 0.782497000  |

|   |              |              |              |
|---|--------------|--------------|--------------|
| H | 1.788120000  | -2.167373000 | -0.835520000 |
| C | 1.476171000  | 0.323333000  | -2.061391000 |
| C | 0.385967000  | 0.953932000  | -1.598889000 |
| C | 0.298211000  | 2.216774000  | -0.837042000 |
| C | -0.420228000 | 2.292182000  | 0.375884000  |
| C | -3.256505000 | -0.461704000 | -0.211822000 |
| C | -4.277497000 | -1.185040000 | 0.400190000  |
| C | -5.489898000 | -0.564186000 | 0.685636000  |
| C | -5.678517000 | 0.776436000  | 0.363652000  |
| C | -1.045762000 | -2.913567000 | -1.101918000 |
| C | -0.349380000 | -4.087492000 | -1.716321000 |
| C | 0.913926000  | -4.206789000 | -0.831326000 |
| C | 1.142112000  | -2.805181000 | -0.220558000 |
| N | -0.942380000 | 1.162213000  | 1.008429000  |
| H | -0.573465000 | 0.496994000  | -1.849453000 |
| H | -2.651975000 | 1.422699000  | -1.048758000 |
| H | -4.804685000 | 2.534403000  | -0.522615000 |
| H | -6.622681000 | 1.262105000  | 0.588264000  |
| H | -6.285210000 | -1.128367000 | 1.161892000  |
| H | -4.111340000 | -2.231386000 | 0.634795000  |

### **B-TSa3**

|   |              |             |              |
|---|--------------|-------------|--------------|
| C | 1.051080000  | 4.544668000 | -0.667468000 |
| C | 0.133904000  | 4.776480000 | 0.354703000  |
| C | -0.580110000 | 3.724260000 | 0.929453000  |
| C | 1.262161000  | 3.248547000 | -1.142410000 |
| C | 2.977523000  | 0.341952000 | -1.527101000 |
| C | -0.168816000 | 0.114488000 | 0.573872000  |

|   |              |              |              |
|---|--------------|--------------|--------------|
| O | 3.541583000  | 1.239297000  | -0.896960000 |
| C | 0.847156000  | -0.239145000 | 1.633132000  |
| C | 0.463948000  | -1.074769000 | 2.692945000  |
| C | 1.353287000  | -1.389095000 | 3.715208000  |
| C | 2.643039000  | -0.861396000 | 3.693589000  |
| C | 3.023240000  | -0.016697000 | 2.655565000  |
| C | 2.135169000  | 0.301670000  | 1.628732000  |
| O | 3.740205000  | -0.580628000 | -2.221646000 |
| C | 5.133048000  | -0.337664000 | -2.170010000 |
| H | 1.608738000  | 5.372568000  | -1.092207000 |
| H | -0.020805000 | 5.785957000  | 0.723267000  |
| H | -1.286003000 | 3.899953000  | 1.736076000  |
| H | 1.985923000  | 3.039847000  | -1.922380000 |
| H | 1.337991000  | -0.712850000 | -2.376432000 |
| H | -1.225469000 | 1.302199000  | 1.907732000  |
| H | -0.542056000 | -1.492058000 | 2.710083000  |
| H | 1.040565000  | -2.040476000 | 4.525544000  |
| H | 3.344269000  | -1.106199000 | 4.485376000  |
| H | 4.024923000  | 0.400460000  | 2.629417000  |
| H | 2.463735000  | 0.955333000  | 0.826267000  |
| H | 5.603760000  | -1.139303000 | -2.741545000 |
| H | 5.383435000  | 0.632392000  | -2.609440000 |
| H | 5.499267000  | -0.342481000 | -1.139416000 |
| N | -0.235948000 | -2.207503000 | -0.240857000 |
| N | -2.273646000 | -2.430121000 | -1.060992000 |
| N | -2.108138000 | -1.198661000 | -0.456680000 |
| C | -0.864773000 | -1.045430000 | 0.067483000  |
| C | -3.279479000 | 0.932682000  | -0.869228000 |

|   |              |              |              |
|---|--------------|--------------|--------------|
| C | -4.450758000 | 1.677491000  | -0.791783000 |
| H | 1.617590000  | -4.804375000 | -0.890342000 |
| H | 0.527715000  | -4.846507000 | 0.500724000  |
| H | -1.137194000 | -5.139537000 | -1.205330000 |
| H | -0.204056000 | -4.215796000 | -2.393377000 |
| H | 1.455903000  | -2.700038000 | 0.936638000  |
| H | 1.791564000  | -2.364991000 | -0.776203000 |
| C | 1.596442000  | 0.077293000  | -1.680078000 |
| C | 0.528159000  | 0.766195000  | -1.039970000 |
| C | 0.552125000  | 2.197917000  | -0.582755000 |
| C | -0.350364000 | 2.438918000  | 0.455898000  |
| C | -3.274230000 | -0.363874000 | -0.364748000 |
| C | -4.420520000 | -0.931075000 | 0.182741000  |
| C | -5.588919000 | -0.179117000 | 0.245810000  |
| C | -5.603225000 | 1.126449000  | -0.236248000 |
| C | -1.120439000 | -2.997831000 | -0.917596000 |
| C | -0.479877000 | -4.279716000 | -1.336138000 |
| C | 0.768501000  | -4.308773000 | -0.419824000 |
| C | 1.094601000  | -2.835405000 | -0.081777000 |
| N | -0.980177000 | 1.262581000  | 0.923562000  |
| H | -0.400761000 | 0.612673000  | -1.606048000 |
| H | -2.381766000 | 1.359330000  | -1.299995000 |
| H | -4.459738000 | 2.691841000  | -1.175357000 |
| H | -6.514284000 | 1.713579000  | -0.186201000 |
| H | -6.485821000 | -0.615484000 | 0.672049000  |
| H | -4.387609000 | -1.953598000 | 0.542759000  |

**B-3a**

|   |              |              |              |
|---|--------------|--------------|--------------|
| C | -1.423897000 | -4.489415000 | -0.544894000 |
| C | -0.442547000 | -4.779806000 | 0.399670000  |
| C | 0.396186000  | -3.779682000 | 0.899017000  |
| C | -1.586296000 | -3.185823000 | -1.024943000 |
| C | -3.040889000 | -0.155236000 | -1.462544000 |
| C | 0.121611000  | -0.186788000 | 0.403883000  |
| O | -3.665006000 | -0.975764000 | -0.766975000 |
| C | -0.775548000 | 0.226721000  | 1.564451000  |
| C | -0.206813000 | 0.971714000  | 2.607132000  |
| C | -0.955936000 | 1.324442000  | 3.724070000  |
| C | -2.288767000 | 0.926163000  | 3.811784000  |
| C | -2.851212000 | 0.174820000  | 2.784950000  |
| C | -2.106080000 | -0.181289000 | 1.659814000  |
| O | -3.767710000 | 0.738741000  | -2.249041000 |
| C | -5.164940000 | 0.546437000  | -2.198149000 |
| H | -2.075371000 | -5.279413000 | -0.903504000 |
| H | -0.332644000 | -5.795214000 | 0.767867000  |
| H | 1.154904000  | -4.001045000 | 1.643910000  |
| H | -2.364103000 | -2.928529000 | -1.734870000 |
| H | -1.356993000 | 0.723227000  | -2.386170000 |
| H | 1.228557000  | -1.317736000 | 1.757278000  |
| H | 0.834254000  | 1.289173000  | 2.542078000  |
| H | -0.501722000 | 1.905146000  | 4.520977000  |
| H | -2.881951000 | 1.200670000  | 4.678474000  |
| H | -3.888499000 | -0.139152000 | 2.843596000  |
| H | -2.581438000 | -0.750835000 | 0.862307000  |
| H | -5.556461000 | 0.691558000  | -1.186195000 |
| H | -5.599792000 | 1.284670000  | -2.875573000 |



|   |              |              |              |
|---|--------------|--------------|--------------|
| H | -5.444239000 | -0.462118000 | -2.517793000 |
| N | 0.318647000  | 2.197099000  | -0.292166000 |
| N | 2.412642000  | 2.415963000  | -0.942435000 |
| N | 2.162992000  | 1.148910000  | -0.470564000 |
| C | 0.889022000  | 1.000700000  | -0.059911000 |
| C | 3.216367000  | -0.993586000 | -1.072885000 |
| C | 4.338491000  | -1.813414000 | -1.050816000 |
| H | -1.395604000 | 4.926468000  | -0.751601000 |
| H | -0.390046000 | 4.769650000  | 0.694429000  |
| H | 1.383990000  | 5.173506000  | -0.874968000 |
| H | 0.490973000  | 4.424887000  | -2.208577000 |
| H | -1.425534000 | 2.620159000  | 0.829516000  |
| H | -1.659644000 | 2.482098000  | -0.922349000 |
| C | -1.668115000 | 0.050234000  | -1.594439000 |
| C | -0.609860000 | -0.745104000 | -0.953223000 |
| C | -0.755157000 | -2.193430000 | -0.537511000 |
| C | 0.215164000  | -2.491043000 | 0.420615000  |
| C | 3.279207000  | 0.239502000  | -0.434963000 |
| C | 4.436720000  | 0.677463000  | 0.197478000  |
| C | 5.554559000  | -0.150660000 | 0.207262000  |
| C | 5.504454000  | -1.395616000 | -0.412942000 |
| C | 1.269297000  | 3.017391000  | -0.824093000 |
| C | 0.703812000  | 4.363015000  | -1.136863000 |
| C | -0.595469000 | 4.346289000  | -0.292172000 |
| C | -0.998082000 | 2.861690000  | -0.142797000 |
| N | 0.955589000  | -1.331502000 | 0.779308000  |
| H | 0.246552000  | -0.751321000 | -1.650051000 |
| H | 2.304043000  | -1.312664000 | -1.562062000 |

|   |             |              |              |
|---|-------------|--------------|--------------|
| H | 4.297459000 | -2.781009000 | -1.538597000 |
| H | 6.377008000 | -2.040214000 | -0.403824000 |
| H | 6.462658000 | 0.180160000  | 0.699445000  |
| H | 4.454595000 | 1.656635000  | 0.663501000  |

**B-4a**

|   |              |              |              |
|---|--------------|--------------|--------------|
| C | -0.990616000 | -1.625907000 | -3.968223000 |
| C | -1.230942000 | -0.350651000 | -4.473555000 |
| C | -0.925643000 | 0.792530000  | -3.728585000 |
| C | -0.437167000 | -1.792064000 | -2.692920000 |
| C | 2.048002000  | -2.508390000 | -0.467426000 |
| C | 0.983936000  | 0.986551000  | -0.642530000 |
| O | 2.237720000  | -2.777629000 | -1.657833000 |
| C | 2.407296000  | 1.140773000  | -1.164586000 |
| C | 3.090685000  | 2.339356000  | -0.921130000 |
| C | 4.363851000  | 2.553385000  | -1.439535000 |
| C | 4.966585000  | 1.565693000  | -2.215052000 |
| C | 4.285919000  | 0.379159000  | -2.470256000 |
| C | 3.009577000  | 0.159501000  | -1.954477000 |
| O | 2.759463000  | -3.207794000 | 0.506464000  |
| C | 3.556654000  | -4.259027000 | -0.004562000 |
| H | -1.225761000 | -2.497258000 | -4.569992000 |
| H | -1.655107000 | -0.236317000 | -5.466252000 |
| H | -1.107608000 | 1.786206000  | -4.126480000 |
| H | -0.206159000 | -2.774238000 | -2.294889000 |
| H | 1.239450000  | -1.521125000 | 1.208145000  |
| H | 0.365525000  | 2.462462000  | -1.981190000 |
| H | 2.623349000  | 3.118096000  | -0.317819000 |

|   |              |              |              |
|---|--------------|--------------|--------------|
| H | 4.880496000  | 3.486990000  | -1.240092000 |
| H | 5.961510000  | 1.723210000  | -2.619432000 |
| H | 4.747744000  | -0.396454000 | -3.072632000 |
| H | 2.506622000  | -0.781688000 | -2.158824000 |
| H | 4.295238000  | -3.886262000 | -0.719549000 |
| H | 4.056850000  | -4.708104000 | 0.855396000  |
| H | 2.946060000  | -5.010170000 | -0.514393000 |
| N | 1.801579000  | 1.100888000  | 1.703186000  |
| N | 0.256122000  | 2.239577000  | 2.781227000  |
| N | -0.012458000 | 2.174508000  | 1.435418000  |
| C | 0.921566000  | 1.484578000  | 0.763620000  |
| C | -2.273536000 | 2.265898000  | 0.464737000  |
| C | -3.353381000 | 3.046864000  | 0.061119000  |
| H | 2.604824000  | -0.922878000 | 3.416017000  |
| H | 4.118543000  | -0.044923000 | 3.688996000  |
| H | 2.905815000  | 1.993199000  | 4.312774000  |
| H | 1.736964000  | 0.788909000  | 4.880889000  |
| H | 3.884898000  | 1.130462000  | 1.531123000  |
| H | 3.131626000  | -0.447469000 | 1.129014000  |
| C | 1.174683000  | -1.582036000 | 0.127373000  |
| C | 0.391192000  | -0.520625000 | -0.544233000 |
| C | -0.129831000 | -0.663108000 | -1.954600000 |
| C | -0.372570000 | 0.612331000  | -2.469797000 |
| C | -1.149032000 | 2.920490000  | 0.948686000  |
| C | -1.076590000 | 4.304636000  | 1.052666000  |
| C | -2.164376000 | 5.067251000  | 0.641941000  |
| C | -3.301676000 | 4.436285000  | 0.144837000  |
| C | 1.359553000  | 1.567138000  | 2.906772000  |

|   |              |              |              |
|---|--------------|--------------|--------------|
| C | 2.280986000  | 1.148137000  | 4.006926000  |
| C | 3.105857000  | 0.042687000  | 3.295723000  |
| C | 3.104664000  | 0.411333000  | 1.798933000  |
| N | 0.014966000  | 1.616030000  | -1.543939000 |
| H | -0.521719000 | -0.347989000 | 0.057130000  |
| H | -2.324775000 | 1.179619000  | 0.401883000  |
| H | -4.244844000 | 2.557494000  | -0.317678000 |
| H | -4.153519000 | 5.029312000  | -0.171687000 |
| H | -2.123107000 | 6.148592000  | 0.715437000  |
| H | -0.183087000 | 4.767446000  | 1.459076000  |
| C | -1.096031000 | -1.214801000 | 2.824210000  |
| C | -1.340942000 | -2.657574000 | 2.355586000  |
| H | -0.094504000 | -0.872250000 | 2.538813000  |
| H | -1.838272000 | -0.545024000 | 2.377275000  |
| H | -1.176635000 | -1.144988000 | 3.914225000  |
| C | -2.733520000 | -3.100574000 | 2.792717000  |
| C | -0.267841000 | -3.603479000 | 2.895690000  |
| H | -2.936808000 | -4.105382000 | 2.412017000  |
| H | -2.816137000 | -3.110267000 | 3.883584000  |
| H | -3.479044000 | -2.410756000 | 2.385436000  |
| H | -0.225681000 | -3.563957000 | 3.989018000  |
| H | -0.494082000 | -4.629325000 | 2.591974000  |
| H | 0.718101000  | -3.345566000 | 2.492605000  |
| O | -1.348434000 | -2.731322000 | 0.928611000  |
| H | -0.430722000 | -2.553492000 | 0.588663000  |
| C | -4.158492000 | -2.595085000 | -0.875653000 |
| C | -4.142448000 | -1.091710000 | -0.603975000 |
| H | -3.201367000 | -2.910179000 | -1.304475000 |

|   |              |              |              |
|---|--------------|--------------|--------------|
| H | -4.314284000 | -3.151236000 | 0.054003000  |
| H | -4.955878000 | -2.853296000 | -1.578858000 |
| C | -5.460039000 | -0.637993000 | 0.018581000  |
| C | -3.859416000 | -0.325758000 | -1.895012000 |
| H | -5.403016000 | 0.424058000  | 0.279015000  |
| H | -6.295539000 | -0.782826000 | -0.672972000 |
| H | -5.658659000 | -1.200015000 | 0.935881000  |
| H | -4.654408000 | -0.478494000 | -2.632472000 |
| H | -3.776235000 | 0.746829000  | -1.690003000 |
| H | -2.913680000 | -0.659844000 | -2.327673000 |
| O | -3.122024000 | -0.786124000 | 0.345323000  |
| H | -2.469748000 | -1.519942000 | 0.383153000  |

**B-TSa4**

|   |              |              |              |
|---|--------------|--------------|--------------|
| C | -1.103033000 | -1.057844000 | -4.201876000 |
| C | -1.300788000 | 0.277696000  | -4.541201000 |
| C | -0.957988000 | 1.307086000  | -3.659106000 |
| C | -0.561854000 | -1.402661000 | -2.957909000 |
| C | 2.012860000  | -2.353497000 | -0.757325000 |
| C | 0.921892000  | 1.030530000  | -0.552161000 |
| O | 2.081848000  | -2.631325000 | -1.938764000 |
| C | 2.362859000  | 1.198424000  | -1.031662000 |
| C | 3.111034000  | 2.297916000  | -0.591024000 |
| C | 4.394634000  | 2.531130000  | -1.074621000 |
| C | 4.946577000  | 1.666694000  | -2.016834000 |
| C | 4.199938000  | 0.587381000  | -2.478409000 |
| C | 2.912323000  | 0.354192000  | -1.999783000 |
| O | 2.958416000  | -2.805585000 | 0.123028000  |

|   |              |              |              |
|---|--------------|--------------|--------------|
| C | 3.947061000  | -3.649434000 | -0.456127000 |
| H | -1.368815000 | -1.838662000 | -4.906288000 |
| H | -1.721071000 | 0.529902000  | -5.509713000 |
| H | -1.108279000 | 2.348416000  | -3.926327000 |
| H | -0.380504000 | -2.436556000 | -2.684949000 |
| H | 1.291268000  | -1.395711000 | 0.964238000  |
| H | 0.406283000  | 2.689124000  | -1.713253000 |
| H | 2.687006000  | 2.985172000  | 0.140841000  |
| H | 4.959442000  | 3.387179000  | -0.719048000 |
| H | 5.949441000  | 1.839692000  | -2.393681000 |
| H | 4.614976000  | -0.086723000 | -3.220688000 |
| H | 2.346360000  | -0.486542000 | -2.383816000 |
| H | 3.485149000  | -4.525298000 | -0.916743000 |
| H | 4.509835000  | -3.111458000 | -1.223500000 |
| H | 4.603474000  | -3.949826000 | 0.360051000  |
| N | 1.699834000  | 0.939218000  | 1.831723000  |
| N | 0.111141000  | 1.968240000  | 2.955108000  |
| N | -0.118671000 | 2.014115000  | 1.604110000  |
| C | 0.837074000  | 1.388852000  | 0.904995000  |
| C | -2.401495000 | 2.115944000  | 0.690454000  |
| C | -3.495891000 | 2.905280000  | 0.342752000  |
| H | 2.428169000  | -1.233513000 | 3.374012000  |
| H | 3.937103000  | -0.401153000 | 3.792498000  |
| H | 2.706813000  | 1.578603000  | 4.560857000  |
| H | 1.510168000  | 0.330818000  | 4.958049000  |
| H | 3.787328000  | 0.996748000  | 1.760682000  |
| H | 3.094902000  | -0.537380000 | 1.170610000  |
| C | 0.965265000  | -1.613075000 | -0.052833000 |

|   |              |              |              |
|---|--------------|--------------|--------------|
| C | 0.269892000  | -0.414398000 | -0.657910000 |
| C | -0.222139000 | -0.387459000 | -2.082353000 |
| C | -0.414470000 | 0.950526000  | -2.435472000 |
| C | -1.267622000 | 2.768849000  | 1.153156000  |
| C | -1.191653000 | 4.150224000  | 1.284553000  |
| C | -2.292942000 | 4.918215000  | 0.923892000  |
| C | -3.444958000 | 4.292554000  | 0.453825000  |
| C | 1.215714000  | 1.295093000  | 3.058115000  |
| C | 2.092646000  | 0.771766000  | 4.148639000  |
| C | 2.941702000  | -0.266896000 | 3.369367000  |
| C | 3.003492000  | 0.250139000  | 1.918359000  |
| N | 0.005484000  | 1.814323000  | -1.390417000 |
| H | -0.661257000 | -0.313421000 | -0.074607000 |
| H | -2.447556000 | 1.027874000  | 0.594349000  |
| H | -4.399555000 | 2.421987000  | -0.013666000 |
| H | -4.308859000 | 4.888730000  | 0.178546000  |
| H | -2.252100000 | 5.998033000  | 1.017807000  |
| H | -0.286877000 | 4.606755000  | 1.673263000  |
| C | -1.023384000 | -1.449418000 | 2.794567000  |
| C | -1.197779000 | -2.847704000 | 2.161979000  |
| H | -0.064013000 | -1.014824000 | 2.484757000  |
| H | -1.826233000 | -0.788088000 | 2.450825000  |
| H | -1.039244000 | -1.485938000 | 3.890691000  |
| C | -2.525930000 | -3.439845000 | 2.649829000  |
| C | -0.037151000 | -3.757923000 | 2.590242000  |
| H | -2.674676000 | -4.421315000 | 2.189835000  |
| H | -2.559029000 | -3.549740000 | 3.740126000  |
| H | -3.345892000 | -2.785090000 | 2.336752000  |

|   |              |              |              |
|---|--------------|--------------|--------------|
| H | 0.020805000  | -3.863655000 | 3.680078000  |
| H | -0.173133000 | -4.749240000 | 2.148282000  |
| H | 0.918869000  | -3.362704000 | 2.225128000  |
| O | -1.238256000 | -2.764850000 | 0.766696000  |
| H | -0.011815000 | -2.347105000 | 0.242797000  |
| C | -3.709747000 | -2.704197000 | -1.198071000 |
| C | -3.910916000 | -1.288509000 | -0.653449000 |
| H | -2.799186000 | -2.742573000 | -1.803605000 |
| H | -3.589407000 | -3.415601000 | -0.376095000 |
| H | -4.559650000 | -3.006586000 | -1.818454000 |
| C | -5.197742000 | -1.217661000 | 0.174918000  |
| C | -3.982808000 | -0.291559000 | -1.811754000 |
| H | -5.299009000 | -0.219154000 | 0.613784000  |
| H | -6.084335000 | -1.423794000 | -0.434457000 |
| H | -5.161091000 | -1.944664000 | 0.991870000  |
| H | -4.833550000 | -0.504649000 | -2.468101000 |
| H | -4.092782000 | 0.728038000  | -1.427447000 |
| H | -3.063813000 | -0.331596000 | -2.402348000 |
| O | -2.825061000 | -0.922970000 | 0.176159000  |
| H | -2.213783000 | -1.736419000 | 0.396875000  |

**B-5a**

|   |              |              |              |
|---|--------------|--------------|--------------|
| C | -3.503454000 | 1.597572000  | 3.274768000  |
| C | -4.250827000 | 2.212534000  | 2.275897000  |
| C | -3.891267000 | 2.100594000  | 0.928542000  |
| C | -2.359487000 | 0.856724000  | 2.951598000  |
| C | -0.666270000 | -2.211892000 | 2.079585000  |
| C | -1.336822000 | -0.080060000 | -0.508650000 |



|   |              |              |              |
|---|--------------|--------------|--------------|
| O | -1.439204000 | -2.302111000 | 3.004466000  |
| C | -2.181539000 | -1.326226000 | -0.812308000 |
| C | -2.338405000 | -1.754436000 | -2.137027000 |
| C | -3.202401000 | -2.796446000 | -2.458661000 |
| C | -3.943540000 | -3.419391000 | -1.458906000 |
| C | -3.821343000 | -2.979380000 | -0.144596000 |
| C | -2.953334000 | -1.939047000 | 0.179876000  |
| O | -0.318164000 | -3.273108000 | 1.321789000  |
| C | -0.948111000 | -4.500320000 | 1.684875000  |
| H | -3.810753000 | 1.686634000  | 4.311085000  |
| H | -5.136508000 | 2.781261000  | 2.540701000  |
| H | -4.480323000 | 2.574112000  | 0.149417000  |
| H | -1.785991000 | 0.348043000  | 3.720247000  |
| H | 0.901771000  | -1.165685000 | 1.023038000  |
| H | -2.885530000 | 1.017430000  | -1.395792000 |
| H | -1.776992000 | -1.274261000 | -2.936051000 |
| H | -3.298112000 | -3.116653000 | -3.491241000 |
| H | -4.617497000 | -4.233521000 | -1.704494000 |
| H | -4.408077000 | -3.442195000 | 0.643018000  |
| H | -2.892690000 | -1.605137000 | 1.209166000  |
| H | -2.029975000 | -4.421608000 | 1.551067000  |
| H | -0.536380000 | -5.257256000 | 1.018926000  |
| H | -0.735779000 | -4.744295000 | 2.727425000  |
| N | 0.624349000  | -1.028726000 | -1.819809000 |
| N | 1.355225000  | 0.712171000  | -2.951776000 |
| N | 0.284712000  | 1.035629000  | -2.165503000 |
| C | -0.166990000 | -0.009569000 | -1.462956000 |
| C | 0.447732000  | 3.158110000  | -1.041779000 |

|   |              |              |              |
|---|--------------|--------------|--------------|
| C | 0.140301000  | 4.514344000  | -0.974390000 |
| H | 2.414146000  | -3.688499000 | -2.382294000 |
| H | 1.106125000  | -3.238407000 | -3.488579000 |
| H | 2.729849000  | -1.588220000 | -4.183094000 |
| H | 3.409025000  | -1.458977000 | -2.531146000 |
| H | -0.095760000 | -2.979332000 | -1.409742000 |
| H | 1.389081000  | -2.472034000 | -0.538369000 |
| C | 0.027478000  | -0.953110000 | 1.641905000  |
| C | -0.801149000 | 0.128288000  | 0.950518000  |
| C | -1.995771000 | 0.748703000  | 1.622080000  |
| C | -2.760853000 | 1.360366000  | 0.624513000  |
| C | -0.085742000 | 2.426769000  | -2.089736000 |
| C | -0.874950000 | 2.983993000  | -3.084681000 |
| C | -1.170135000 | 4.340543000  | -3.001915000 |
| C | -0.667502000 | 5.100671000  | -1.946536000 |
| C | 1.542358000  | -0.547998000 | -2.707645000 |
| C | 2.499866000  | -1.609748000 | -3.117946000 |
| C | 1.739485000  | -2.881881000 | -2.670461000 |
| C | 0.850671000  | -2.445512000 | -1.486124000 |
| N | -2.202684000 | 1.107542000  | -0.650300000 |
| H | -0.033097000 | 0.919608000  | 0.854293000  |
| H | 1.079790000  | 2.633319000  | -0.318075000 |
| H | 0.537739000  | 5.110854000  | -0.158753000 |
| H | -0.902595000 | 6.158530000  | -1.888000000 |
| H | -1.788948000 | 4.804994000  | -3.762390000 |
| H | -1.245056000 | 2.368827000  | -3.898735000 |
| C | 4.444548000  | -2.581956000 | -0.261929000 |
| C | 3.971688000  | -1.361509000 | 0.528917000  |

|   |             |              |              |
|---|-------------|--------------|--------------|
| H | 3.608656000 | -3.266444000 | -0.446136000 |
| H | 4.877518000 | -2.284468000 | -1.223047000 |
| H | 5.211210000 | -3.131041000 | 0.293896000  |
| C | 5.141074000 | -0.387240000 | 0.697934000  |
| C | 3.439158000 | -1.824304000 | 1.890178000  |
| H | 4.802027000 | 0.509865000  | 1.220466000  |
| H | 5.968363000 | -0.833104000 | 1.260118000  |
| H | 5.507169000 | -0.082076000 | -0.287244000 |
| H | 4.231981000 | -2.240498000 | 2.520731000  |
| H | 2.979807000 | -0.977760000 | 2.404773000  |
| H | 2.670660000 | -2.594967000 | 1.747951000  |
| O | 2.936565000 | -0.730574000 | -0.196855000 |
| H | 0.427407000 | -0.476606000 | 2.543716000  |
| C | 2.934158000 | 1.518629000  | 3.211871000  |
| C | 2.279987000 | 2.151380000  | 1.966934000  |
| H | 2.259332000 | 0.770396000  | 3.644227000  |
| H | 3.876815000 | 1.022491000  | 2.964074000  |
| H | 3.142789000 | 2.269979000  | 3.982300000  |
| C | 3.255920000 | 3.190865000  | 1.381151000  |
| C | 1.012638000 | 2.878096000  | 2.465663000  |
| H | 2.787737000 | 3.728115000  | 0.548781000  |
| H | 3.578561000 | 3.928628000  | 2.125218000  |
| H | 4.142800000 | 2.684447000  | 0.986834000  |
| H | 1.243383000 | 3.649232000  | 3.209811000  |
| H | 0.476028000 | 3.353598000  | 1.637922000  |
| H | 0.327202000 | 2.155506000  | 2.925814000  |
| O | 1.928739000 | 1.208988000  | 1.009696000  |
| H | 2.635384000 | 0.136396000  | 0.333742000  |

**B-TSa5**

|   |              |              |              |
|---|--------------|--------------|--------------|
| C | -3.385213000 | -1.086906000 | -3.396175000 |
| C | -4.197770000 | -1.648475000 | -2.420802000 |
| C | -3.862848000 | -1.533576000 | -1.062753000 |
| C | -2.203749000 | -0.414085000 | -3.049616000 |
| C | -0.255646000 | 2.546867000  | -2.029958000 |
| C | -1.130596000 | 0.414386000  | 0.427128000  |
| O | -1.035767000 | 2.829384000  | -2.907834000 |
| C | -1.760071000 | 1.778456000  | 0.782899000  |
| C | -1.689176000 | 2.322062000  | 2.069611000  |
| C | -2.377204000 | 3.489986000  | 2.395599000  |
| C | -3.170832000 | 4.119715000  | 1.444270000  |
| C | -3.275821000 | 3.567774000  | 0.168655000  |
| C | -2.578842000 | 2.410411000  | -0.161576000 |
| O | 0.231968000  | 3.474437000  | -1.172434000 |
| C | -0.261030000 | 4.796317000  | -1.377926000 |
| H | -3.670849000 | -1.156144000 | -4.440941000 |
| H | -5.109659000 | -2.164284000 | -2.703201000 |
| H | -4.501707000 | -1.950070000 | -0.289512000 |
| H | -1.598597000 | 0.063643000  | -3.814879000 |
| H | 1.243118000  | 1.229263000  | -1.226149000 |
| H | -2.866934000 | -0.412267000 | 1.262109000  |
| H | -1.094072000 | 1.837462000  | 2.840833000  |
| H | -2.296902000 | 3.898730000  | 3.398103000  |
| H | -3.711626000 | 5.026281000  | 1.695760000  |
| H | -3.903463000 | 4.040067000  | -0.580980000 |
| H | -2.672041000 | 1.994034000  | -1.158917000 |

|   |              |              |              |
|---|--------------|--------------|--------------|
| H | -1.342537000 | 4.823348000  | -1.228497000 |
| H | 0.240385000  | 5.422629000  | -0.640538000 |
| H | -0.033337000 | 5.135191000  | -2.390824000 |
| N | 1.025619000  | 0.905540000  | 1.696623000  |
| N | 1.292392000  | -0.879435000 | 2.956393000  |
| N | 0.162997000  | -0.967984000 | 2.187620000  |
| C | -0.009509000 | 0.105464000  | 1.401818000  |
| C | -0.584960000 | -3.092360000 | 1.287713000  |
| C | -1.332566000 | -4.255142000 | 1.421754000  |
| H | 3.435501000  | 3.049235000  | 2.096515000  |
| H | 2.098582000  | 3.025416000  | 3.257607000  |
| H | 3.232117000  | 1.047405000  | 4.034102000  |
| H | 3.842987000  | 0.661926000  | 2.404404000  |
| H | 0.777313000  | 2.956182000  | 1.235869000  |
| H | 2.073730000  | 2.098909000  | 0.351622000  |
| C | 0.282619000  | 1.167706000  | -1.744529000 |
| C | -0.630942000 | 0.177663000  | -1.031523000 |
| C | -1.840883000 | -0.324805000 | -1.711652000 |
| C | -2.701692000 | -0.861107000 | -0.737882000 |
| C | -0.623827000 | -2.168377000 | 2.319029000  |
| C | -1.339668000 | -2.373051000 | 3.488665000  |
| C | -2.074908000 | -3.549551000 | 3.613393000  |
| C | -2.076485000 | -4.482377000 | 2.579592000  |
| C | 1.797038000  | 0.266522000  | 2.622465000  |
| C | 3.000212000  | 1.069083000  | 2.969324000  |
| C | 2.583614000  | 2.467552000  | 2.451386000  |
| C | 1.573344000  | 2.216834000  | 1.310432000  |
| N | -2.174962000 | -0.616402000 | 0.549338000  |

|   |              |              |              |
|---|--------------|--------------|--------------|
| H | 0.258665000  | -0.894273000 | -1.010335000 |
| H | 0.017915000  | -2.854896000 | 0.414299000  |
| H | -1.337352000 | -4.984107000 | 0.617593000  |
| H | -2.657060000 | -5.394010000 | 2.678284000  |
| H | -2.645424000 | -3.734807000 | 4.517301000  |
| H | -1.318984000 | -1.628696000 | 4.278234000  |
| C | 5.198973000  | -1.003874000 | -0.166136000 |
| C | 4.313376000  | 0.140094000  | -0.664647000 |
| H | 5.296726000  | -0.955397000 | 0.923151000  |
| H | 4.746589000  | -1.966862000 | -0.421009000 |
| H | 6.199445000  | -0.960095000 | -0.608264000 |
| C | 4.194174000  | 0.105117000  | -2.187966000 |
| C | 4.895165000  | 1.487088000  | -0.238511000 |
| H | 3.504541000  | 0.884062000  | -2.529488000 |
| H | 5.167102000  | 0.265314000  | -2.662691000 |
| H | 3.808874000  | -0.861034000 | -2.519729000 |
| H | 5.887360000  | 1.636836000  | -0.673767000 |
| H | 4.245475000  | 2.302273000  | -0.575502000 |
| H | 4.994134000  | 1.545609000  | 0.850380000  |
| O | 3.031996000  | 0.042523000  | -0.062141000 |
| H | 0.494800000  | 0.724952000  | -2.724803000 |
| C | 1.176928000  | -1.875020000 | -3.406365000 |
| C | 1.215565000  | -2.613054000 | -2.060813000 |
| H | 0.199228000  | -1.401543000 | -3.542198000 |
| H | 1.947172000  | -1.099828000 | -3.444848000 |
| H | 1.334653000  | -2.563522000 | -4.243480000 |
| C | 2.487213000  | -3.460213000 | -1.957720000 |
| C | -0.003835000 | -3.550284000 | -2.003138000 |

|   |              |              |              |
|---|--------------|--------------|--------------|
| H | 2.545455000  | -3.907188000 | -0.960185000 |
| H | 2.496778000  | -4.262603000 | -2.703494000 |
| H | 3.381898000  | -2.848408000 | -2.109531000 |
| H | -0.082502000 | -4.138823000 | -2.923427000 |
| H | 0.083655000  | -4.254830000 | -1.169084000 |
| H | -0.928503000 | -2.972412000 | -1.886919000 |
| O | 1.206474000  | -1.700743000 | -0.982827000 |
| H | 2.496746000  | -0.700557000 | -0.465154000 |

### **B-6a**

|   |              |              |              |
|---|--------------|--------------|--------------|
| C | -2.340151000 | 3.954238000  | -0.899586000 |
| C | -2.978385000 | 3.723414000  | 0.313348000  |
| C | -2.575139000 | 2.639413000  | 1.118019000  |
| C | -1.296075000 | 3.137683000  | -1.349649000 |
| C | 2.279605000  | 1.592719000  | -1.828109000 |
| C | 0.130457000  | 0.197791000  | 0.511358000  |
| O | 2.470562000  | 2.778229000  | -1.938045000 |
| C | 1.370693000  | 0.234666000  | 1.422637000  |
| C | 1.591428000  | -0.769012000 | 2.369719000  |
| C | 2.663088000  | -0.686942000 | 3.255438000  |
| C | 3.517802000  | 0.412022000  | 3.207394000  |
| C | 3.284743000  | 1.428713000  | 2.283548000  |
| C | 2.214755000  | 1.343497000  | 1.396144000  |
| O | 3.273057000  | 0.733564000  | -1.473929000 |
| C | 4.520992000  | 1.354745000  | -1.179395000 |
| H | -2.646744000 | 4.798180000  | -1.511363000 |
| H | -3.780784000 | 4.372824000  | 0.645764000  |
| H | -3.072750000 | 2.425610000  | 2.060170000  |

|   |              |              |              |
|---|--------------|--------------|--------------|
| H | -0.780877000 | 3.367930000  | -2.277504000 |
| H | 1.122362000  | -0.160863000 | -2.241580000 |
| H | -0.901157000 | 0.684931000  | 2.266138000  |
| H | 0.920917000  | -1.627340000 | 2.409334000  |
| H | 2.827478000  | -1.474327000 | 3.984705000  |
| H | 4.354270000  | 0.480912000  | 3.895544000  |
| H | 3.936437000  | 2.297128000  | 2.258465000  |
| H | 2.009018000  | 2.142053000  | 0.686353000  |
| H | 4.394212000  | 2.114563000  | -0.405172000 |
| H | 5.178896000  | 0.560551000  | -0.827325000 |
| H | 4.932919000  | 1.829750000  | -2.072745000 |
| N | 0.850646000  | -2.043665000 | -0.490575000 |
| N | -1.053618000 | -3.086942000 | -0.874564000 |
| N | -1.261334000 | -1.882418000 | -0.239994000 |
| C | -0.105251000 | -1.220557000 | 0.004906000  |
| C | -3.127504000 | -0.351406000 | -0.637154000 |
| C | -4.464947000 | -0.023634000 | -0.442369000 |
| H | 3.412071000  | -3.778115000 | -1.509349000 |
| H | 2.660874000  | -4.171784000 | 0.041184000  |
| H | 0.981761000  | -5.139628000 | -1.376373000 |
| H | 1.275112000  | -3.968043000 | -2.671507000 |
| H | 2.772224000  | -1.816770000 | 0.370974000  |
| H | 2.677659000  | -1.452776000 | -1.356349000 |
| C | 0.945492000  | 0.887720000  | -1.961573000 |
| C | 0.101955000  | 1.045426000  | -0.735428000 |
| C | -0.878950000 | 2.056153000  | -0.559897000 |
| C | -1.545503000 | 1.844177000  | 0.673954000  |
| C | -2.625753000 | -1.491331000 | -0.022425000 |



|   |              |              |              |
|---|--------------|--------------|--------------|
| C | -3.432573000 | -2.333307000 | 0.735684000  |
| C | -4.771694000 | -2.003625000 | 0.906234000  |
| C | -5.285780000 | -0.845026000 | 0.326086000  |
| C | 0.230151000  | -3.147307000 | -1.010983000 |
| C | 1.226996000  | -4.098472000 | -1.585731000 |
| C | 2.526829000  | -3.619957000 | -0.892850000 |
| C | 2.320026000  | -2.121327000 | -0.572625000 |
| N | -1.043891000 | 0.657277000  | 1.264437000  |
| H | -2.474984000 | 0.275404000  | -1.234648000 |
| H | -4.852953000 | 0.887344000  | -0.885437000 |
| H | -6.328363000 | -0.583560000 | 0.474762000  |
| H | -5.411652000 | -2.648016000 | 1.499792000  |
| H | -3.008393000 | -3.228510000 | 1.177615000  |
| H | 0.427035000  | 1.365576000  | -2.800957000 |

### **B-TSa6**

|   |              |              |              |
|---|--------------|--------------|--------------|
| C | -2.940904000 | 2.636794000  | -1.942923000 |
| C | -3.547215000 | 2.741559000  | -0.691142000 |
| C | -2.886135000 | 2.274618000  | 0.451954000  |
| C | -1.672253000 | 2.077009000  | -2.092121000 |
| C | 2.589248000  | 1.316606000  | -1.746758000 |
| C | 0.284326000  | 0.460478000  | 0.616132000  |
| O | 2.819822000  | 2.495708000  | -1.842173000 |
| C | 1.525100000  | 0.472802000  | 1.485690000  |
| C | 1.688658000  | -0.468760000 | 2.503219000  |
| C | 2.781585000  | -0.401287000 | 3.362950000  |
| C | 3.717865000  | 0.619269000  | 3.216672000  |
| C | 3.546464000  | 1.576066000  | 2.218647000  |

|   |              |              |              |
|---|--------------|--------------|--------------|
| C | 2.452005000  | 1.508911000  | 1.359480000  |
| O | 3.561904000  | 0.413341000  | -1.476809000 |
| C | 4.854823000  | 0.975864000  | -1.261751000 |
| H | -3.467560000 | 2.995832000  | -2.822355000 |
| H | -4.538495000 | 3.173066000  | -0.600703000 |
| H | -3.355823000 | 2.312087000  | 1.430465000  |
| H | -1.219923000 | 2.015298000  | -3.078104000 |
| H | 1.370773000  | -0.414818000 | -2.044893000 |
| H | -0.573544000 | 1.665661000  | 2.084981000  |
| H | 0.947303000  | -1.257532000 | 2.615373000  |
| H | 2.898432000  | -1.139604000 | 4.150127000  |
| H | 4.571478000  | 0.674602000  | 3.884794000  |
| H | 4.263326000  | 2.384909000  | 2.112664000  |
| H | 2.299820000  | 2.263465000  | 0.592149000  |
| H | 4.836281000  | 1.638601000  | -0.393173000 |
| H | 5.523697000  | 0.135115000  | -1.083224000 |
| H | 5.172796000  | 1.546745000  | -2.136129000 |
| N | 0.731289000  | -1.928375000 | -0.330308000 |
| N | -1.257023000 | -2.478551000 | -1.123675000 |
| N | -1.349222000 | -1.492428000 | -0.151401000 |
| C | -0.127055000 | -1.070310000 | 0.293658000  |
| C | -3.681082000 | -0.976428000 | -0.573931000 |
| C | -4.947318000 | -0.658454000 | -0.098069000 |
| H | 3.103773000  | -3.703648000 | -1.629767000 |
| H | 2.135006000  | -4.454994000 | -0.359826000 |
| H | 0.501189000  | -4.613665000 | -2.098847000 |
| H | 1.126222000  | -3.183302000 | -2.936917000 |
| H | 2.439690000  | -2.423688000 | 0.797957000  |

|   |              |              |              |
|---|--------------|--------------|--------------|
| H | 2.767765000  | -1.495711000 | -0.676149000 |
| C | 1.224666000  | 0.664701000  | -1.879433000 |
| C | 0.285151000  | 0.992960000  | -0.764186000 |
| C | -0.990492000 | 1.609587000  | -0.960168000 |
| C | -1.632675000 | 1.721244000  | 0.296079000  |
| C | -2.640853000 | -1.152160000 | 0.334449000  |
| C | -2.853480000 | -1.032923000 | 1.706476000  |
| C | -4.120286000 | -0.697947000 | 2.166716000  |
| C | -5.170212000 | -0.511847000 | 1.268844000  |
| C | 0.011176000  | -2.711740000 | -1.191555000 |
| C | 0.920474000  | -3.618124000 | -1.953000000 |
| C | 2.183572000  | -3.611097000 | -1.052229000 |
| C | 2.148635000  | -2.285808000 | -0.245730000 |
| N | -0.834575000 | 1.103020000  | 1.285019000  |
| H | -3.478960000 | -1.067060000 | -1.635101000 |
| H | -5.757779000 | -0.506640000 | -0.803108000 |
| H | -6.158479000 | -0.253270000 | 1.634501000  |
| H | -4.291277000 | -0.593833000 | 3.233474000  |
| H | -2.023436000 | -1.179851000 | 2.388669000  |
| H | 0.797906000  | 1.074691000  | -2.800269000 |

## 6) Cartesian coordinates of the optimized species in pathway B-b

### **B-TSb1-Si**

|   |             |              |              |
|---|-------------|--------------|--------------|
| C | 3.270824000 | -2.419964000 | -1.692000000 |
| C | 2.198724000 | -3.273527000 | -1.939534000 |
| C | 0.904761000 | -2.768499000 | -1.957270000 |

|   |              |              |              |
|---|--------------|--------------|--------------|
| C | 0.679284000  | -1.410431000 | -1.719566000 |
| C | 1.758907000  | -0.537711000 | -1.468083000 |
| C | 3.050212000  | -1.063961000 | -1.469961000 |
| C | 1.490206000  | 0.924875000  | -1.303084000 |
| N | -0.614617000 | -0.853841000 | -1.715065000 |
| C | 2.439103000  | 1.920864000  | -1.076666000 |
| C | 3.416378000  | 1.810542000  | -0.040863000 |
| C | -1.554774000 | -1.471639000 | -1.118825000 |
| O | 3.575550000  | 0.869844000  | 0.734356000  |
| C | -2.879541000 | -0.851768000 | -0.943225000 |
| C | -3.165580000 | 0.399793000  | -1.503214000 |
| C | -4.394645000 | 1.001744000  | -1.267823000 |
| C | -5.343919000 | 0.370537000  | -0.460788000 |
| C | -5.063186000 | -0.871477000 | 0.100249000  |
| C | -3.836115000 | -1.481987000 | -0.144746000 |
| O | 4.190108000  | 2.931628000  | 0.066565000  |
| C | 5.149811000  | 2.889683000  | 1.108632000  |
| H | 4.284807000  | -2.806551000 | -1.686611000 |
| H | 2.370105000  | -4.327910000 | -2.132125000 |
| H | 0.061078000  | -3.412912000 | -2.185981000 |
| H | 3.882744000  | -0.399071000 | -1.277856000 |
| H | 2.273383000  | 2.908696000  | -1.489859000 |
| H | 0.691357000  | 1.219836000  | -1.987556000 |
| H | -1.394166000 | -2.439486000 | -0.623524000 |
| H | -2.409531000 | 0.871561000  | -2.124863000 |
| H | -4.625741000 | 1.960896000  | -1.722842000 |
| H | -6.303178000 | 0.844668000  | -0.278617000 |
| H | -5.799367000 | -1.364998000 | 0.726183000  |
| H | -3.608756000 | -2.451532000 | 0.292160000  |
| H | 5.859010000  | 2.071163000  | 0.958018000  |
| H | 5.669658000  | 3.847716000  | 1.078650000  |
| H | 4.670336000  | 2.748015000  | 2.080911000  |
| C | -2.157220000 | 3.734816000  | -0.093001000 |
| C | -2.525319000 | 3.042608000  | 1.248368000  |
| C | -1.621577000 | 1.853925000  | 1.228049000  |
| N | -0.659397000 | 1.984831000  | 0.264334000  |
| C | -0.737801000 | 3.242420000  | -0.469084000 |
| N | -1.488846000 | 0.738587000  | 1.872289000  |
| N | -0.385100000 | 0.174094000  | 1.259167000  |
| C | 0.140542000  | 0.899234000  | 0.251545000  |
| C | 0.037739000  | -1.132384000 | 1.636758000  |
| C | 1.380843000  | -1.471289000 | 1.497880000  |
| C | 1.763714000  | -2.780904000 | 1.772902000  |
| C | 0.829371000  | -3.717478000 | 2.207752000  |
| C | -0.502247000 | -3.344765000 | 2.381392000  |

|   |              |              |              |
|---|--------------|--------------|--------------|
| C | -0.909911000 | -2.046700000 | 2.091815000  |
| H | -2.205037000 | 4.822184000  | -0.028263000 |
| H | -2.859755000 | 3.408519000  | -0.863199000 |
| H | -3.576599000 | 2.753808000  | 1.295981000  |
| H | -2.299888000 | 3.675083000  | 2.112128000  |
| H | -0.615949000 | 3.075085000  | -1.540786000 |
| H | 0.055949000  | 3.912041000  | -0.127325000 |
| H | 2.104747000  | -0.720358000 | 1.187174000  |
| H | 2.804989000  | -3.060349000 | 1.651653000  |
| H | 1.139162000  | -4.734666000 | 2.424781000  |
| H | -1.228932000 | -4.067509000 | 2.738603000  |
| H | -1.941468000 | -1.730755000 | 2.205056000  |

**B-TSb1-Re**

|   |              |              |              |
|---|--------------|--------------|--------------|
| C | 3.416217000  | -1.513251000 | 2.257650000  |
| C | 2.616679000  | -2.653582000 | 2.275132000  |
| C | 1.271945000  | -2.558690000 | 1.944260000  |
| C | 0.718990000  | -1.323133000 | 1.606874000  |
| C | 1.523297000  | -0.165748000 | 1.547635000  |
| C | 2.869504000  | -0.286898000 | 1.899813000  |
| C | 0.926192000  | 1.159178000  | 1.185213000  |
| N | -0.630470000 | -1.289325000 | 1.192256000  |
| C | 1.605428000  | 2.364336000  | 1.024125000  |
| C | 2.817602000  | 2.492849000  | 0.274843000  |
| C | -1.528218000 | -0.775309000 | 1.926945000  |
| O | 3.441251000  | 1.607451000  | -0.303601000 |
| C | -2.912387000 | -0.624328000 | 1.429539000  |
| C | -3.259091000 | -1.090853000 | 0.154552000  |
| C | -4.554051000 | -0.924969000 | -0.318194000 |
| C | -5.513149000 | -0.285315000 | 0.471460000  |
| C | -5.170191000 | 0.191154000  | 1.734185000  |
| C | -3.872001000 | 0.020818000  | 2.211842000  |
| O | 3.246305000  | 3.788672000  | 0.214910000  |
| C | 4.423183000  | 3.983871000  | -0.551198000 |
| H | 4.467310000  | -1.577417000 | 2.519058000  |
| H | 3.038614000  | -3.617363000 | 2.542415000  |
| H | 0.631929000  | -3.434653000 | 1.932261000  |
| H | 3.491405000  | 0.598316000  | 1.870207000  |
| H | 1.082780000  | 3.285942000  | 1.250714000  |
| H | -0.042346000 | 1.295988000  | 1.669656000  |
| H | -1.315594000 | -0.385193000 | 2.933946000  |
| H | -2.493082000 | -1.576843000 | -0.443909000 |
| H | -4.821325000 | -1.297860000 | -1.302391000 |
| H | -6.525589000 | -0.159959000 | 0.100740000  |
| H | -5.912863000 | 0.689374000  | 2.348778000  |

|   |              |              |              |
|---|--------------|--------------|--------------|
| H | -3.600541000 | 0.384666000  | 3.199968000  |
| H | 4.622611000  | 5.055521000  | -0.530526000 |
| H | 5.266302000  | 3.434859000  | -0.122881000 |
| H | 4.283818000  | 3.641890000  | -1.580158000 |
| C | -3.208913000 | 2.460721000  | -0.868042000 |
| C | -2.983339000 | 1.760750000  | -2.236064000 |
| C | -1.756466000 | 0.956168000  | -1.955269000 |
| N | -1.142003000 | 1.390448000  | -0.812655000 |
| C | -1.828677000 | 2.504615000  | -0.169785000 |
| N | -1.119479000 | -0.045991000 | -2.474584000 |
| N | -0.065344000 | -0.216484000 | -1.594431000 |
| C | -0.057737000 | 0.632898000  | -0.551637000 |
| C | 0.815967000  | -1.328134000 | -1.748220000 |
| C | 0.307146000  | -2.534434000 | -2.219402000 |
| C | 1.156323000  | -3.632001000 | -2.305019000 |
| C | 2.487860000  | -3.521169000 | -1.910482000 |
| C | 2.977861000  | -2.302220000 | -1.448538000 |
| C | 2.148920000  | -1.186822000 | -1.375595000 |
| H | -3.886790000 | 1.852395000  | -0.262726000 |
| H | -3.641789000 | 3.455791000  | -0.975403000 |
| H | -2.791317000 | 2.479456000  | -3.038670000 |
| H | -3.828533000 | 1.135865000  | -2.528395000 |
| H | -1.275986000 | 3.430230000  | -0.353098000 |
| H | -1.903723000 | 2.341993000  | 0.907556000  |
| H | -0.735657000 | -2.598606000 | -2.509229000 |
| H | 0.772161000  | -4.578623000 | -2.670928000 |
| H | 3.143275000  | -4.384302000 | -1.967557000 |
| H | 4.014907000  | -2.206507000 | -1.144530000 |
| H | 2.527279000  | -0.227484000 | -1.029208000 |

**B-1b-Si**

|   |              |              |              |
|---|--------------|--------------|--------------|
| C | 3.064206000  | -2.940133000 | -2.031610000 |
| C | 1.960419000  | -3.761851000 | -2.239018000 |
| C | 0.677937000  | -3.267446000 | -2.025030000 |
| C | 0.500060000  | -1.944708000 | -1.606575000 |
| C | 1.611028000  | -1.100398000 | -1.431927000 |
| C | 2.885394000  | -1.617078000 | -1.631212000 |
| C | 1.409943000  | 0.362058000  | -1.005649000 |
| N | -0.777333000 | -1.403959000 | -1.343859000 |
| C | 2.629126000  | 1.215514000  | -0.829050000 |
| C | 3.466999000  | 1.019130000  | 0.261576000  |
| C | -1.614909000 | -2.103122000 | -0.685393000 |
| O | 3.328739000  | 0.191734000  | 1.189979000  |
| C | -2.954727000 | -1.605649000 | -0.339537000 |
| C | -3.387114000 | -0.345728000 | -0.769503000 |

|   |              |              |              |
|---|--------------|--------------|--------------|
| C | -4.646770000 | 0.112878000  | -0.409978000 |
| C | -5.484218000 | -0.677467000 | 0.379772000  |
| C | -5.058425000 | -1.931186000 | 0.809564000  |
| C | -3.796609000 | -2.393332000 | 0.449751000  |
| O | 4.560526000  | 1.863957000  | 0.276068000  |
| C | 5.421693000  | 1.686867000  | 1.380457000  |
| H | 4.066123000  | -3.326031000 | -2.189183000 |
| H | 2.093710000  | -4.785593000 | -2.574286000 |
| H | -0.193924000 | -3.887000000 | -2.215202000 |
| H | 3.727399000  | -0.951262000 | -1.469703000 |
| H | 2.888486000  | 1.925589000  | -1.601643000 |
| H | 0.765274000  | 0.818995000  | -1.769884000 |
| H | -1.359850000 | -3.109271000 | -0.315648000 |
| H | -2.719097000 | 0.256404000  | -1.378503000 |
| H | -4.979288000 | 1.090484000  | -0.746358000 |
| H | -6.468275000 | -0.314641000 | 0.658762000  |
| H | -5.707794000 | -2.547099000 | 1.422934000  |
| H | -3.458116000 | -3.372184000 | 0.780856000  |
| H | 6.223683000  | 2.417321000  | 1.259072000  |
| H | 4.901918000  | 1.858512000  | 2.328182000  |
| H | 5.839911000  | 0.675692000  | 1.408019000  |
| N | 0.594831000  | -0.501063000 | 1.241854000  |
| N | -0.942995000 | 0.961069000  | 1.824879000  |
| N | -0.368129000 | 1.280095000  | 0.619464000  |
| C | 0.576709000  | 0.390834000  | 0.244947000  |
| C | -0.330280000 | -0.127585000 | 2.170550000  |
| C | 1.293449000  | -1.743997000 | 1.585959000  |
| H | 0.834191000  | -2.567730000 | 1.027402000  |
| H | 2.346948000  | -1.630830000 | 1.334937000  |
| C | -0.850182000 | 2.431556000  | -0.075760000 |
| C | 0.023127000  | 3.229374000  | -0.807284000 |
| C | -2.205585000 | 2.740025000  | 0.035537000  |
| C | -0.490771000 | 4.338722000  | -1.474673000 |
| H | 1.083888000  | 2.990052000  | -0.818933000 |
| C | -2.696705000 | 3.855080000  | -0.630838000 |
| H | -2.846066000 | 2.109706000  | 0.641564000  |
| C | -1.843837000 | 4.650921000  | -1.394610000 |
| H | 0.180615000  | 4.967710000  | -2.049593000 |
| H | -3.750162000 | 4.103614000  | -0.551913000 |
| H | -2.233821000 | 5.518657000  | -1.916431000 |
| C | 1.010542000  | -1.809866000 | 3.100926000  |
| H | 1.008075000  | -2.834333000 | 3.473985000  |
| H | 1.796790000  | -1.250066000 | 3.613615000  |
| C | -0.348352000 | -1.093118000 | 3.310575000  |
| H | -0.437129000 | -0.598352000 | 4.277799000  |

H -1.195122000 -1.778650000 3.193606000

**B-1b-Re**

C -1.353784000 -3.697582000 -1.521659000  
C -0.056077000 -4.098212000 -1.220231000  
C 0.929248000 -3.142383000 -0.992426000  
C 0.615685000 -1.782503000 -1.064225000  
C -0.707240000 -1.375750000 -1.310061000  
C -1.672125000 -2.341349000 -1.564300000  
C -1.069137000 0.112610000 -1.348564000  
N 1.562736000 -0.774451000 -0.788705000  
C -2.444073000 0.484471000 -1.817604000  
C -3.453631000 0.551288000 -0.873676000  
C 2.767064000 -0.901492000 -1.179927000  
O -3.330498000 0.410000000 0.369743000  
C 3.797038000 0.093125000 -0.838300000  
C 3.498194000 1.183331000 -0.010800000  
C 4.484909000 2.106369000 0.303855000  
C 5.777174000 1.953554000 -0.202502000  
C 6.079725000 0.872190000 -1.024525000  
C 5.091817000 -0.055602000 -1.339425000  
O -4.699603000 0.861310000 -1.390566000  
C -5.735201000 0.899619000 -0.431251000  
H -2.123946000 -4.440237000 -1.704365000  
H 0.191597000 -5.153028000 -1.153711000  
H 1.934722000 -3.443366000 -0.712552000  
H -2.679418000 -1.998625000 -1.781217000  
H -2.639232000 0.596910000 -2.873900000  
H -0.327405000 0.581442000 -2.015626000  
H 3.093815000 -1.754602000 -1.792342000  
H 2.486415000 1.282574000 0.373402000  
H 4.252419000 2.948582000 0.947850000  
H 6.546480000 2.677736000 0.046130000  
H 7.083074000 0.751139000 -1.419369000  
H 5.322827000 -0.903392000 -1.979442000  
H -6.644881000 1.156322000 -0.977534000  
H -5.860300000 -0.067720000 0.065257000  
H -5.541244000 1.647063000 0.344329000  
N -0.920247000 2.172822000 0.035777000  
N -0.298637000 1.526595000 2.041735000  
N -0.425623000 0.465056000 1.175864000  
C -0.824587000 0.836834000 -0.047601000  
C -0.621510000 2.546634000 1.310000000  
C -1.433088000 3.261668000 -0.792025000  
H -2.518039000 3.154722000 -0.862048000



|   |              |              |              |
|---|--------------|--------------|--------------|
| H | -1.014322000 | 3.216945000  | -1.797351000 |
| C | -0.269118000 | -0.856696000 | 1.703545000  |
| C | -1.356062000 | -1.720607000 | 1.665721000  |
| C | 0.957916000  | -1.217261000 | 2.246773000  |
| C | -1.183144000 | -3.010046000 | 2.161774000  |
| H | -2.295459000 | -1.360742000 | 1.249834000  |
| C | 1.107513000  | -2.504153000 | 2.750204000  |
| H | 1.774693000  | -0.502932000 | 2.250705000  |
| C | 0.041311000  | -3.400820000 | 2.698310000  |
| H | -2.011693000 | -3.709503000 | 2.127944000  |
| H | 2.058090000  | -2.810027000 | 3.174524000  |
| H | 0.165933000  | -4.408027000 | 3.083144000  |
| C | -0.965131000 | 4.492276000  | 0.022218000  |
| H | 0.014272000  | 4.814835000  | -0.340289000 |
| H | -1.656768000 | 5.328168000  | -0.083865000 |
| C | -0.837954000 | 4.014406000  | 1.493033000  |
| H | -0.026868000 | 4.500896000  | 2.035347000  |
| H | -1.765960000 | 4.170724000  | 2.051037000  |

**B-11b**

|   |              |              |              |
|---|--------------|--------------|--------------|
| C | -1.439234000 | 1.019547000  | -3.802113000 |
| C | -0.435350000 | 0.293206000  | -4.435419000 |
| C | 0.583721000  | -0.278987000 | -3.681830000 |
| C | 0.587226000  | -0.137780000 | -2.290985000 |
| C | -0.448454000 | 0.563173000  | -1.641642000 |
| C | -1.441479000 | 1.154626000  | -2.415109000 |
| C | -0.500139000 | 0.569965000  | -0.118523000 |
| N | 1.601056000  | -0.693415000 | -1.476223000 |
| C | -1.549894000 | 1.405977000  | 0.572635000  |
| C | -1.529849000 | 2.806902000  | 0.424887000  |
| C | 2.814592000  | -0.623619000 | -1.860262000 |
| O | -0.867031000 | 3.477285000  | -0.381038000 |
| C | 3.935732000  | -1.080833000 | -1.026661000 |
| C | 3.720636000  | -1.589308000 | 0.260189000  |
| C | 4.799988000  | -1.962726000 | 1.047988000  |
| C | 6.101382000  | -1.839543000 | 0.558620000  |
| C | 6.321930000  | -1.338072000 | -0.721282000 |
| C | 5.241321000  | -0.955764000 | -1.509826000 |
| O | -2.404679000 | 3.445419000  | 1.276558000  |
| C | -2.487692000 | 4.845952000  | 1.094334000  |
| H | -2.233355000 | 1.473440000  | -4.385620000 |
| H | -0.447590000 | 0.163610000  | -5.512830000 |
| H | 1.354618000  | -0.877247000 | -4.158808000 |
| H | -2.227490000 | 1.707438000  | -1.914149000 |
| H | -1.903486000 | 1.020022000  | 1.524162000  |

|   |              |              |              |
|---|--------------|--------------|--------------|
| H | -0.696176000 | -0.472589000 | 0.144061000  |
| H | 3.085358000  | -0.163204000 | -2.823567000 |
| H | 2.703204000  | -1.680749000 | 0.626745000  |
| H | 4.628627000  | -2.349059000 | 2.047304000  |
| H | 6.943379000  | -2.133329000 | 1.177179000  |
| H | 7.332877000  | -1.242908000 | -1.103709000 |
| H | 5.406001000  | -0.558233000 | -2.508427000 |
| H | -3.205237000 | 5.205661000  | 1.832864000  |
| H | -1.516499000 | 5.325002000  | 1.248621000  |
| H | -2.829848000 | 5.095669000  | 0.085828000  |
| N | 1.664381000  | 1.890401000  | 0.042779000  |
| N | 2.504694000  | 1.201249000  | 1.961979000  |
| N | 1.354463000  | 0.523302000  | 1.631418000  |
| C | 0.819279000  | 0.942242000  | 0.468107000  |
| C | 2.664713000  | 2.014833000  | 0.965285000  |
| C | 1.856951000  | 2.728042000  | -1.145089000 |
| H | 2.296821000  | 2.109429000  | -1.936436000 |
| H | 0.897617000  | 3.140584000  | -1.453222000 |
| C | 0.817239000  | -0.444940000 | 2.533387000  |
| C | 0.317593000  | -1.648013000 | 2.043591000  |
| C | 0.799866000  | -0.146415000 | 3.893382000  |
| C | -0.258538000 | -2.547032000 | 2.935839000  |
| H | 0.351168000  | -1.881421000 | 0.984552000  |
| C | 0.254619000  | -1.071574000 | 4.775108000  |
| H | 1.206214000  | 0.797793000  | 4.237595000  |
| C | -0.286184000 | -2.264989000 | 4.297797000  |
| H | -0.689748000 | -3.462819000 | 2.546576000  |
| H | 0.235477000  | -0.850395000 | 5.836961000  |
| H | -0.730743000 | -2.971985000 | 4.990391000  |
| C | 2.849454000  | 3.769745000  | -0.586777000 |
| H | 3.485272000  | 4.189407000  | -1.366679000 |
| H | 2.272144000  | 4.579315000  | -0.132656000 |
| C | 3.660323000  | 3.034164000  | 0.513511000  |
| H | 3.992522000  | 3.686949000  | 1.320916000  |
| H | 4.536230000  | 2.522613000  | 0.099392000  |
| C | -2.921428000 | -4.329301000 | -0.718269000 |
| C | -1.931313000 | -3.220713000 | -1.081060000 |
| H | -2.644144000 | -4.777215000 | 0.240694000  |
| H | -3.930020000 | -3.913891000 | -0.621811000 |
| H | -2.944070000 | -5.114603000 | -1.480654000 |
| C | -2.334082000 | -2.548990000 | -2.393903000 |
| C | -0.512416000 | -3.773344000 | -1.171451000 |
| H | -1.614994000 | -1.768342000 | -2.659170000 |
| H | -2.372592000 | -3.281041000 | -3.206820000 |
| H | -3.318074000 | -2.079232000 | -2.295174000 |

|   |              |              |              |
|---|--------------|--------------|--------------|
| H | -0.432747000 | -4.539428000 | -1.948520000 |
| H | 0.186750000  | -2.961392000 | -1.400348000 |
| H | -0.221897000 | -4.220864000 | -0.214307000 |
| C | -4.489180000 | -0.765801000 | 1.717624000  |
| C | -4.826579000 | -0.148989000 | 0.357445000  |
| H | -4.099590000 | -1.780371000 | 1.584513000  |
| H | -3.724844000 | -0.172607000 | 2.228816000  |
| H | -5.374779000 | -0.808876000 | 2.359677000  |
| C | -5.276711000 | 1.303399000  | 0.515098000  |
| C | -5.892035000 | -0.977041000 | -0.351487000 |
| H | -5.505239000 | 1.729099000  | -0.466788000 |
| H | -6.172656000 | 1.368136000  | 1.140729000  |
| H | -4.484067000 | 1.904869000  | 0.974275000  |
| H | -6.821052000 | -0.997498000 | 0.225900000  |
| H | -6.095915000 | -0.554561000 | -1.339114000 |
| H | -5.541859000 | -2.006243000 | -0.482732000 |
| O | -1.909630000 | -2.265827000 | -0.024346000 |
| H | -2.626505000 | -1.612784000 | -0.178553000 |
| O | -3.676819000 | -0.193130000 | -0.489512000 |
| H | -3.032008000 | 0.505140000  | -0.179442000 |

#### **B-TSb2**

|   |              |              |              |
|---|--------------|--------------|--------------|
| C | 1.506484000  | -1.357548000 | -3.664461000 |
| C | 0.471907000  | -0.768895000 | -4.385348000 |
| C | -0.577413000 | -0.155402000 | -3.711229000 |
| C | -0.589506000 | -0.132996000 | -2.313391000 |
| C | 0.457517000  | -0.725855000 | -1.579406000 |
| C | 1.500092000  | -1.334832000 | -2.271845000 |
| C | 0.474777000  | -0.559365000 | -0.067976000 |
| N | -1.610962000 | 0.498935000  | -1.570562000 |
| C | 1.607592000  | -1.239908000 | 0.703064000  |
| C | 1.562491000  | -2.707151000 | 0.728180000  |
| C | -2.822894000 | 0.434983000  | -1.958826000 |
| O | 0.864216000  | -3.431749000 | 0.034227000  |
| C | -3.925361000 | 0.993464000  | -1.161417000 |
| C | -3.673128000 | 1.680582000  | 0.032929000  |
| C | -4.729976000 | 2.140453000  | 0.804713000  |
| C | -6.045875000 | 1.926051000  | 0.391185000  |
| C | -6.303392000 | 1.250102000  | -0.798292000 |
| C | -5.244855000 | 0.783729000  | -1.571858000 |
| O | 2.440404000  | -3.222504000 | 1.614787000  |
| C | 2.526242000  | -4.641917000 | 1.630489000  |
| H | 2.339246000  | -1.817257000 | -4.185905000 |
| H | 0.493079000  | -0.763627000 | -5.470260000 |
| H | -1.361044000 | 0.358588000  | -4.259945000 |

|   |              |              |              |
|---|--------------|--------------|--------------|
| H | 2.342736000  | -1.734480000 | -1.720719000 |
| H | 1.679390000  | -0.843431000 | 1.720921000  |
| H | 0.656661000  | 0.512766000  | 0.064237000  |
| H | -3.108320000 | -0.094649000 | -2.881449000 |
| H | -2.643844000 | 1.842581000  | 0.338690000  |
| H | -4.529813000 | 2.666413000  | 1.732321000  |
| H | -6.870189000 | 2.287672000  | 0.997528000  |
| H | -7.325890000 | 1.086998000  | -1.122844000 |
| H | -5.438583000 | 0.254084000  | -2.501618000 |
| H | 3.271883000  | -4.886881000 | 2.385507000  |
| H | 1.561268000  | -5.086360000 | 1.887185000  |
| H | 2.834807000  | -5.020505000 | 0.653359000  |
| N | -1.718223000 | -1.830600000 | 0.186899000  |
| N | -2.570442000 | -0.920817000 | 2.004527000  |
| N | -1.374221000 | -0.344693000 | 1.656410000  |
| C | -0.841930000 | -0.883626000 | 0.545887000  |
| C | -2.752910000 | -1.810282000 | 1.078199000  |
| C | -1.914196000 | -2.779690000 | -0.913497000 |
| H | -2.265248000 | -2.224076000 | -1.789905000 |
| H | -0.973716000 | -3.281451000 | -1.133143000 |
| C | -0.804429000 | 0.666209000  | 2.498508000  |
| C | -0.251847000 | 1.811859000  | 1.937169000  |
| C | -0.807419000 | 0.448935000  | 3.874126000  |
| C | 0.361352000  | 2.736181000  | 2.777714000  |
| H | -0.258255000 | 1.983667000  | 0.866618000  |
| C | -0.225350000 | 1.400907000  | 4.701387000  |
| H | -1.256351000 | -0.453680000 | 4.273120000  |
| C | 0.370688000  | 2.536846000  | 4.154073000  |
| H | 0.840405000  | 3.601856000  | 2.333904000  |
| H | -0.219692000 | 1.244655000  | 5.774746000  |
| H | 0.847762000  | 3.262403000  | 4.804485000  |
| C | -3.005938000 | -3.689628000 | -0.308513000 |
| H | -3.640283000 | -4.129052000 | -1.078484000 |
| H | -2.519780000 | -4.499088000 | 0.241836000  |
| C | -3.801024000 | -2.797891000 | 0.680827000  |
| H | -4.211367000 | -3.345605000 | 1.529233000  |
| H | -4.619382000 | -2.266615000 | 0.182416000  |
| C | 2.990914000  | 4.088862000  | -0.949621000 |
| C | 1.966922000  | 2.988445000  | -1.247724000 |
| H | 2.749318000  | 4.570074000  | 0.003619000  |
| H | 3.991682000  | 3.654134000  | -0.864926000 |
| H | 3.009507000  | 4.852042000  | -1.735148000 |
| C | 2.326104000  | 2.269186000  | -2.551571000 |
| C | 0.565468000  | 3.591100000  | -1.346123000 |
| H | 1.548024000  | 1.544177000  | -2.810930000 |

|   |              |              |              |
|---|--------------|--------------|--------------|
| H | 2.426587000  | 2.982115000  | -3.376927000 |
| H | 3.263084000  | 1.717887000  | -2.428423000 |
| H | 0.495870000  | 4.321496000  | -2.158718000 |
| H | -0.167550000 | 2.795365000  | -1.526192000 |
| H | 0.306435000  | 4.096323000  | -0.407842000 |
| C | 4.597393000  | 0.970052000  | 1.514049000  |
| C | 4.751696000  | 0.192519000  | 0.196750000  |
| H | 4.188430000  | 1.965197000  | 1.310281000  |
| H | 3.894578000  | 0.450254000  | 2.175209000  |
| H | 5.551178000  | 1.077599000  | 2.043260000  |
| C | 5.257001000  | -1.227669000 | 0.491739000  |
| C | 5.761870000  | 0.909798000  | -0.707342000 |
| H | 5.338425000  | -1.786733000 | -0.446755000 |
| H | 6.238652000  | -1.220107000 | 0.979400000  |
| H | 4.551580000  | -1.755716000 | 1.142999000  |
| H | 6.755218000  | 0.975327000  | -0.248361000 |
| H | 5.844729000  | 0.372767000  | -1.657328000 |
| H | 5.412851000  | 1.925309000  | -0.922941000 |
| O | 1.941888000  | 2.078214000  | -0.165820000 |
| H | 2.660552000  | 1.344657000  | -0.299676000 |
| O | 3.524768000  | 0.119672000  | -0.473308000 |
| H | 2.627692000  | -0.751590000 | 0.172282000  |

**B-2b**

|   |              |              |              |
|---|--------------|--------------|--------------|
| C | -1.782988000 | 4.279328000  | -1.414855000 |
| C | -0.484135000 | 4.597513000  | -1.817987000 |
| C | 0.508192000  | 3.632014000  | -1.738292000 |
| C | 0.220185000  | 2.343878000  | -1.267825000 |
| C | -1.094374000 | 2.006496000  | -0.848244000 |
| C | -2.077490000 | 3.011097000  | -0.939008000 |
| C | -1.424554000 | 0.651722000  | -0.405373000 |
| N | 1.188043000  | 1.325453000  | -1.237953000 |
| C | -2.745347000 | 0.035250000  | -0.827560000 |
| C | -3.566989000 | -0.237691000 | 0.407688000  |
| C | 2.372034000  | 1.572231000  | -0.840849000 |
| O | -3.535475000 | -1.254473000 | 1.058137000  |
| C | 3.353647000  | 0.500400000  | -0.611190000 |
| C | 2.959584000  | -0.843867000 | -0.639339000 |
| C | 3.867269000  | -1.841805000 | -0.312394000 |
| C | 5.178260000  | -1.511491000 | 0.034313000  |
| C | 5.577886000  | -0.177438000 | 0.060288000  |
| C | 4.665567000  | 0.825088000  | -0.253477000 |
| O | -4.305348000 | 0.835732000  | 0.764200000  |
| C | -5.021862000 | 0.684727000  | 1.986534000  |
| H | -2.567363000 | 5.027816000  | -1.471986000 |

|   |              |              |              |
|---|--------------|--------------|--------------|
| H | -0.253740000 | 5.584468000  | -2.205365000 |
| H | 1.511575000  | 3.845356000  | -2.096569000 |
| H | -3.084262000 | 2.778671000  | -0.601704000 |
| H | -3.274717000 | 0.735833000  | -1.475542000 |
| H | -2.635123000 | -0.911401000 | -1.365393000 |
| H | 2.692344000  | 2.588576000  | -0.558641000 |
| H | 1.931891000  | -1.084791000 | -0.896245000 |
| H | 3.547380000  | -2.878720000 | -0.316284000 |
| H | 5.885198000  | -2.294326000 | 0.290465000  |
| H | 6.596567000  | 0.081163000  | 0.330929000  |
| H | 4.967535000  | 1.869256000  | -0.220937000 |
| H | -5.548171000 | 1.624834000  | 2.144780000  |
| H | -5.729115000 | -0.144694000 | 1.916782000  |
| H | -4.332831000 | 0.485709000  | 2.810678000  |
| N | 0.360352000  | 0.465809000  | 1.292933000  |
| N | 0.518519000  | -1.725676000 | 1.593613000  |
| N | -0.407200000 | -1.415832000 | 0.591217000  |
| C | -0.548354000 | -0.052584000 | 0.393830000  |
| C | 0.945642000  | -0.570747000 | 1.966961000  |
| C | 0.560625000  | 1.763450000  | 1.906141000  |
| H | 1.148452000  | 2.419020000  | 1.255543000  |
| H | -0.405607000 | 2.245067000  | 2.084792000  |
| C | -0.767310000 | -2.444711000 | -0.311371000 |
| C | -1.212986000 | -3.663147000 | 0.194942000  |
| C | -0.626520000 | -2.247433000 | -1.685245000 |
| C | -1.518843000 | -4.693300000 | -0.685742000 |
| H | -1.315795000 | -3.779198000 | 1.267758000  |
| C | -0.953546000 | -3.281946000 | -2.556902000 |
| H | -0.271721000 | -1.285314000 | -2.048503000 |
| C | -1.395625000 | -4.505835000 | -2.061436000 |
| H | -1.869541000 | -5.643561000 | -0.296417000 |
| H | -0.850180000 | -3.131387000 | -3.626706000 |
| H | -1.646262000 | -5.310726000 | -2.744549000 |
| C | 1.305842000  | 1.387360000  | 3.215755000  |
| H | 2.071315000  | 2.120883000  | 3.472158000  |
| H | 0.587481000  | 1.348814000  | 4.038536000  |
| C | 1.893381000  | -0.030045000 | 2.986376000  |
| H | 2.897706000  | 0.014069000  | 2.548717000  |
| H | 1.932413000  | -0.634855000 | 3.891896000  |

### **B-TSb3**

|   |             |             |              |
|---|-------------|-------------|--------------|
| C | 4.015555000 | 2.389623000 | -0.583612000 |
| C | 4.765516000 | 1.392571000 | -1.210078000 |
| C | 4.176501000 | 0.210211000 | -1.644233000 |
| C | 2.800968000 | 0.001429000 | -1.455474000 |

|   |              |              |              |
|---|--------------|--------------|--------------|
| C | 2.031072000  | 1.039247000  | -0.840708000 |
| C | 2.642690000  | 2.201602000  | -0.391212000 |
| C | 0.603600000  | 0.627458000  | -0.591635000 |
| N | 2.140484000  | -1.177612000 | -1.662790000 |
| C | -0.501412000 | 1.468266000  | -1.181197000 |
| C | -0.830691000 | 2.727525000  | -0.410310000 |
| C | 0.839362000  | -0.891415000 | -1.845446000 |
| O | -0.295783000 | 3.105131000  | 0.606289000  |
| C | -0.175084000 | -1.962843000 | -1.652750000 |
| C | 0.016822000  | -2.959191000 | -0.689556000 |
| C | -0.927377000 | -3.966089000 | -0.520584000 |
| C | -2.069698000 | -3.998323000 | -1.323535000 |
| C | -2.266577000 | -3.012327000 | -2.287711000 |
| C | -1.327228000 | -1.995107000 | -2.442341000 |
| O | -1.833144000 | 3.398568000  | -0.998373000 |
| C | -2.229912000 | 4.594324000  | -0.331711000 |
| H | 4.492157000  | 3.305272000  | -0.249500000 |
| H | 5.831157000  | 1.541837000  | -1.363193000 |
| H | 4.761989000  | -0.567879000 | -2.123008000 |
| H | 2.051655000  | 2.952803000  | 0.124926000  |
| H | -0.192019000 | 1.783789000  | -2.184390000 |
| H | -1.438844000 | 0.912424000  | -1.313971000 |
| H | 0.562220000  | -0.217851000 | -2.678398000 |
| H | 0.935052000  | -2.937198000 | -0.107942000 |
| H | -0.772419000 | -4.735245000 | 0.229662000  |
| H | -2.800263000 | -4.791182000 | -1.197757000 |
| H | -3.149155000 | -3.036223000 | -2.919485000 |
| H | -1.473128000 | -1.226467000 | -3.197462000 |
| H | -2.556777000 | 4.370971000  | 0.687195000  |
| H | -1.398600000 | 5.300918000  | -0.284837000 |
| H | -3.051644000 | 5.004725000  | -0.916107000 |
| N | 1.391960000  | -0.582443000 | 1.430333000  |
| N | -0.495230000 | -1.127252000 | 2.452241000  |
| N | -0.725463000 | -0.324608000 | 1.355657000  |
| C | 0.415900000  | 0.019465000  | 0.689618000  |
| C | 0.789109000  | -1.259525000 | 2.456616000  |
| C | 2.863922000  | -0.720885000 | 1.457380000  |
| H | 3.156952000  | -1.435145000 | 0.684878000  |
| H | 3.348737000  | 0.236100000  | 1.266199000  |
| C | -2.080792000 | 0.030226000  | 1.062392000  |
| C | -2.866182000 | -0.873713000 | 0.356815000  |
| C | -2.592915000 | 1.239952000  | 1.521388000  |
| C | -4.180685000 | -0.531314000 | 0.055845000  |
| H | -2.440930000 | -1.822624000 | 0.048466000  |
| C | -3.908764000 | 1.572462000  | 1.211475000  |

|   |              |              |              |
|---|--------------|--------------|--------------|
| H | -1.955708000 | 1.908939000  | 2.089406000  |
| C | -4.697681000 | 0.693272000  | 0.472879000  |
| H | -4.796501000 | -1.223950000 | -0.508642000 |
| H | -4.320083000 | 2.516023000  | 1.555452000  |
| H | -5.721542000 | 0.959215000  | 0.230611000  |
| C | 3.091927000  | -1.238112000 | 2.893743000  |
| H | 3.977305000  | -1.871778000 | 2.953309000  |
| H | 3.235475000  | -0.387640000 | 3.565452000  |
| C | 1.796216000  | -1.983673000 | 3.287465000  |
| H | 1.828499000  | -3.035423000 | 2.983524000  |
| H | 1.570592000  | -1.941300000 | 4.353066000  |

**B-3b**

|   |              |              |              |
|---|--------------|--------------|--------------|
| C | 4.092531000  | 2.051663000  | -0.792234000 |
| C | 4.813017000  | 0.928005000  | -1.228167000 |
| C | 4.193349000  | -0.264232000 | -1.563054000 |
| C | 2.780987000  | -0.375554000 | -1.467653000 |
| C | 2.060513000  | 0.795200000  | -1.056026000 |
| C | 2.698866000  | 1.971417000  | -0.698369000 |
| C | 0.616410000  | 0.357729000  | -0.851710000 |
| N | 2.046360000  | -1.482398000 | -1.637466000 |
| C | -0.460702000 | 1.280958000  | -1.409999000 |
| C | -0.667301000 | 2.560629000  | -0.639809000 |
| C | 0.702505000  | -1.001642000 | -1.737964000 |
| O | -0.111979000 | 2.866613000  | 0.391586000  |
| C | -0.358575000 | -2.036307000 | -1.460486000 |
| C | -0.196364000 | -2.968616000 | -0.430981000 |
| C | -1.172662000 | -3.929614000 | -0.184789000 |
| C | -2.319442000 | -3.985507000 | -0.979564000 |
| C | -2.480461000 | -3.075315000 | -2.021037000 |
| C | -1.505582000 | -2.106867000 | -2.254031000 |
| O | -1.581724000 | 3.336103000  | -1.235157000 |
| C | -1.865367000 | 4.563450000  | -0.565397000 |
| H | 4.607410000  | 2.972876000  | -0.543949000 |
| H | 5.895977000  | 0.995975000  | -1.306084000 |
| H | 4.766628000  | -1.126832000 | -1.887285000 |
| H | 2.129723000  | 2.817479000  | -0.324898000 |
| H | -0.163301000 | 1.552059000  | -2.427557000 |
| H | -1.435495000 | 0.782958000  | -1.493732000 |
| H | 0.496276000  | -0.595510000 | -2.752217000 |
| H | 0.730327000  | -2.945610000 | 0.137427000  |
| H | -1.034946000 | -4.650439000 | 0.615383000  |
| H | -3.073202000 | -4.744710000 | -0.795909000 |
| H | -3.359912000 | -3.122967000 | -2.656136000 |
| H | -1.622978000 | -1.404810000 | -3.076223000 |



|   |              |              |              |
|---|--------------|--------------|--------------|
| H | -2.293319000 | 4.365872000  | 0.421009000  |
| H | -0.954067000 | 5.152183000  | -0.444002000 |
| H | -2.583127000 | 5.087085000  | -1.194037000 |
| N | 1.386331000  | -0.434697000 | 1.433435000  |
| N | -0.481025000 | -0.588236000 | 2.597388000  |
| N | -0.706325000 | -0.100219000 | 1.338111000  |
| C | 0.420074000  | -0.000013000 | 0.599970000  |
| C | 0.798964000  | -0.790348000 | 2.613844000  |
| C | 2.848979000  | -0.676442000 | 1.440186000  |
| H | 3.038714000  | -1.557056000 | 0.822378000  |
| H | 3.378877000  | 0.179298000  | 1.023658000  |
| C | -2.067156000 | 0.245866000  | 1.020518000  |
| C | -2.871838000 | -0.697756000 | 0.397585000  |
| C | -2.561888000 | 1.480075000  | 1.430974000  |
| C | -4.192372000 | -0.363518000 | 0.109432000  |
| H | -2.469738000 | -1.672870000 | 0.152621000  |
| C | -3.884607000 | 1.798329000  | 1.141589000  |
| H | -1.907055000 | 2.174022000  | 1.945902000  |
| C | -4.694219000 | 0.883631000  | 0.469991000  |
| H | -4.824623000 | -1.088529000 | -0.392319000 |
| H | -4.284986000 | 2.759203000  | 1.448182000  |
| H | -5.723684000 | 1.139631000  | 0.241483000  |
| C | 3.120873000  | -0.878769000 | 2.946353000  |
| H | 3.933531000  | -1.587018000 | 3.108526000  |
| H | 3.411502000  | 0.076902000  | 3.389443000  |
| C | 1.790274000  | -1.351537000 | 3.577086000  |
| H | 1.706035000  | -2.442825000 | 3.585758000  |
| H | 1.634854000  | -0.988739000 | 4.593308000  |

**B-4b**

|   |              |              |              |
|---|--------------|--------------|--------------|
| C | -1.798904000 | 2.434969000  | -3.637357000 |
| C | -1.221911000 | 3.633545000  | -3.218968000 |
| C | -0.529294000 | 3.720958000  | -2.011617000 |
| C | -0.426606000 | 2.580215000  | -1.220212000 |
| C | -1.003909000 | 1.375386000  | -1.642976000 |
| C | -1.674905000 | 1.284223000  | -2.854307000 |
| C | -0.556692000 | 0.290302000  | -0.668582000 |
| N | 0.223666000  | 2.471237000  | 0.018602000  |
| C | 0.717583000  | -0.359771000 | -1.246878000 |
| C | 0.422353000  | -1.418231000 | -2.272123000 |
| C | -0.156786000 | 1.185030000  | 0.598877000  |
| O | -0.674173000 | -1.668727000 | -2.731172000 |
| C | -1.279025000 | 1.344474000  | 1.617871000  |
| C | -1.977764000 | 2.547374000  | 1.745330000  |
| C | -3.025660000 | 2.669974000  | 2.657723000  |

|   |              |              |              |
|---|--------------|--------------|--------------|
| C | -3.382487000 | 1.596586000  | 3.470099000  |
| C | -2.676194000 | 0.398801000  | 3.369932000  |
| C | -1.631642000 | 0.279974000  | 2.458101000  |
| O | 1.527057000  | -2.080050000 | -2.620004000 |
| C | 1.337898000  | -3.124014000 | -3.574832000 |
| H | -2.325941000 | 2.388982000  | -4.584450000 |
| H | -1.312382000 | 4.517107000  | -3.843374000 |
| H | -0.079429000 | 4.652083000  | -1.683295000 |
| H | -2.061058000 | 0.327552000  | -3.195859000 |
| H | 1.297711000  | 0.440347000  | -1.715085000 |
| H | 1.391661000  | -0.747092000 | -0.479297000 |
| H | 0.718671000  | 0.725801000  | 1.081803000  |
| H | -1.676557000 | 3.389930000  | 1.131416000  |
| H | -3.553362000 | 3.615109000  | 2.744066000  |
| H | -4.189427000 | 1.697861000  | 4.189206000  |
| H | -2.924490000 | -0.439368000 | 4.013603000  |
| H | -1.078406000 | -0.655215000 | 2.408002000  |
| H | 0.639357000  | -3.866475000 | -3.182476000 |
| H | 0.943889000  | -2.719841000 | -4.509555000 |
| H | 2.320810000  | -3.564662000 | -3.729138000 |
| N | -2.965979000 | -0.345191000 | -0.309929000 |
| N | -2.866001000 | -2.426586000 | 0.394498000  |
| N | -1.624255000 | -1.936791000 | 0.090678000  |
| C | -1.661446000 | -0.666013000 | -0.345126000 |
| C | -3.655772000 | -1.427521000 | 0.151400000  |
| C | -3.839511000 | 0.813838000  | -0.565612000 |
| H | -3.365706000 | 1.732989000  | -0.226521000 |
| H | -4.026682000 | 0.876968000  | -1.640098000 |
| O | 2.531752000  | -0.238617000 | 1.464745000  |
| H | 2.782342000  | 0.704806000  | 0.638481000  |
| O | 2.813409000  | 1.577712000  | -0.100859000 |
| H | 1.257363000  | 2.506212000  | -0.057108000 |
| C | 3.979100000  | 1.707311000  | -0.869860000 |
| C | 5.158742000  | 1.028195000  | -0.165654000 |
| C | 3.776292000  | 1.061788000  | -2.249776000 |
| C | 4.262981000  | 3.201371000  | -1.045898000 |
| H | 5.363628000  | 1.525385000  | 0.788301000  |
| H | 4.909567000  | -0.016807000 | 0.044062000  |
| H | 6.067304000  | 1.065190000  | -0.776150000 |
| H | 2.939782000  | 1.547633000  | -2.767273000 |
| H | 4.666790000  | 1.159309000  | -2.880563000 |
| H | 3.546008000  | -0.003898000 | -2.140032000 |
| H | 5.160115000  | 3.380900000  | -1.648466000 |
| H | 3.411141000  | 3.682872000  | -1.539234000 |
| H | 4.395982000  | 3.666592000  | -0.064648000 |

|   |              |              |              |
|---|--------------|--------------|--------------|
| C | 2.895550000  | 0.056155000  | 2.782886000  |
| C | 1.879290000  | -0.582156000 | 3.742278000  |
| C | 4.285669000  | -0.523758000 | 3.090074000  |
| C | 2.907957000  | 1.574725000  | 3.024737000  |
| H | 0.885799000  | -0.149881000 | 3.573357000  |
| H | 1.822483000  | -1.663584000 | 3.568412000  |
| H | 2.144061000  | -0.418297000 | 4.792884000  |
| H | 5.035895000  | -0.074860000 | 2.433989000  |
| H | 4.584633000  | -0.349495000 | 4.130282000  |
| H | 4.281906000  | -1.604319000 | 2.908277000  |
| H | 3.192097000  | 1.817430000  | 4.054790000  |
| H | 3.602700000  | 2.064380000  | 2.337151000  |
| H | 1.911663000  | 1.992294000  | 2.834000000  |
| C | -0.503687000 | -2.828232000 | 0.217963000  |
| C | 0.614513000  | -2.450968000 | 0.944396000  |
| C | -0.589064000 | -4.064026000 | -0.421177000 |
| C | 1.707440000  | -3.314111000 | 0.985114000  |
| H | 0.724201000  | -1.478533000 | 1.418633000  |
| C | 0.492147000  | -4.931180000 | -0.335780000 |
| H | -1.482369000 | -4.318280000 | -0.980920000 |
| C | 1.644250000  | -4.552693000 | 0.357702000  |
| H | 2.601414000  | -2.964366000 | 1.491032000  |
| H | 0.442119000  | -5.897395000 | -0.827180000 |
| H | 2.494999000  | -5.225092000 | 0.396150000  |
| C | -5.087991000 | 0.423696000  | 0.252497000  |
| H | -5.995741000 | 0.855100000  | -0.169840000 |
| H | -4.961511000 | 0.796630000  | 1.272522000  |
| C | -5.113021000 | -1.125315000 | 0.269903000  |
| H | -5.544853000 | -1.541266000 | 1.180132000  |
| H | -5.651520000 | -1.537366000 | -0.589522000 |

#### **B-TSb4**

|   |              |              |              |
|---|--------------|--------------|--------------|
| C | -1.609966000 | -0.328349000 | -4.415158000 |
| C | -1.151667000 | 0.944915000  | -4.750693000 |
| C | -0.575848000 | 1.781543000  | -3.794647000 |
| C | -0.473659000 | 1.323907000  | -2.483476000 |
| C | -0.920584000 | 0.038201000  | -2.149078000 |
| C | -1.476998000 | -0.799289000 | -3.105312000 |
| C | -0.497976000 | -0.219309000 | -0.700905000 |
| N | 0.043960000  | 2.006020000  | -1.373531000 |
| C | 0.878632000  | -0.910971000 | -0.748786000 |
| C | 0.826330000  | -2.367946000 | -1.111371000 |
| C | -0.315546000 | 1.268639000  | -0.150606000 |
| O | -0.175062000 | -3.007896000 | -1.354046000 |
| C | -1.532255000 | 1.870348000  | 0.477184000  |

|   |              |              |              |
|---|--------------|--------------|--------------|
| C | -2.144559000 | 3.024434000  | -0.050168000 |
| C | -3.265541000 | 3.596055000  | 0.545854000  |
| C | -3.819096000 | 3.049635000  | 1.701321000  |
| C | -3.208287000 | 1.930632000  | 2.266887000  |
| C | -2.084592000 | 1.364292000  | 1.674823000  |
| O | 2.050601000  | -2.912748000 | -1.104261000 |
| C | 2.092764000  | -4.314485000 | -1.366657000 |
| H | -2.050399000 | -0.964346000 | -5.175942000 |
| H | -1.249640000 | 1.296307000  | -5.773455000 |
| H | -0.225317000 | 2.775035000  | -4.054571000 |
| H | -1.770850000 | -1.812230000 | -2.843294000 |
| H | 1.485895000  | -0.370376000 | -1.483275000 |
| H | 1.431770000  | -0.797303000 | 0.185658000  |
| H | 0.858857000  | 1.319241000  | 0.787576000  |
| H | -1.719015000 | 3.461569000  | -0.946414000 |
| H | -3.710424000 | 4.481447000  | 0.100041000  |
| H | -4.688983000 | 3.500649000  | 2.167775000  |
| H | -3.594260000 | 1.506195000  | 3.190075000  |
| H | -1.612024000 | 0.520380000  | 2.173479000  |
| H | 1.549386000  | -4.855642000 | -0.587702000 |
| H | 1.642233000  | -4.536023000 | -2.336017000 |
| H | 3.146394000  | -4.586875000 | -1.358472000 |
| N | -2.865281000 | -0.861154000 | -0.155076000 |
| N | -2.660075000 | -2.232809000 | 1.554167000  |
| N | -1.440507000 | -1.816822000 | 1.085548000  |
| C | -1.542298000 | -0.978552000 | 0.039858000  |
| C | -3.502808000 | -1.618891000 | 0.782211000  |
| C | -3.789163000 | -0.067319000 | -0.981429000 |
| H | -3.410881000 | 0.948934000  | -1.092304000 |
| H | -3.873310000 | -0.536643000 | -1.964257000 |
| O | 1.840468000  | 1.298295000  | 1.381422000  |
| H | 2.695107000  | 1.365978000  | -0.075884000 |
| O | 2.977420000  | 1.399874000  | -1.027367000 |
| H | 1.041297000  | 2.202699000  | -1.455159000 |
| C | 4.272759000  | 0.831311000  | -1.169541000 |
| C | 5.319048000  | 1.941524000  | -1.044440000 |
| C | 4.493571000  | -0.243031000 | -0.101248000 |
| C | 4.326285000  | 0.210661000  | -2.563293000 |
| H | 5.123753000  | 2.717851000  | -1.789637000 |
| H | 5.267247000  | 2.401696000  | -0.052793000 |
| H | 6.333093000  | 1.556573000  | -1.193755000 |
| H | 3.778867000  | -1.062672000 | -0.230207000 |
| H | 5.505684000  | -0.654289000 | -0.169601000 |
| H | 4.352556000  | 0.179639000  | 0.899220000  |
| H | 5.324265000  | -0.181919000 | -2.781846000 |

|   |              |              |              |
|---|--------------|--------------|--------------|
| H | 3.607043000  | -0.611602000 | -2.637370000 |
| H | 4.072583000  | 0.962927000  | -3.315793000 |
| C | 2.003441000  | 2.498544000  | 2.118178000  |
| C | 0.986607000  | 2.538399000  | 3.261939000  |
| C | 3.421518000  | 2.491427000  | 2.686901000  |
| C | 1.812310000  | 3.707938000  | 1.193806000  |
| H | -0.033846000 | 2.536330000  | 2.865315000  |
| H | 1.113528000  | 1.658208000  | 3.902925000  |
| H | 1.112741000  | 3.434795000  | 3.878521000  |
| H | 4.152774000  | 2.468347000  | 1.872557000  |
| H | 3.613428000  | 3.379108000  | 3.298511000  |
| H | 3.570527000  | 1.600540000  | 3.306070000  |
| H | 1.992889000  | 4.648314000  | 1.724988000  |
| H | 2.508704000  | 3.640673000  | 0.350647000  |
| H | 0.791600000  | 3.727804000  | 0.795030000  |
| C | -0.260068000 | -2.287493000 | 1.751648000  |
| C | 0.617008000  | -1.375347000 | 2.321973000  |
| C | -0.033243000 | -3.660074000 | 1.796281000  |
| C | 1.782388000  | -1.852552000 | 2.915853000  |
| H | 0.456542000  | -0.303683000 | 2.244493000  |
| C | 1.119894000  | -4.123182000 | 2.418276000  |
| H | -0.743345000 | -4.334144000 | 1.329462000  |
| C | 2.030463000  | -3.220453000 | 2.970275000  |
| H | 2.492594000  | -1.136294000 | 3.314900000  |
| H | 1.315379000  | -5.189606000 | 2.460548000  |
| H | 2.938885000  | -3.588827000 | 3.435563000  |
| C | -5.084405000 | -0.153863000 | -0.142790000 |
| H | -5.972641000 | -0.118079000 | -0.773928000 |
| H | -5.106076000 | 0.695146000  | 0.544739000  |
| C | -4.984212000 | -1.472918000 | 0.666231000  |
| H | -5.468149000 | -1.419033000 | 1.641539000  |
| H | -5.402056000 | -2.323935000 | 0.118881000  |

**B-5b**

|   |              |             |              |
|---|--------------|-------------|--------------|
| C | 0.930850000  | 4.255176000 | 1.103039000  |
| C | 2.063374000  | 4.576138000 | 0.349843000  |
| C | 2.565239000  | 3.693927000 | -0.598448000 |
| C | 1.904090000  | 2.478261000 | -0.795780000 |
| C | 0.713721000  | 2.187212000 | -0.109052000 |
| C | 0.252055000  | 3.059008000 | 0.874784000  |
| C | 0.163486000  | 0.830532000 | -0.586867000 |
| N | 2.323858000  | 1.410003000 | -1.559517000 |
| C | -1.179568000 | 0.928600000 | -1.346232000 |
| C | -2.356698000 | 1.589726000 | -0.676399000 |
| C | 1.306525000  | 0.362875000 | -1.504881000 |

|   |              |              |              |
|---|--------------|--------------|--------------|
| O | -2.426601000 | 1.968612000  | 0.470855000  |
| C | 1.751868000  | -0.976421000 | -1.570756000 |
| C | 3.129822000  | -1.336136000 | -1.687947000 |
| C | 3.539464000  | -2.661562000 | -1.662582000 |
| C | 2.628583000  | -3.712952000 | -1.532624000 |
| C | 1.270006000  | -3.389908000 | -1.475545000 |
| C | 0.842483000  | -2.074080000 | -1.510380000 |
| O | -3.378733000 | 1.712312000  | -1.536761000 |
| C | -4.556225000 | 2.307620000  | -0.994550000 |
| H | 0.568672000  | 4.943412000  | 1.859101000  |
| H | 2.574469000  | 5.518621000  | 0.522769000  |
| H | 3.471992000  | 3.919648000  | -1.151011000 |
| H | -0.638919000 | 2.820015000  | 1.440985000  |
| H | -0.962728000 | 1.487203000  | -2.260538000 |
| H | -1.504036000 | -0.061782000 | -1.686698000 |
| H | 3.869431000  | -0.546319000 | -1.779011000 |
| H | 4.602170000  | -2.880661000 | -1.743776000 |
| H | 2.960795000  | -4.744699000 | -1.518423000 |
| H | 0.529517000  | -4.187649000 | -1.433152000 |
| H | -0.220828000 | -1.859639000 | -1.553163000 |
| H | -4.937974000 | 1.703239000  | -0.167883000 |
| H | -4.342316000 | 3.313461000  | -0.627286000 |
| H | -5.276600000 | 2.339892000  | -1.809848000 |
| N | 1.242834000  | -0.322990000 | 1.345325000  |
| N | -0.176909000 | -1.834135000 | 2.070764000  |
| N | -0.727926000 | -1.041749000 | 1.086470000  |
| C | 0.135415000  | -0.117263000 | 0.613377000  |
| C | 1.027207000  | -1.366401000 | 2.188100000  |
| C | 2.623434000  | 0.176910000  | 1.374978000  |
| H | 2.984465000  | 0.356176000  | 0.360900000  |
| H | 2.642946000  | 1.109453000  | 1.947287000  |
| H | 2.656388000  | 1.645793000  | -2.489124000 |
| C | -2.072711000 | -1.385857000 | 0.702087000  |
| C | -2.265989000 | -2.526620000 | -0.072032000 |
| C | -3.144377000 | -0.674498000 | 1.227678000  |
| C | -3.562597000 | -2.909575000 | -0.396641000 |
| H | -1.405167000 | -3.103381000 | -0.390284000 |
| C | -4.437950000 | -1.067994000 | 0.895351000  |
| H | -2.959751000 | 0.176966000  | 1.869721000  |
| C | -4.646802000 | -2.173113000 | 0.074795000  |
| H | -3.724212000 | -3.790158000 | -1.008807000 |
| H | -5.283269000 | -0.518343000 | 1.296604000  |
| H | -5.657518000 | -2.474402000 | -0.180284000 |
| C | 3.337078000  | -1.002417000 | 2.071377000  |
| H | 4.207791000  | -0.675576000 | 2.640547000  |

|   |             |              |             |
|---|-------------|--------------|-------------|
| H | 3.661009000 | -1.700551000 | 1.293403000 |
| C | 2.266015000 | -1.688897000 | 2.957772000 |
| H | 2.414356000 | -2.763589000 | 3.061455000 |
| H | 2.212223000 | -1.246165000 | 3.957687000 |

**B-TSb5**

|   |              |              |              |
|---|--------------|--------------|--------------|
| C | 1.511397000  | 4.282464000  | 0.891036000  |
| C | 2.760898000  | 4.335501000  | 0.265933000  |
| C | 3.191761000  | 3.298514000  | -0.549873000 |
| C | 2.339630000  | 2.209799000  | -0.745640000 |
| C | 1.051177000  | 2.176791000  | -0.184822000 |
| C | 0.655111000  | 3.206245000  | 0.671426000  |
| C | 0.345530000  | 0.905883000  | -0.636495000 |
| N | 2.627767000  | 1.030582000  | -1.401775000 |
| C | -0.997174000 | 1.098006000  | -1.358749000 |
| C | -2.098085000 | 1.854227000  | -0.661535000 |
| C | 1.406485000  | 0.232361000  | -1.437410000 |
| O | -2.115410000 | 2.233792000  | 0.487255000  |
| C | 1.563395000  | -1.172724000 | -1.577461000 |
| C | 2.849743000  | -1.781392000 | -1.661727000 |
| C | 3.002538000  | -3.158775000 | -1.730745000 |
| C | 1.901711000  | -4.016861000 | -1.723883000 |
| C | 0.630247000  | -3.444090000 | -1.666367000 |
| C | 0.460747000  | -2.070363000 | -1.599991000 |
| O | -3.122626000 | 2.064251000  | -1.502609000 |
| C | -4.226877000 | 2.774275000  | -0.945816000 |
| H | 1.202306000  | 5.087528000  | 1.549233000  |
| H | 3.413532000  | 5.186444000  | 0.437267000  |
| H | 4.176819000  | 3.312282000  | -1.006374000 |
| H | -0.311700000 | 3.172264000  | 1.155153000  |
| H | -0.771520000 | 1.631466000  | -2.286780000 |
| H | -1.419175000 | 0.137865000  | -1.674851000 |
| H | 3.730434000  | -1.146734000 | -1.651141000 |
| H | 4.006685000  | -3.572621000 | -1.788725000 |
| H | 2.028972000  | -5.091786000 | -1.784641000 |
| H | -0.249283000 | -4.084959000 | -1.696462000 |
| H | -0.545472000 | -1.666484000 | -1.612868000 |
| H | -4.652096000 | 2.217360000  | -0.107515000 |
| H | -3.909480000 | 3.757306000  | -0.591818000 |
| H | -4.955147000 | 2.870974000  | -1.748949000 |
| N | 1.157989000  | -0.475566000 | 1.455691000  |
| N | -0.397866000 | -1.912775000 | 2.046668000  |
| N | -0.861837000 | -0.981196000 | 1.138186000  |
| C | 0.077655000  | -0.090346000 | 0.751778000  |
| C | 0.841189000  | -1.567049000 | 2.204653000  |

|   |              |              |              |
|---|--------------|--------------|--------------|
| C | 2.581718000  | -0.121540000 | 1.525377000  |
| H | 2.973489000  | 0.080653000  | 0.527825000  |
| H | 2.695099000  | 0.765251000  | 2.156104000  |
| H | 3.096467000  | 1.133053000  | -2.296361000 |
| C | -2.235581000 | -1.138676000 | 0.744984000  |
| C | -2.572280000 | -2.245192000 | -0.031079000 |
| C | -3.209754000 | -0.285649000 | 1.250417000  |
| C | -3.904423000 | -2.456547000 | -0.367312000 |
| H | -1.789500000 | -2.926733000 | -0.345054000 |
| C | -4.540520000 | -0.506713000 | 0.904348000  |
| H | -2.922033000 | 0.541306000  | 1.886893000  |
| C | -4.887035000 | -1.581295000 | 0.089751000  |
| H | -4.174187000 | -3.310626000 | -0.978895000 |
| H | -5.309352000 | 0.153485000  | 1.292726000  |
| H | -5.926417000 | -1.749132000 | -0.172867000 |
| C | 3.175726000  | -1.406239000 | 2.145592000  |
| H | 4.057423000  | -1.196431000 | 2.752071000  |
| H | 3.459588000  | -2.073563000 | 1.326551000  |
| C | 2.031107000  | -2.062276000 | 2.957885000  |
| H | 2.082246000  | -3.150739000 | 2.975042000  |
| H | 1.998000000  | -1.699138000 | 3.990221000  |
